# COVID-19 pandemic dynamics in South Africa and epidemiological characteristics of three variants of concern (Beta, Delta, and Omicron)

Wan Yang<sup>1\*</sup> and Jeffrey Shaman<sup>2</sup>

<sup>1</sup>Department of Epidemiology, <sup>2</sup>Department of Environmental Health Sciences, Mailman School of Public Health, Columbia University, New York, NY, USA

\*Correspondence to: wy2202@cumc.columbia.edu

## Abstract

Severe acute respiratory syndrome coronavirus 2 (SARS-CoV-2) variants of concern (VOCs) have been key drivers of new coronavirus disease 2019 (COVID-19) pandemic waves. To better understand variant epidemiologic characteristics, here we apply a model-inference system to reconstruct SARS-CoV-2 transmission dynamics in South Africa, a country that has experienced three VOC pandemic waves (i.e. Beta, Delta, and Omicron). We estimate key epidemiologic quantities in each of the nine South African provinces during March 2020 – Feb 2022, while accounting for changing detection rates, infection seasonality, nonpharmaceutical interventions, and vaccination. Model validation shows that estimated underlying infection rates and key parameters (e.g., infection-detection rate and infection-fatality risk) are in line with independent epidemiological data and investigations. In addition, retrospective predictions capture pandemic trajectories beyond the model training period. These detailed, validated model-inference estimates thus enable quantification of both the immune erosion potential and transmissibility of three major SARS-CoV-2 VOCs, i.e., Beta, Delta, and Omicron. These findings help elucidate changing COVID-19 dynamics and inform future public health planning.

**Keywords:** COVID-19, SARS-CoV-2, variant of concern, immune evasion, transmissibility

## INTRODUCTION

Since its emergence in late December 2019, the severe acute respiratory syndrome coronavirus 2 (SARS-CoV-2) has spread globally, causing the coronavirus disease 2019 (COVID-19) pandemic (1). In just two years, SARS-CoV-2 has caused several pandemic waves in quick succession in many places. Many of these repeated pandemic waves have been driven by new variants of concern (VOCs) or interest (VOIs) that erode prior immunity from either infection or vaccination, increase transmissibility, or a combination of both. However, while laboratory and field studies have provided insights into these epidemiological characteristics, quantifying the extent of immune erosion (or evasion) and changes to transmissibility for each VOC remains challenging.

37  
38 Like many places, by February 2022 South Africa had experienced four distinct pandemic waves  
39 caused by the ancestral SARS-CoV-2 and three VOCs (Beta, Delta, and Omicron BA.1). However,  
40 South Africa is also unique in that the country had the earliest surge for two of the five VOCs  
41 identified to date – namely, Beta (2) and Omicron (3). To better understand the COVID-19  
42 dynamics in South Africa and variant epidemiological characteristics, here we utilize a model-  
43 inference system similar to one developed for study of SARS-CoV-2 VOCs, including the Beta  
44 variant in South Africa (4). We use this system to reconstruct SARS-CoV-2 transmission  
45 dynamics in each of the nine provinces of South Africa from the pandemic onset during March  
46 2020 to the end of February 2022 while accounting for multiple factors modulating underlying  
47 transmission dynamics. We then rigorously validate the model-inference estimates using  
48 independent data and retrospective predictions. The validated estimates quantify the immune  
49 erosion potential and transmissibility of three major SARS-CoV-2 variants, i.e., Beta, Delta, and  
50 Omicron (BA.1), in South Africa. Our findings highlight several common characteristics of SARS-  
51 CoV-2 VOCs and the need for more proactive planning and preparedness for future VOCs,  
52 including development of a universal vaccine that can effectively block SARS-CoV-2 infection as  
53 well as prevent severe disease.

## 54 55 **RESULTS**

### 56 **Model fit and validation**

57 The model-inference system uses case and death data to reconstruct the transmission  
58 dynamics of SARS-CoV-2, while accounting for under-detection of infection, infection  
59 seasonality, implemented nonpharmaceutical interventions (NPIs), and vaccination (see  
60 Methods). Overall, the model-inference system is able to fit weekly case and death data in each  
61 of the nine South African provinces (Fig 1A, Fig S1, and additional discussion in Supplemental  
62 Materials). Additional testing (in particular, for the infection-detection rate) and visual  
63 inspections indicate that posterior estimates for the model parameters are consistent with  
64 those reported in the literature, or changed over time and/or across provinces in directions as  
65 would be expected (see Supplemental Materials).

66  
67 We then validated the model-inference estimates using three independent datasets. First, we  
68 used serology data. We note that early in the pandemic serology data may reflect underlying  
69 infection rates but later, due to waning antibody titers and reinfection, likely underestimate  
70 infection. Compared to seroprevalence measures taken at multiple time points in each  
71 province, our model estimated cumulative infection rates roughly match corresponding  
72 serology measures and trends over time; as expected, model estimates were higher than  
73 serology measures taken during later months (Fig 1B). Second, compared to hospital admission  
74 data, across the nine provinces, model estimated infection numbers were well correlated with

75 numbers of hospitalizations for all four pandemic waves caused by the ancestral, Beta, Delta,  
76 and Omicron (BA.1) variants, respectively ( $r > 0.75$ , Fig S2 A-D). Third, model-estimated  
77 infection numbers were correlated with age-adjusted excess mortality for both the ancestral  
78 and Delta wave ( $r = 0.86$  and  $0.61$ , respectively; Fig S2 A and C). For the Beta wave, after  
79 excluding Western Cape, a province with a very high hospitalization rate but low excess  
80 mortality during this wave (Fig S2 B), model-estimated infection numbers were also correlated  
81 with age-adjusted excess mortality for the remaining provinces ( $r = 0.55$ ; Fig S2 B). For the  
82 Omicron (BA.1) wave, like many other places, due to prior infection and/or vaccination (5, 6),  
83 mortality rates decoupled from infection rates (Fig S2 D). Overall, comparisons with the three  
84 independent datasets indicate our model-inference estimates align with underlying  
85 transmission dynamics.

86  
87 In addition, as a fourth model validation, we generated retrospective predictions of the Delta  
88 and Omicron (BA.1) waves at two key time points, i.e. 2 weeks and 1 week, separately, before  
89 the observed peak of cases (approximately 3 to 5 weeks before the observed peak of deaths;  
90 Fig 2). To accurately predict a pandemic wave caused by a new variant, the model-inference  
91 system needs to accurately estimate the background population characteristics (e.g.,  
92 population susceptibility) before the emergence of the new variant, as well as changes in  
93 population susceptibility and transmissibility due to the new variant. This is particularly  
94 challenging for South Africa, as the pandemic waves there tended to progress quickly, with  
95 cases surging and peaking within 3 to 7 weeks before declining. As a result, often only 1 to 6  
96 weeks of new variant data were available for model-inference before generating the prediction.  
97 Despite these challenges, 1-2 weeks before the case peak and 3-5 weeks before the observed  
98 death peak, the model was able to accurately predict the remaining trajectories of cases and  
99 deaths in most of the nine provinces for both the Delta and Omicron (BA.1) waves (Fig 2 for the  
100 four most populous provinces and Fig S3 for the remainder). These accurate model predictions  
101 further validate the model-inference estimates.

102

### 103 **Pandemic dynamics and key model-inference, using Gauteng province as an example**

104 Next, we use Gauteng, the province with the largest population, as an example to highlight  
105 pandemic dynamics in South Africa thus far and develop key model-inference estimates (Fig 3  
106 for Gauteng and Figs S4-S11 for each of the other eight provinces). Despite lower cases per  
107 capita than many other countries, infection numbers in South Africa were likely much higher  
108 due to under-detection. For Gauteng, the estimated infection-detection rate during the first  
109 pandemic wave was 4.59% (95% CI: 2.62 – 9.77%), and increased slightly to 6.18% (95% CI: 3.29  
110 – 11.11%) and 6.27% (95% CI: 3.44 – 12.39%) during the Beta and Delta waves, respectively  
111 (Table S1). These estimates are in line with serology data. In particular, a population-level sero-  
112 survey in Gauteng found 68.4% seropositivity among those unvaccinated at the end of the Delta

113 wave (7). Combining the reported cases at that time (~6% of the population size) with  
114 undercounting of infections in sero-surveys due to sero-reversions and reinfections suggests  
115 that the overall detection rate would be less than 10%.

116  
117 Using our inferred under-detection (Fig 3E), we estimate that 32.83% (95% CI: 15.42 - 57.59%,  
118 Table S2) of the population in Gauteng were infected during the first wave, predominantly  
119 during winter when more conducive climate conditions and relaxed public health restrictions  
120 existed (see the estimated seasonal and mobility trends, Fig 3A). This high infection rate, while  
121 with uncertainty, is in line with serology measures taken in Gauteng at the end of the first wave  
122 (ranging from 15% to 27% among 6 sero-surveys during November 2020; Fig 1B) and a study  
123 showing 30% sero-positivity among participants enrolled in the Novavax NVX-CoV2373 vaccine  
124 phase 2a-b trial in South Africa during August – November 2020 (8).

125  
126 With the emergence of Beta, another 21.87% (95% CI: 12.16 – 41.13%) of the population in  
127 Gauteng – including reinfections – is estimated to have been infected, even though the Beta  
128 wave occurred during summer under less conducive climate conditions for transmission (Fig  
129 3A). The model-inference system estimates a large increase in population susceptibility with the  
130 surge of Beta (Fig 3D; note population susceptibility is computed as  $S / N \times 100\%$ , where  $S$  is the  
131 estimated number of susceptible people and  $N$  is population size). This dramatic increase in  
132 population susceptibility (vs. a likely more gradual change due to waning immunity), to the then  
133 predominant Beta variant, suggests Beta likely substantially eroded prior immunity and is  
134 consistent with laboratory studies showing low neutralizing ability of convalescent sera against  
135 Beta (9, 10). In addition, an increase in transmissibility is also evident for Beta, after accounting  
136 for concurrent NPIs and infection seasonality (Fig 3C; note transmissibility is computed as the  
137 product of the estimated variant-specific transmission rate and the infectious period; see  
138 Methods for detail). Notably, in contrast to the large fluctuation of the time-varying effective  
139 reproduction number over time ( $R_t$ , Fig 3B), the transmissibility estimates are more stable and  
140 reflect changes in variant-specific properties. Further, consistent with in-depth epidemiological  
141 findings (11), the estimated overall infection-fatality risk for Beta was about twice as high as the  
142 ancestral SARS-CoV-2 (0.19% [95% CI: 0.10 - 0.33%] vs. 0.09% [95% CI: 0.05 - 0.20%], Fig 3F and  
143 Table S3). Nonetheless, these estimates are based on documented COVID-19 deaths and are  
144 likely underestimates.

145  
146 With the introduction of Delta, a third pandemic wave occurred in Gauteng during the 2021  
147 winter. The model-inference system estimates a 49.82% (95% CI: 25.22 – 90.79%) attack rate by  
148 Delta, despite the large number of infections during the previous two waves. This large attack  
149 rate was possible due to the high transmissibility of Delta, as reported in multiple studies (12-

150 16), the more conducive winter transmission conditions (Fig 3A), and the immune erosive  
151 properties of Delta relative to both the ancestral and Beta variants (17-19).

152  
153 Due to these large pandemic waves, prior to the detection of Omicron (BA.1) in Gauteng,  
154 estimated cumulative infection numbers surpassed the population size (Fig 4B), indicating the  
155 large majority of the population had been infected and some more than once. With the rise of  
156 Omicron (BA.1), the model-inference system estimates a very large increase in population  
157 susceptibility (Fig 3D), as well as an increase in transmissibility (Fig 3C); however, unlike  
158 previous waves, the Omicron (BA.1) wave progresses much more quickly, peaking 2-3 weeks  
159 after initiating marked exponential growth. These estimates suggest that several additional  
160 factors may have also contributed to the observed dynamics, including changes to the  
161 infection-detection rate (Fig 3E and Supplemental Materials), a summer seasonality increasingly  
162 suppressing transmission as the wave progressed (Fig 3A), as well as a slight change in  
163 population mobility suggesting potential behavior changes (Fig 3A). By the end of February  
164 2022, the model-inference system estimates a 44.49% (95% CI: 19.01 – 75.30%) attack rate,  
165 with only 4.26% (95% CI: 2.46 – 9.72%) of infections detected as cases, during the Omicron  
166 (BA.1) wave in Gauteng. In addition, consistent with the reported 0.3 odds of severe disease  
167 compared to Delta infections (6), estimated overall infection-fatality risk during the Omicron  
168 (BA.1) wave was about 30% of that during the Delta wave in Gauteng (0.03% [95% CI: 0.02 –  
169 0.06%] vs. 0.11% [95% CI: 0.06 – 0.21%], based on documented COVID-19 deaths; Table S3).

170  
171 **Model inferred epidemiological characteristics across the nine provinces in South Africa**

172 Across all nine provinces in South Africa, the pandemic timing and intensity varied (Fig 4 A-C).  
173 In addition to Gauteng, high cumulative infection rates during the first three pandemic waves  
174 are also estimated for Western Cape and Northern Cape (Fig 1 C-E, Fig 4B and Table S2).  
175 Overall, all nine provinces likely experienced three large pandemic waves prior to the growth of  
176 Omicron (BA.1); estimated average cumulative infections ranged from 60% of the population in  
177 Limpopo to 122% in Northern Cape (Fig 4B). Corroboration for these cumulative infection  
178 estimates is derived from mortality data. Excess mortality before the Omicron (BA.1) wave was  
179 as high as 0.47% of the South African population by the end of November 2021 (20), despite the  
180 relatively young population (median age: 27.6 years (21) vs. 38.5 years in the US (22)) and thus  
181 lower expected infection-fatality risk (23, 24). Assuming an infection-fatality risk of 0.5% (similar  
182 to estimates in (25) for South Africa), these excess deaths would convert to a 94% infection  
183 rate.

184  
185 We then use these model-inference estimates to quantify the immune erosion potential and  
186 increase in transmissibility for each VOC. Specifically, the immune erosion (against infection)  
187 potential is computed as the ratio of two quantities – the numerator is the increase of

188 population susceptibility due to a given VOC and the denominator is population immunity (i.e.,  
189 complement of population susceptibility) at wave onset. The relative increase in transmissibility  
190 is also computed as a ratio, i.e., the average increase due to a given VOC relative to the  
191 ancestral SARS-CoV-2 (see Methods). As population-specific factors contributing to  
192 transmissibility (e.g., population density and average contact rate) would be largely cancelled  
193 out in the latter ratio, we expect estimates of the VOC transmissibility increase to be generally  
194 applicable to different populations. However, prior exposures and vaccinations varied over time  
195 and across populations; thus, the level of immune erosion is necessarily estimated relative to  
196 the local population immune landscape at the time of the variant surge and should be  
197 interpreted accordingly. In addition, this assessment does not distinguish the sources of  
198 immunity or partial protection against severe disease; rather, it assesses the overall loss of  
199 immune protection against infection for a given VOC.

200  
201 In the above context, we estimate that Beta eroded immunity among 63.4% (95% CI: 45.0 –  
202 77.9%) of individuals with prior ancestral SARS-CoV-2 infection and was 34.3% (95% CI: 20.5 –  
203 48.2%) more transmissible than the ancestral SARS-CoV-2. These estimates for Beta are  
204 consistent across the nine provinces (Fig 4D, 1<sup>st</sup> column and Table 1), as well as with our  
205 previous estimates using national data for South Africa (4). Additional support for the high  
206 immune erosion of Beta is evident from recoverees of ancestral SARS-CoV-2 infection who were  
207 enrolled in the Novavax NVX-CoV2373 vaccine phase 2a-b trial (8) and found to have a similar  
208 likelihood of COVID-19, mostly due to Beta, compared to those seronegative at enrollment.

209  
210 Estimates for Delta vary across the nine provinces (Fig 4D, 2<sup>nd</sup> column), given the more diverse  
211 population immune landscape among provinces after two pandemic waves. Overall, we  
212 estimate that Delta eroded 24.5% (95% CI: 0 – 53.2%) of prior immunity (gained from infection  
213 by ancestral SARS-CoV-2 and/or Beta, and/or vaccination) and was 47.5% (95% CI: 28.4 –  
214 69.4%) more transmissible than the ancestral SARS-CoV-2. Consistent with this finding, and in  
215 particular the estimated immune erosion, studies have reported a 27.5% reinfection rate during  
216 the Delta pandemic wave in Delhi, India (17) and reduced ability of sera from Beta-infection  
217 recoverees to neutralize Delta (18, 19).

218  
219 For Omicron (BA.1), estimates also vary by province but still consistently point to its higher  
220 transmissibility than all previous variants (Fig 4D, 3<sup>rd</sup> column). Overall, we estimate that  
221 Omicron (BA.1) is 94.0% (95% CI: 73.5 – 121.5%) more transmissible than the ancestral SARS-  
222 CoV-2. This estimated transmissibility is higher than Delta and consistent with *in vitro* and/or *ex*  
223 *vivo* studies showing Omicron (BA.1) replicates faster within host than Delta (26, 27). In  
224 addition, we estimate that Omicron (BA.1) eroded 54.1% (95% CI: 35.8 – 70.1%) of immunity  
225 due to all prior infections and vaccination. Importantly, as noted above, the estimate for

226 immune erosion is not directly comparable across variants, as it is relative to the combined  
227 population immunity accumulated until the rise of each variant. In the case of Beta, it is  
228 immunity accumulated from the first wave via infection by the ancestral SARS-CoV-2. In the  
229 case of Omicron (BA.1), it includes immunity from prior infection and refection of any of the  
230 previously circulating variants as well as vaccination. Thus, the estimate for Omicron (BA.1) may  
231 represent a far broader capacity for immune erosion than was evident for Beta. Supporting the  
232 suggestion of broad-spectrum immune erosion of Omicron (BA.1), studies have reported low  
233 neutralization ability of convalescent sera from infections by all previous variants (28, 29), as  
234 well as high attack rates among vaccinees in several Omicron (BA.1) outbreaks (30, 31).

235

## 236 **DISCUSSION**

237 Using a comprehensive model-inference system, we have reconstructed the pandemic  
238 dynamics in each of the nine provinces of South Africa. Uncertainties exist in our findings, due  
239 to incomplete and varying detection of SARS-CoV-2 infections and deaths, changing population  
240 behavior and public health interventions, and changing circulating variants. To address these  
241 uncertainties, we have validated our estimates using three datasets not used by our model-  
242 inference system (i.e., serology, hospitalization, and excess mortality data; Fig 1B and Fig S2) as  
243 well as retrospective prediction (Fig 2 and Fig S4). In addition, as detailed in the Results, we  
244 have showed that estimated underlying infection rates (Fig 1B and Fig S2) and key parameters  
245 (e.g., infection-detection rate and infection-fatality risk) are in line with other independent  
246 epidemiological data and investigations. The detailed, validated model-inference estimates thus  
247 allow quantification of both the immune erosion potential and transmissibility of three major  
248 SARS-CoV-2 VOCs, i.e., Beta, Delta, and Omicron (BA.1).

249

250 The relevance of our model-inference estimates to previous studies has been presented in the  
251 Results section. Here, we make three additional general observations, drawn from global SARS-  
252 CoV-2 dynamics including but not limited to findings in South Africa. First, high prior immunity  
253 does not preclude new outbreaks, as neither infection nor current vaccination is sterilizing. As  
254 shown in South Africa, even with the high infection rate accumulated from preceding waves,  
255 new waves can occur with the emergence or introduction of new variants. Around half of South  
256 Africans are estimated to have been infected after the Beta wave (Table S2 and Table S4), yet  
257 the Delta variant caused a third large pandemic wave, followed by a fourth wave with  
258 comparable infection rates by Omicron BA.1 (Fig 4B and Table S2).

259

260 Second, large numbers of hospitalizations and/or deaths can still occur in later waves with large  
261 infection surges, even though prior infection may provide partial protection and to some extent  
262 temper disease severity. This is evident from the large Delta wave in South Africa, which  
263 resulted in 0.2% excess mortality (vs. 0.08% during the first wave and 0.19% during the Beta

264 wave (20)). More recently, due to the Omicron BA.4/BA.5 subvariants that have been shown to  
265 evade prior immunity including from BA.1 infection (32, 33), a fifth wave began in South Africa  
266 during May 2022, leading to increases in both cases and hospitalizations (34). Together, the  
267 continued transmission and potential severe outcomes highlight the importance of continued  
268 preparedness and prompt public health actions as societies learn to live with SARS-CoV-2.

269  
270 Third, multiple SARS-CoV-2 VOCs/VOIs have emerged in the two years since pandemic  
271 inception. It is challenging to predict the frequency and direction of future viral mutation, in  
272 particular, the level of immune erosion, changes in transmissibility, and innate severity.  
273 Nonetheless, given high exposure and vaccination in many populations, variants capable of  
274 eroding a wide spectrum of prior immunity (i.e., from infection by multiple preexisting variants  
275 and vaccination) would have a greater chance of causing new major outbreaks. Indeed, except  
276 for the Alpha variant, the other four important VOCs (i.e. Beta, Gamma, Delta, and Omicron) all  
277 produced some level of immune erosion. In addition, later VOCs, like Delta and Omicron,  
278 appear to have been more genetically distinct from previous variants (35). As a result, they are  
279 likely more capable of causing re-infection despite diverse prior exposures and in turn new  
280 pandemic waves. Given this pattern, to prepare for future antigenic changes from new variants,  
281 development of a universal vaccine that can effectively block SARS-CoV-2 infection in addition  
282 to preventing severe disease (e.g. shown in (36)) is urgently needed (37).

283  
284 The COVID-19 pandemic has caused devastating public health and economic burdens  
285 worldwide. Yet SARS-CoV-2 will likely persist in the future. To mitigate its impact, proactive  
286 planning and preparedness is paramount.

## 287 288 **METHODS**

### 289 **Data sources and processing**

290 We used reported COVID-19 case and mortality data to capture transmission dynamics,  
291 weather data to estimate infection seasonality, mobility data to represent concurrent NPIs, and  
292 vaccination data to account for changes in population susceptibility due to vaccination in the  
293 model-inference system. Provincial level COVID-19 case, mortality, and vaccination data were  
294 sourced from the Coronavirus COVID-19 (2019-nCoV) Data Repository for South Africa  
295 (COVID19ZA)(38). Hourly surface station temperature and relative humidity came from the  
296 Integrated Surface Dataset (ISD) maintained by the National Oceanic and Atmospheric  
297 Administration (NOAA) and are accessible using the “stationaRy” R package (39, 40). We  
298 computed specific humidity using temperature and relative humidity per the Clausius-  
299 Clapeyron equation (41). We then aggregated these data for all weather stations in each  
300 province with measurements since 2000 and calculated the average for each week of the year  
301 during 2000-2020.



302  
303 Mobility data were derived from Google Community Mobility Reports (42); we aggregated all  
304 business-related categories (i.e., retail and recreational, transit stations, and workplaces) in all  
305 locations in each province to weekly intervals. For vaccination, provincial vaccination data from  
306 the COVID19ZA data repository recorded the total number of vaccine doses administered over  
307 time; to obtain a breakdown for numbers of partial (1 dose of mRNA vaccine) and full  
308 vaccinations (1 dose of Janssen vaccine or 2 doses of mRNA vaccine), separately, we used  
309 national vaccination data for South Africa from Our World in Data (43, 44) to apportion the  
310 doses each day. In addition, cumulative case data suggested 18,586 new cases on Nov 23, 2021,  
311 whereas the South Africa Department of Health reported 868 (45). Thus, for Nov 23, 2021, we  
312 used linear interpolation to fill in estimates for each province on that day and then scaled the  
313 estimates such that they sum to 868.

### 314 315 **Model-inference system**

316 The model-inference system is based on our previous work estimating changes in  
317 transmissibility and immune erosion for SARS-CoV-2 VOCs including Alpha, Beta, Gamma, and  
318 Delta (4, 46). Below we describe each component.

#### 319 320 *Epidemic model*

321 The epidemic model follows an SEIRSV (susceptible-exposed-infectious-recovered-susceptible-  
322 vaccination) construct per Eqn 1:

$$323 \quad \begin{cases} \frac{dS}{dt} = \frac{R}{L_t} - \frac{b_t e_t m_t \beta_t IS}{N} - \varepsilon - v_{1,t} - v_{2,t} \\ \frac{dE}{dt} = \frac{b_t e_t m_t \beta_t IS}{N} - \frac{E}{Z_t} + \varepsilon \\ \frac{dI}{dt} = \frac{E}{Z_t} - \frac{I}{D_t} \\ \frac{dR}{dt} = \frac{I}{D_t} - \frac{R}{L_t} + v_{1,t} + v_{2,t} \end{cases}$$

324

325  
326 where  $S$ ,  $E$ ,  $I$ ,  $R$  are the number of susceptible, exposed (but not yet infectious), infectious, and  
327 recovered/immune/deceased individuals;  $N$  is the population size; and  $\varepsilon$  is the number of  
328 travel-imported infections. In addition, the model includes the following key components:

- 329  
330 1) Virus-specific properties, including the time-varying variant-specific transmission rate  $\beta_t$ ,  
331 latency period  $Z_t$ , infectious period  $D_t$ , and immunity period  $L_t$ . Of note, the immunity  
332 period  $L_t$  and the term  $R/L_t$  in Eqn 1 are used to model the waning of immune protection

333 against infection. Also note that all parameters are estimated for each week ( $t$ ) as  
334 described below.

335 2) The impact of NPIs. Specifically, we use relative population mobility (see data above) to  
336 adjust the transmission rate via the term  $m_t$ , as the overall impact of NPIs (e.g., reduction  
337 in the time-varying effective reproduction number  $R_t$ ) has been reported to be highly  
338 correlated with population mobility during the COVID-19 pandemic.(47-49) To further  
339 account for potential changes in effectiveness, the model additionally includes a  
340 parameter,  $e_t$ , to scale NPI effectiveness.

341 3) The impact of vaccination, via the terms  $v_{1,t}$  and  $v_{2,t}$ . Specifically,  $v_{1,t}$  is the number of  
342 individuals successfully immunized after the first dose of vaccine and is computed using  
343 vaccination data and vaccine effectiveness (VE) for 1<sup>st</sup> dose; and  $v_{2,t}$  is the additional  
344 number of individuals successfully immunized after the second vaccine dose (i.e., excluding  
345 those successfully immunized after the first dose). In South Africa, around two-thirds of  
346 vaccines administered during our study period were the mRNA BioNTech/Pfizer vaccine  
347 and one-third the Janssen vaccine (50). We thus set VE to 20%/85% (partial/full  
348 vaccination) for Beta, 35%/75% for Delta, and 10%/35% for Omicron (BA.1) based on  
349 reported VE estimates (51-53).

350 4) Infection seasonality, computed using temperature and specific humidity data as described  
351 previously (see supplemental material of Yang and Shaman(4)). Briefly, we estimated the  
352 relative seasonal trend ( $b_t$ ) using a model representing the dependency of the survival of  
353 respiratory viruses including SARS-CoV-2 to temperature and humidity (54, 55), per

$$354 \quad R_0(t) = [aq^2(t) + bq(t) + c] \left[ \frac{T_c}{T(t)} \right]^{T_{exp}} \quad (\text{Eqn 2})$$

$$355 \quad b_t = \frac{R_0(t)}{\overline{R_0(t)}} \quad (\text{Eqn 3})$$

356 In essence, the seasonality function in Eqn 2 assumes that humidity has a bimodal effect on  
357 seasonal risk of infection, with both low and high humidity conditions favoring transmission  
358 [i.e., the parabola in 1st set of brackets, where  $q(t)$  is weekly specific humidity measured by  
359 local weather stations]; and this effect is further modulated by temperature, with low  
360 temperatures promoting transmission and temperatures above a certain threshold limiting  
361 transmission [i.e., 2nd set of brackets, where  $T(t)$  is weekly temperature measured by local  
362 weather stations and  $T_c$  is the threshold]. As SARS-CoV-2 specific parameters ( $a$ ,  $b$ ,  $c$ ,  $T_c$ ,  
363 and  $T_{exp}$  in Eqn 2) are not available, to estimate its seasonality using Eqn 2, as done in Yang  
364 and Shaman (4), we use parameters estimated for influenza (56) and scale the weekly  
365 outputs [i.e.,  $R_0(t)$ ] by the annual mean (i.e.,  $\overline{R_0}$ ) per Eqn 3. In doing so, the scaled outputs  
366 ( $b_t$ ) are no longer specific to influenza; rather, they represent the *relative*, seasonality-  
367 related transmissibility by week, general to viruses sharing similar seasonal responses. As  
368 shown in Fig 2A,  $b_t$  estimates over the year averaged to 1 such that weeks with  $b_t > 1$  (e.g.  
369 during the winter) are more conducive to SARS-CoV-2 transmission whereas weeks with  $b_t$

370 <1 (e.g. during the summer) have less favorable climate conditions for transmission. The  
371 estimated relative seasonal trend,  $b_t$ , is used to adjust the relative transmission rate at time  
372  $t$  in Eqn 1.

373

#### 374 *Observation model to account for under-detection and delay*

375 Using the model-simulated number of infections occurring each day, we further computed the  
376 number of cases and deaths each week to match with the observations, as done in Yang et al  
377 (57). Briefly, we include 1) a time-lag from infectiousness to detection (i.e., an infection being  
378 diagnosed as a case), drawn from a gamma distribution with a mean of  $T_{d,mean}$  days and a  
379 standard deviation of  $T_{d,sd}$  days, to account for delays in detection (Table S5); 2) an infection-  
380 detection rate ( $r_t$ ), i.e. the fraction of infections (including subclinical or asymptomatic  
381 infections) reported as cases, to account for under-detection; 3) a time-lag from infectiousness  
382 to death, drawn from a gamma distribution with a mean of 13-15 days and a standard deviation  
383 of 10 days; and 4) an infection-fatality risk ( $IFR_t$ ). To compute the model-simulated number of  
384 new cases each week, we multiplied the model-simulated number of new infections per day by  
385 the infection-detection rate, and further distributed these simulated cases in time per the  
386 distribution of time-from-infectiousness-to-detection. Similarly, to compute the model-  
387 simulated deaths per week and account for delays in time to death, we multiplied the  
388 simulated-infections by the IFR and then distributed these simulated deaths in time per the  
389 distribution of time-from-infectious-to-death. We then aggregated these daily numbers to  
390 weekly totals to match with the weekly case and mortality data for model-inference. For each  
391 week, the infection-detection rate ( $r_t$ ), the infection-fatality risk ( $IFR_t$ ), and the two time-to-  
392 detection parameters ( $T_{d,mean}$  and  $T_{d,sd}$ ) were estimated along with other parameters (see  
393 below).

394

#### 395 *Model inference and parameter estimation*

396 The inference system uses the ensemble adjustment Kalman filter (EAKF (58)), a Bayesian  
397 statistical method, to estimate model state variables (i.e.,  $S, E, I, R$  from Eqn 1) and parameters  
398 (i.e.,  $\beta_t, Z_t, D_t, L_t, e_t$ , from Eqn 1 as well as  $r_t, IFR_t$  and other parameters from the observation  
399 model). Briefly, the EAKF uses an ensemble of model realizations ( $n=500$  here), each with initial  
400 parameters and variables randomly drawn from a *prior* range (see Table S5). After model  
401 initialization, the system integrates the model ensemble forward in time for a week (per Eqn 1)  
402 to compute the prior distribution for each model state variable and parameter, as well as the  
403 model-simulated number of cases and deaths for that week. The system then combines the  
404 prior estimates with the observed case and death data for the same week to compute the  
405 posterior per Bayes' theorem (58). During this filtering process, the system updates the  
406 posterior distribution of all model variables and parameters for each week. For a further  
407 discussion on the filtering process and additional considerations, see the Supplemental text;

408 diagnosis of model posterior estimates for all parameters are also included in the Supplemental  
409 text and Figs. S15 – S23.

410

#### 411 *Estimating changes in transmissibility and immune erosion for each variant*

412 As in ref (4), we computed the variant-specific transmissibility ( $R_{TX}$ ) as the product of the  
413 variant-specific transmission rate ( $\beta_t$ ) and infectious period ( $D_t$ ). Note that  $R_t$ , the time-varying  
414 effective reproduction number, is defined as  $R_t = b_t e_t m_t \beta_t D_t S / N = b_t e_t m_t R_{TX} S / N$ . To  
415 reduce uncertainty, we averaged transmissibility estimates over the period a particular variant  
416 of interest was predominant. To find these predominant periods, we first specified the  
417 approximate timing of each pandemic wave in each province based on: 1) when available,  
418 genomic surveillance data; specifically, the onsets of the Beta wave in Eastern Cape, Western  
419 Cape, KwaZulu-Natal, and Northern Cape, were separately based on the initial detection of Beta  
420 in these provinces as reported in Tegally et al. (2); the onsets of the Delta wave in each of the  
421 nine provinces, separately, were based on genomic sequencing data from the Network for  
422 Genomic Surveillance South Africa (NGS-SA)(59); and 2) when genomic data were not available,  
423 we used the week with the lowest case number between two waves. The specified calendar  
424 periods are listed in Table S6. During later waves, multiple variants could initially co-circulate  
425 before one became predominant. As a result, the estimated transmissibility tended to increase  
426 before reaching a plateau (see, e.g., Fig 2C). In addition, in a previous study of the Delta  
427 pandemic wave in India (46), we also observed that when many had been infected,  
428 transmissibility could decrease a couple months after the peak, likely due to increased  
429 reinfections for which onward transmission may be reduced. Thus, to obtain a more variant-  
430 specific estimate, we computed the average transmissibility ( $\overline{R_{TX}}$ ) using the weekly  $R_{TX}$   
431 estimates over the 8-week period starting the week prior to the maximal  $R_{TX}$  during each wave;  
432 if no maximum existed (e.g. when a new variant is less transmissible), we simply averaged over  
433 the entire wave. We then computed the change in transmissibility due to a given variant  
434 relative to the ancestral SARS-CoV-2 as  $(\frac{\overline{R_{TX,variant}} - \overline{R_{TX,ancestral}}}{\overline{R_{TX,ancestral}}}) \times 100\%$ .

435

436 To quantify immune erosion, similar to ref (4), we estimated changes in susceptibility over time  
437 and computed the change in immunity as  $\Delta Imm = S_{t+1} - S_t + i_t$ , where  $S_t$  is the susceptibility at  
438 time- $t$  and  $i_t$  is the new infections occurring during each week- $t$ . We sum over all  $\Delta Imm$   
439 estimates for a particular location, during each wave, to compute the total change in immunity  
440 due to a new variant,  $\Sigma \Delta Imm_v$ . Because filter adjustment could also slightly increase  $S$ , to  
441 avoid overestimation, here we only included substantial increases (i.e.,  $\Delta Imm$  per week  $> 0.5\%$   
442 of the total population) when computing changes due to a new variant. As such, we did not  
443 further account for smaller susceptibility increases due to waning immunity [for reference, for a  
444 population that is 50% immune and a 2-year mean immunity period,  $0.5 / (52 \times 2) \times 100\% =$

445 0.48% of the population would lose immunity during a week due to waning immunity]. We  
446 then computed the level of immune erosion as the ratio of  $\Sigma\Delta Imm_v$  to the model-estimated  
447 population immunity prior to the first detection of immune erosion, during each wave. That is,  
448 as opposed to having a common reference of prior immunity, here immune erosion for each  
449 variant depends on the state of the population immune landscape – i.e., combining all prior  
450 exposures and vaccinations – immediately preceding the surge of that variant.

451  
452 For all provinces, model-inference was initiated the week starting March 15, 2020 and run  
453 continuously until the week starting February 27, 2022. To account for model stochasticity, we  
454 repeated the model-inference process 100 times for each province, each with 500 model  
455 realizations and summarized the results from all 50,000 model estimates.

456

### 457 **Model validation using independent data**

458 To compare model estimates with independent observations not assimilated into the model-  
459 inference system, we utilized three relevant datasets:

- 460 1) Serological survey data measuring the prevalence of SARS-CoV-2 antibodies over time.  
461 Multiple serology surveys have been conducted in different provinces of South Africa. The  
462 South African COVID-19 Modelling Consortium summarizes the findings from several of  
463 these surveys (see Fig 1A of ref (60)). We digitized all data presented in Fig 1A of ref (60)  
464 and compared these to corresponding model-estimated cumulative infection rates  
465 (computed mid-month for each corresponding month with a seroprevalence measure).  
466 Due to unknown survey methodologies and challenges adjusting for sero-reversion and  
467 reinfection, we used these data directly (i.e., without adjustment) for qualitative  
468 comparison.
- 469 2) COVID-19-related hospitalization data, from COVID19ZA (38). We aggregated the total  
470 number of COVID-19 hospital admissions during each wave and compared these  
471 aggregates to model-estimated cumulative infection rates during the same wave. Of note,  
472 these hospitalization data were available from June 6, 2020 onwards and are thus  
473 incomplete for the first wave.
- 474 3) Age-adjusted excess mortality data from the South African Medical Research Council  
475 (SAMRC)(20). Deaths due to COVID-19 (used in the model-inference system) are  
476 undercounted. Thus, we also compared model-estimated cumulative infection rates to age-  
477 adjusted excess mortality data during each wave. Of note, excess mortality data were  
478 available from May 3, 2020 onwards and are thus incomplete for the first wave.

479

### 480 **Model validation using retrospective prediction**

481 As a fourth model validation, we generated model predictions at 2 or 1 week before the week  
482 of highest cases for the Delta and Omicron (BA.1) waves, separately, and compared the

483 predicted cases and deaths to reported data unknown to the model. Predicting the peak timing,  
484 intensity, and epidemic turnaround requires accurate estimation of model state variables and  
485 parameters that determine future epidemic trajectories. This is particularly challenging for  
486 South Africa as the pandemic waves tended to progress quickly such that cases surged to a  
487 peak in only 3 to 7 weeks. Thus, we chose to generate retrospective predictions 2 and 1 weeks  
488 before the peak of cases in order to leverage 1 to 6 weeks of new variant data for estimating  
489 epidemiological characteristics. Specifically, for each pandemic wave, we ran the model-  
490 inference system until 2 weeks (or 1 week) before the observed peak of cases, halted the  
491 inference, and used the population susceptibility and transmissibility of the circulating variant  
492 estimated at that time to predict cases and deaths for the remaining weeks (i.e. 10-14 weeks  
493 into the future). Because the infection detection rate and fatality risk are linked to observations  
494 of cases and deaths, changes of these quantities during the prediction period could obscure the  
495 underlying infection rate and accuracy of the prediction. Thus, for these two parameters  
496 specifically, we used model-inference estimates for corresponding weeks to allow comparison  
497 of model-predicted cases and deaths with the data while focusing on testing the accuracy of  
498 other key model estimates (e.g., transmissibility of the new variant). As for the model-  
499 inference, we repeated each prediction 100 times, each with 500 model realizations and  
500 summarized the results from all 50,000 ensemble members.

501  
502 **Data Availability:** All data used in this study are publicly available as described in the “Data  
503 sources and processing” section.

504  
505 **Code availability:** All source code and data necessary for the replication of our results and  
506 figures are publicly available at [https://github.com/wan-yang/covid\\_SouthAfrica](https://github.com/wan-yang/covid_SouthAfrica).

507  
508 **Acknowledgements:** This study was supported by the National Institute of Allergy and  
509 Infectious Diseases (AI145883 and AI163023), the Centers for Disease Control and Prevention  
510 (CK000592), and a gift from the Morris-Singer Foundation.

511  
512 **Author contributions:** WY designed the study (main), conducted the model analyses,  
513 interpreted results, and wrote the first draft. JS designed the study (supporting), interpreted  
514 results, and critically revised the manuscript.

515  
516 **Competing interests:** JS and Columbia University disclose partial ownership of SK Analytics. JS  
517 discloses consulting for BNI.

518  
519 **References:**

- 520 1. Koelle K, Martin MA, Antia R, Lopman B, & Dean NE (2022) The changing epidemiology  
521 of SARS-CoV-2. *Science* 375(6585):1116-1121.
- 522 2. Tegally H, *et al.* (2021) Detection of a SARS-CoV-2 variant of concern in South Africa.  
523 *Nature* 592(7854):438-443.
- 524 3. Viana R, *et al.* (2022) Rapid epidemic expansion of the SARS-CoV-2 Omicron variant in  
525 southern Africa. *Nature*.
- 526 4. Yang W & Shaman J (2021) Development of a model-inference system for estimating  
527 epidemiological characteristics of SARS-CoV-2 variants of concern. *Nature*  
528 *Communications* 12:5573.
- 529 5. Nyberg T, *et al.* (Comparative analysis of the risks of hospitalisation and death  
530 associated with SARS-CoV-2 omicron (B.1.1.529) and delta (B.1.617.2) variants in  
531 England: a cohort study. *The Lancet*.
- 532 6. Wolter N, *et al.* (2022) Early assessment of the clinical severity of the SARS-CoV-2  
533 omicron variant in South Africa: a data linkage study. *The Lancet* 399(10323):437-446.
- 534 7. Madhi SA, *et al.* (2022) Population Immunity and Covid-19 Severity with Omicron  
535 Variant in South Africa. *N Engl J Med* 386(14):1314-1326.
- 536 8. Shinde V, *et al.* (2021) Efficacy of NVX-CoV2373 Covid-19 Vaccine against the B.1.351  
537 Variant. *N Engl J Med* 384(20):1899-1909.
- 538 9. Garcia-Beltran WF, *et al.* (2021) Multiple SARS-CoV-2 variants escape neutralization by  
539 vaccine-induced humoral immunity. *Cell* 184(9):2372-2383 e2379.
- 540 10. Wall EC, *et al.* (2021) Neutralising antibody activity against SARS-CoV-2 VOCs B.1.617.2  
541 and B.1.351 by BNT162b2 vaccination. *Lancet*.
- 542 11. Abu-Raddad LJ, *et al.* (2021) Severity, Criticality, and Fatality of the Severe Acute  
543 Respiratory Syndrome Coronavirus 2 (SARS-CoV-2) Beta Variant. *Clinical Infectious*  
544 *Diseases*.
- 545 12. Public Health England (2021) SARS-CoV-2 variants of concern and variants under  
546 investigation in England. Technical briefing 14.
- 547 13. Allen H, *et al.* (2021) Household transmission of COVID-19 cases associated with SARS-  
548 CoV-2 delta variant (B.1.617.2): national case-control study. *The Lancet regional health.*  
549 *Europe*:100252.
- 550 14. Challen R, *et al.* (2021) Early epidemiological signatures of novel SARS-CoV-2 variants:  
551 establishment of B.1.617.2 in England. *medRxiv*:2021.2006.2005.21258365.
- 552 15. Earnest R, *et al.* (2021) Comparative transmissibility of SARS-CoV-2 variants Delta and  
553 Alpha in New England, USA. *medRxiv*.
- 554 16. Vohringer HS, *et al.* (2021) Genomic reconstruction of the SARS-CoV-2 epidemic in  
555 England. *Nature*.
- 556 17. Dhar MS, *et al.* (2021) Genomic characterization and epidemiology of an emerging SARS-  
557 CoV-2 variant in Delhi, India. *Science*:eabj9932.
- 558 18. Liu C, *et al.* (2021) Reduced neutralization of SARS-CoV-2 B.1.617 by vaccine and  
559 convalescent serum. *Cell* 184(16):4220-+.
- 560 19. de Oliveira T & Lessells R (2021) Update on Delta and other variants in South Africa and  
561 other world.
- 562 20. The South African Medical Research Council (SAMRC) (2021) Report on Weekly Deaths  
563 in South Africa.

- 564 21. Anonymous (South Africa Population (live)).  
565 22. United States Census Bureau (2020) Census Bureau Releases 2020 Demographic Analysis  
566 Estimates.  
567 23. Levin AT, *et al.* (2020) Assessing the age specificity of infection fatality rates for COVID-  
568 19: systematic review, meta-analysis, and public policy implications. *Eur J Epidemiol*  
569 35(12):1123-1138.  
570 24. O’Driscoll M, *et al.* (2021) Age-specific mortality and immunity patterns of SARS-CoV-2.  
571 *Nature* 590(7844):140-145.  
572 25. Anonymous (Variation in the COVID-19 infection-fatality ratio by age, time, and  
573 geography during the pre-vaccine era: a systematic analysis. *The Lancet*.  
574 26. Garcia-Beltran WF, *et al.* (2022) mRNA-based COVID-19 vaccine boosters induce  
575 neutralizing immunity against SARS-CoV-2 Omicron variant. *Cell* 185(3):457-466.e454.  
576 27. Hui KPY, *et al.* (2022) SARS-CoV-2 Omicron variant replication in human bronchus and  
577 lung ex vivo. *Nature*.  
578 28. Rössler A, Riepler L, Bante D, von Laer D, & Kimpel J (2022) SARS-CoV-2 Omicron Variant  
579 Neutralization in Serum from Vaccinated and Convalescent Persons. *New England*  
580 *Journal of Medicine* 386(7):698-700.  
581 29. Cele S, *et al.* (2022) Omicron extensively but incompletely escapes Pfizer BNT162b2  
582 neutralization. *Nature* 602(7898):654-656.  
583 30. Brandal LT, *et al.* (2021) Outbreak caused by the SARS-CoV-2 Omicron variant in Norway,  
584 November to December 2021. *Eurosurveillance* 26(50):2101147.  
585 31. Helmsdal G, *et al.* (2022) Omicron outbreak at a private gathering in the Faroe Islands,  
586 infecting 21 of 33 triple-vaccinated healthcare workers. *Clinical Infectious Diseases*.  
587 32. Cao Y, *et al.* (2022) BA.2.12.1, BA.4 and BA.5 escape antibodies elicited by Omicron  
588 infection. *Nature*.  
589 33. Khan K, *et al.* (2022) Omicron sub-lineages BA.4/BA.5 escape BA.1 infection elicited  
590 neutralizing immunity. *medRxiv:2022.2004.2029.22274477*.  
591 34. Sarah Neville, Burn-Murdoch J, & Smyth J (2022) Covid hospital admissions rise in  
592 Europe as sub-variants fuel new wave.  
593 35. van der Straten K, *et al.* (2022) Mapping the antigenic diversification of SARS-CoV-2.  
594 *medRxiv:2022.2001.2003.21268582*.  
595 36. Mao T, *et al.* (2022) Unadjuvanted intranasal spike vaccine booster elicits robust  
596 protective mucosal immunity against sarbecoviruses. *bioRxiv:2022.2001.2024.477597*.  
597 37. Morens DM, Taubenberger JK, & Fauci AS (2021) Universal Coronavirus Vaccines — An  
598 Urgent Need. *New England Journal of Medicine* 386(4):297-299.  
599 38. Data Science for Social Impact Research Group at University of Pretoria (2021)  
600 Coronavirus COVID-19 (2019-nCoV) Data Repository for South Africa.  
601 39. Iannone R (2020) Package ‘stationaRy’.  
602 40. Iannone R (2020) stationaRy.  
603 41. Wallace J & Hobbs P (2006) *Atmospheric Science: An Introductory survey* (Academic  
604 Press, New York) 2nd Edition Ed p 504.  
605 42. Google Inc. (2020) Community Mobility Reports.  
606 43. Anonymous (2020) Data on COVID-19 (coronavirus) vaccinations by Our World in Data.



- 607 44. Mathieu E, *et al.* (2021) A global database of COVID-19 vaccinations. *Nat Hum Behav*  
608 5(7):947-953.
- 609 45. Department of Health Republic of South Africa (2021) Update on Covid-19 (Tuesday 23  
610 November 2021).
- 611 46. Yang W & Shaman J (2022) COVID-19 pandemic dynamics in India, the SARS-CoV-2 Delta  
612 variant and implications for vaccination. *J R Soc Interface* 19(191):20210900.
- 613 47. Yang W, Shaff J, & Shaman J (2021) Effectiveness of non-pharmaceutical interventions to  
614 contain COVID-19: a case study of the 2020 spring pandemic wave in New York City. *J R*  
615 *Soc Interface* 18(175):20200822.
- 616 48. Lasry A, *et al.* (2020) Timing of Community Mitigation and Changes in Reported COVID-  
617 19 and Community Mobility - Four U.S. Metropolitan Areas, February 26-April 1, 2020.  
618 *MMWR. Morbidity and mortality weekly report* 69(15):451-457.
- 619 49. Kraemer MUG, *et al.* (2020) The effect of human mobility and control measures on the  
620 COVID-19 epidemic in China. *Science* 368(6490):493-497.
- 621 50. Department of Health Republic of South Africa (2021) Latest Vaccine Statistics.
- 622 51. Abu-Raddad LJ, Chemaitelly H, Butt AA, & National Study Group for C-V (2021)  
623 Effectiveness of the BNT162b2 Covid-19 Vaccine against the B.1.1.7 and B.1.351  
624 Variants. *N Engl J Med* 385(2):187-189.
- 625 52. Bernal JL, *et al.* (2021) Effectiveness of Covid-19 Vaccines against the B.1.617.2 (Delta)  
626 Variant. *New England Journal of Medicine* 385(7):585-594.
- 627 53. Andrews N, *et al.* (2021) Effectiveness of COVID-19 vaccines against the Omicron  
628 (B.1.1.529) variant of concern. *medRxiv:2021.2012.2014.21267615*.
- 629 54. Biryukov J, *et al.* (2020) Increasing Temperature and Relative Humidity Accelerates  
630 Inactivation of SARS-CoV-2 on Surfaces. *mSphere* 5(4):e00441-00420.
- 631 55. Morris DH, *et al.* (2021) Mechanistic theory predicts the effects of temperature and  
632 humidity on inactivation of SARS-CoV-2 and other enveloped viruses. *Elife* 10.
- 633 56. Yuan H, Kramer SC, Lau EHY, Cowling BJ, & Yang W (2021) Modeling influenza  
634 seasonality in the tropics and subtropics. *PLoS Comput Biol* 17(6):e1009050.
- 635 57. Yang W, *et al.* (2021) Estimating the infection-fatality risk of SARS-CoV-2 in New York  
636 City during the spring 2020 pandemic wave: a model-based analysis. *The Lancet.*  
637 *Infectious diseases* 21(2):203-212.
- 638 58. Anderson JL (2001) An ensemble adjustment Kalman filter for data assimilation. *Mon.*  
639 *Weather Rev.* 129(12):2884-2903.
- 640 59. The National Institute for Communicable Diseases (NICD) of the National Health  
641 Laboratory (NHLS) on behalf of the Network for Genomics Surveillance in South Africa  
642 (NGS-SA) (2021) Network for Genomic Surveillance South Africa (NGS-SA) SARS-CoV-2  
643 Sequencing Update 19 August 2021.
- 644 60. The South African COVID-19 Modelling Consortium (2021) COVID-19 modelling update:  
645 Considerations for a potential fourth wave (17 Nov 2021).
- 646

647 **Figure Legends:**

648 **Fig 1. Pandemic dynamics in South Africa, model-fit and validation using serology data.** (A)

649 Pandemic dynamics in each of the nine provinces (see legend); dots depict reported weekly  
650 numbers of cases and deaths; lines show model mean estimates (in the same color). (B) For  
651 validation, model estimated infection rates are compared to seroprevalence measures over  
652 time from multiple sero-surveys summarized in ref 60. Boxplots depict the estimated  
653 distribution for each province (middle bar = mean; edges = 50% CrIs) and whiskers (95% CrIs).  
654 Red dots show corresponding measurements. Note that reported mortality was high in  
655 February 2022 in some provinces (see additional discussion in Supplemental Materials).

656

657 **Fig 2. Model validation using retrospective prediction.** Model-inference was trained on cases

658 and deaths data since March 15, 2020 until 2 weeks (1<sup>st</sup> plot in each panel) or 1 week (2<sup>nd</sup> plot)  
659 before the Delta or Omicron (BA.1) wave (see timing on the x-axis); the model was then  
660 integrated forward using the estimates made at the time to predict cases (left panel) and  
661 deaths (right panel) for the remaining weeks of each wave. Blue lines and surrounding shades  
662 show model fitted cases and deaths for weeks before the prediction (line = median, dark blue  
663 area = 50% CrIs, and light blue = 80% CrIs). Red lines show model projected median weekly  
664 cases and deaths; surrounding shades show 50% (dark red) and 80% (light red) CrIs of the  
665 prediction. For comparison, reported cases and deaths for each week are shown by the black  
666 dots; however, those to the right of the vertical dash lines (showing the start of each  
667 prediction) were not used in the model. For clarity, here we show 80% CrIs (instead of 95% CrIs,  
668 which tend to be wider for longer-term projections) and predictions for the four most populous  
669 provinces (Gauteng in A and B; KwaZulu-Natal in C and D; Western Cape in E and F; and Eastern  
670 Cape in G and H). Predictions for the other five provinces are shown in Fig S3.

671

672 **Fig 3. Example model-inference estimates for Gauteng.** (A) Observed relative mobility,  
673 vaccination rate, and estimated disease seasonal trend, compared to case and death rates over  
674 time. Key model-inference estimates are shown for the time-varying effective reproduction  
675 number  $R_t$  (B), transmissibility  $R_{TX}$  (C), population susceptibility (D, shown relative to the  
676 population size in percentage), infection-detection rate (E), and infection-fatality risk (F). Grey  
677 shaded areas indicate the approximate circulation period for each variant. In (B) – (F), blue lines  
678 and surrounding areas show the estimated mean, 50% (dark) and 95% (light) CrIs; boxes and  
679 whiskers show the estimated mean, 50% and 95% CrIs for estimated infection rates. *Note that*  
680 *the transmissibility estimates ( $R_{TX}$  in C) have removed the effects of changing population*  
681 *susceptibility, NPIs, and disease seasonality; thus, the trends are more stable than the*  
682 *reproduction number ( $R_t$  in B) and reflect changes in variant-specific properties. Also note that*  
683 *infection-fatality risk estimates were based on reported COVID-19 deaths and may not reflect*  
684 *true values due to likely under-reporting of COVID-19 deaths.*

685

686 **Fig 4. Model-inferred epidemiological properties for different variants across SA provinces.**

687 Heatmaps show (A) Estimated mean infection rates by week (x-axis) and province (y-axis), (B)  
688 Estimated mean *cumulative* infection numbers relative to the population size in each province,

689 and (C) Estimated population susceptibility (to the circulating variant) by week and province.  
690 (D) Boxplots in the top row show the estimated distribution of increases in transmissibility for  
691 Beta, Delta, and Omicron (BA.1), relative to the Ancestral SARS-CoV-2, for each province  
692 (middle bar = median; edges = 50% CIs; and whiskers =95% CIs); boxplots in the bottom row  
693 show, for each variant, the estimated distribution of immune erosion to all adaptive immunity  
694 gained from infection and vaccination prior to that variant. Red lines show the mean across all  
695 provinces.  
696  
697

698 **Table 1.** Estimated increases in transmissibility and immune erosion potential for Beta, Delta,  
 699 and Omicron (BA.1). The estimates are expressed in percentage for the median (and 95% CIs).  
 700 Note that estimated increases in transmissibility for all three variants are relative to the  
 701 ancestral strain, whereas estimated immune erosion is relative to the composite immunity  
 702 combining all previous infections and vaccinations accumulated until the surge of the new  
 703 variant. See main text and Methods for details.

| Province      | Quantity                       | Beta              | Delta             | Omicron (BA.1)      |
|---------------|--------------------------------|-------------------|-------------------|---------------------|
| All combined  | % Increase in transmissibility | 34.3 (20.5, 48.2) | 47.5 (28.4, 69.4) | 94 (73.5, 121.5)    |
|               | % Immune erosion               | 63.4 (45, 77.9)   | 24.5 (0, 53.2)    | 54.1 (35.8, 70.1)   |
| Gauteng       | % Increase in transmissibility | 42.2 (35.6, 48.3) | 51.8 (44.5, 58.7) | 112.6 (96.2, 131.8) |
|               | % Immune erosion               | 65 (57, 72.2)     | 44.3 (36.4, 54.9) | 64.1 (56, 74.2)     |
| KwaZulu-Natal | % Increase in transmissibility | 29.7 (22.9, 36.6) | 52.5 (44.8, 60.8) | 90.6 (77.9, 102.4)  |
|               | % Immune erosion               | 58.1 (48.3, 71.3) | 17.3 (1.4, 27.6)  | 51.1 (39.3, 58.1)   |
| Western Cape  | % Increase in transmissibility | 23.4 (20.2, 27.4) | 55.2 (48.2, 62.7) | 86.1 (72.6, 102.6)  |
|               | % Immune erosion               | 68.9 (62.5, 76.4) | 41.5 (35.6, 53.5) | 61 (55.5, 67.3)     |
| Eastern Cape  | % Increase in transmissibility | 24.1 (18, 29.7)   | 50.2 (40.5, 57.4) | 78.4 (67.6, 89.2)   |
|               | % Immune erosion               | 54.6 (45.1, 61.2) | 24.2 (15.4, 36.2) | 45.3 (34.5, 57.2)   |
| Limpopo       | % Increase in transmissibility | 32.6 (24.9, 39.8) | 38.9 (31.5, 50.5) | 91.8 (82.6, 102.4)  |
|               | % Immune erosion               | 56.3 (38.4, 76.2) | 1.8 (0, 21.2)     | 42.1 (33.2, 53.2)   |
| Mpumalanga    | % Increase in transmissibility | 31.2 (25.4, 38.6) | 35.3 (24.9, 48.2) | 88.6 (72.8, 104.3)  |
|               | % Immune erosion               | 55.6 (39.8, 70)   | 3.1 (0, 21.7)     | 45.9 (37.7, 55.7)   |
| North West    | % Increase in transmissibility | 43.8 (36.9, 52.1) | 36.8 (25.6, 47.5) | 100 (81.7, 121.1)   |
|               | % Immune erosion               | 67 (58.4, 75.4)   | 12.4 (0.4, 30.5)  | 56.6 (48.2, 68.8)   |
| Free State    | % Increase in transmissibility | 42.7 (35, 49.8)   | 43.8 (31.9, 52.1) | 92.2 (77.4, 106.9)  |
|               | % Immune erosion               | 70 (64.5, 76.2)   | 27.7 (17.6, 41.6) | 57 (49.5, 66.6)     |
| Northern Cape | % Increase in transmissibility | 38.6 (32.6, 44.8) | 63.1 (50.4, 79.2) | 106 (94.7, 119.6)   |
|               | % Immune erosion               | 75 (67.4, 82)     | 47.9 (40.5, 59.1) | 64 (57.3, 72.6)     |

704  
705

706 **Fig 1. Pandemic dynamics in South Africa, model-fit and validation using serology data.** (A)  
 707 Pandemic dynamics in each of the nine provinces (see legend); dots depict reported weekly  
 708 numbers of cases and deaths; lines show model mean estimates (in the same color). (B) For  
 709 validation, model estimated infection rates are compared to seroprevalence measures over  
 710 time from multiple sero-surveys summarized in ref 60. Boxplots depict the estimated  
 711 distribution for each province (middle bar = mean; edges = 50% CIs) and whiskers (95% CIs).  
 712 Red dots show corresponding measurements. Note that reported mortality was high in  
 713 February 2022 in some provinces (see additional discussion in Supplemental Materials).

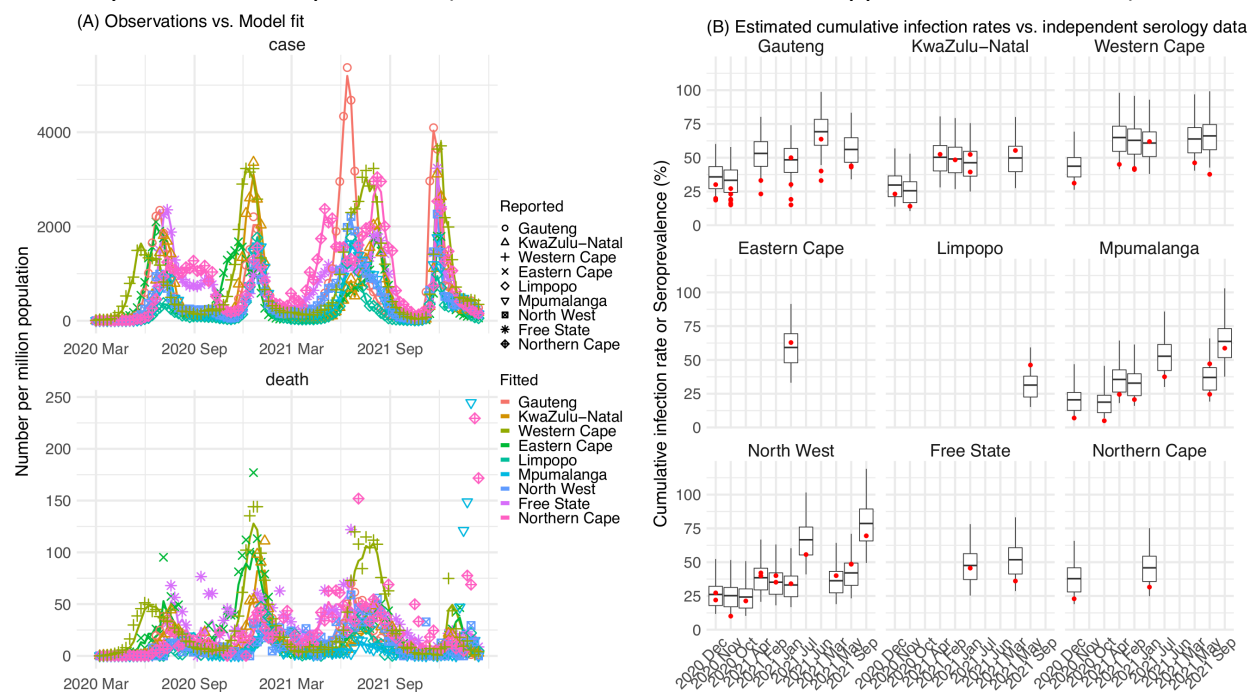

714  
715

716 **Fig 2. Model validation using retrospective prediction.** Model-inference was trained on cases  
717 and deaths data since March 15, 2020 until 2 weeks (1<sup>st</sup> plot in each panel) or 1 week (2<sup>nd</sup> plot)  
718 before the Delta or Omicron (BA.1) wave (see timing on the x-axis); the model was then  
719 integrated forward using the estimates made at the time to predict cases (left panel) and  
720 deaths (right panel) for the remaining weeks of each wave. Blue lines and surrounding shades  
721 show model fitted cases and deaths for weeks before the prediction (line = median, dark blue  
722 area = 50% CrIs, and light blue = 80% CrIs). Red lines show model projected median weekly  
723 cases and deaths; surrounding shades show 50% (dark red) and 80% (light red) CIs of the  
724 prediction. For comparison, reported cases and deaths for each week are shown by the black  
725 dots; however, those to the right of the vertical dash lines (showing the start of each  
726 prediction) were not used in the model. For clarity, here we show 80% CIs (instead of 95% CIs,  
727 which tend to be wider for longer-term projections) and predictions for the four most populous  
728 provinces (Gauteng in A and B; KwaZulu-Natal in C and D; Western Cape in E and F; and Eastern  
729 Cape in G and H). Predictions for the other five provinces are shown in Fig S3.

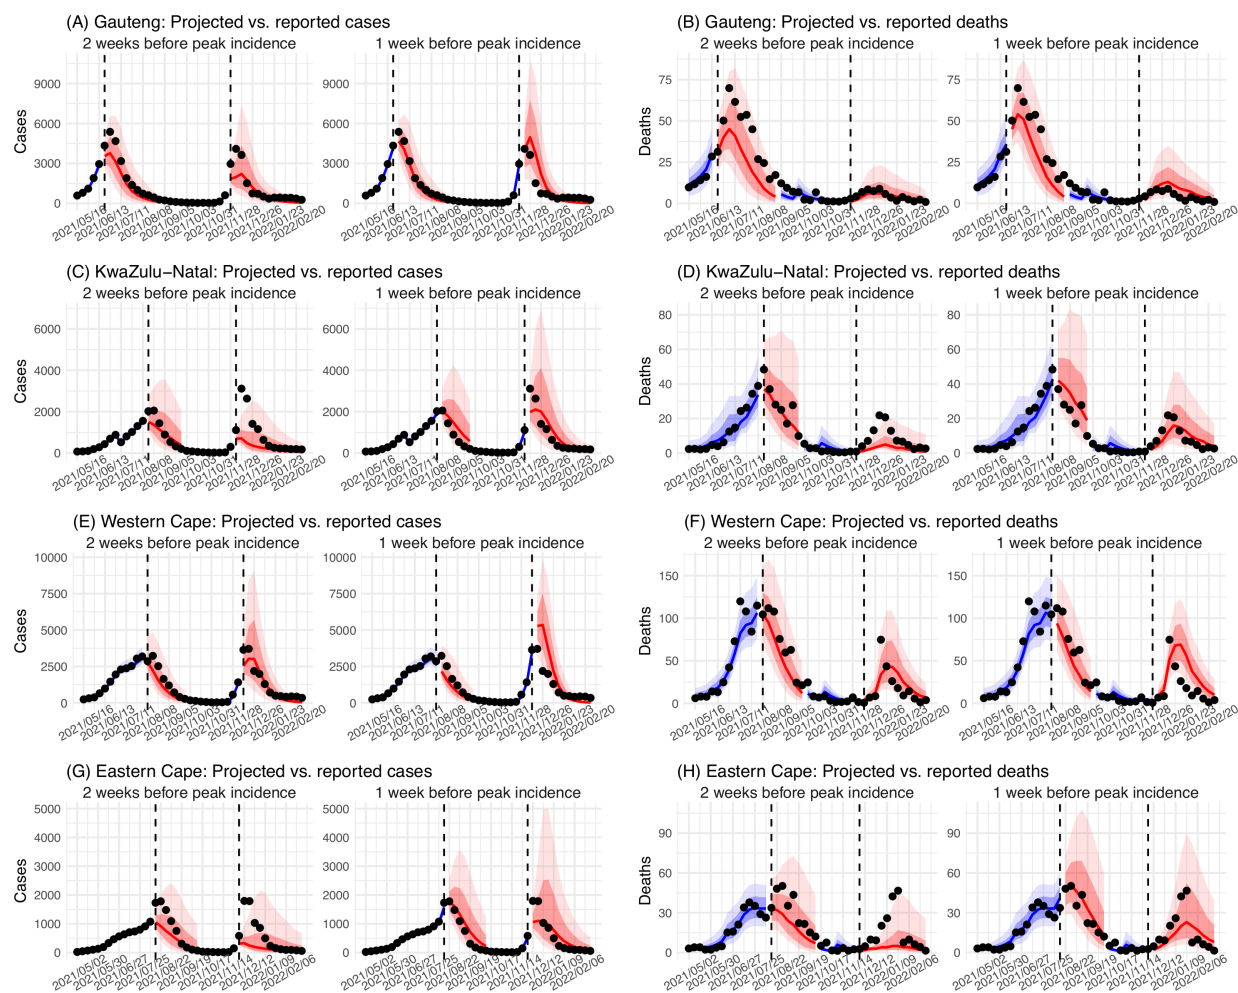

730  
731

732 **Fig 3. Example model-inference estimates for Gauteng.** (A) Observed relative mobility,  
 733 vaccination rate, and estimated disease seasonal trend, compared to case and death rates over  
 734 time. Key model-inference estimates are shown for the time-varying effective reproduction  
 735 number  $R_t$  (B), transmissibility  $R_{TX}$  (C), population susceptibility (D, shown relative to the  
 736 population size in percentage), infection-detection rate (E), and infection-fatality risk (F). Grey  
 737 shaded areas indicate the approximate circulation period for each variant. In (B) – (F), blue lines  
 738 and surrounding areas show the estimated mean, 50% (dark) and 95% (light) Crls; boxes and  
 739 whiskers show the estimated mean, 50% and 95% Crls for estimated infection rates. *Note that*  
 740 *the transmissibility estimates ( $R_{TX}$  in C) have removed the effects of changing population*  
 741 *susceptibility, NPIs, and disease seasonality; thus, the trends are more stable than the*  
 742 *reproduction number ( $R_t$  in B) and reflect changes in variant-specific properties. Also note that*  
 743 *infection-fatality risk estimates were based on reported COVID-19 deaths and may not reflect*  
 744 *true values due to likely under-reporting of COVID-19 deaths.*

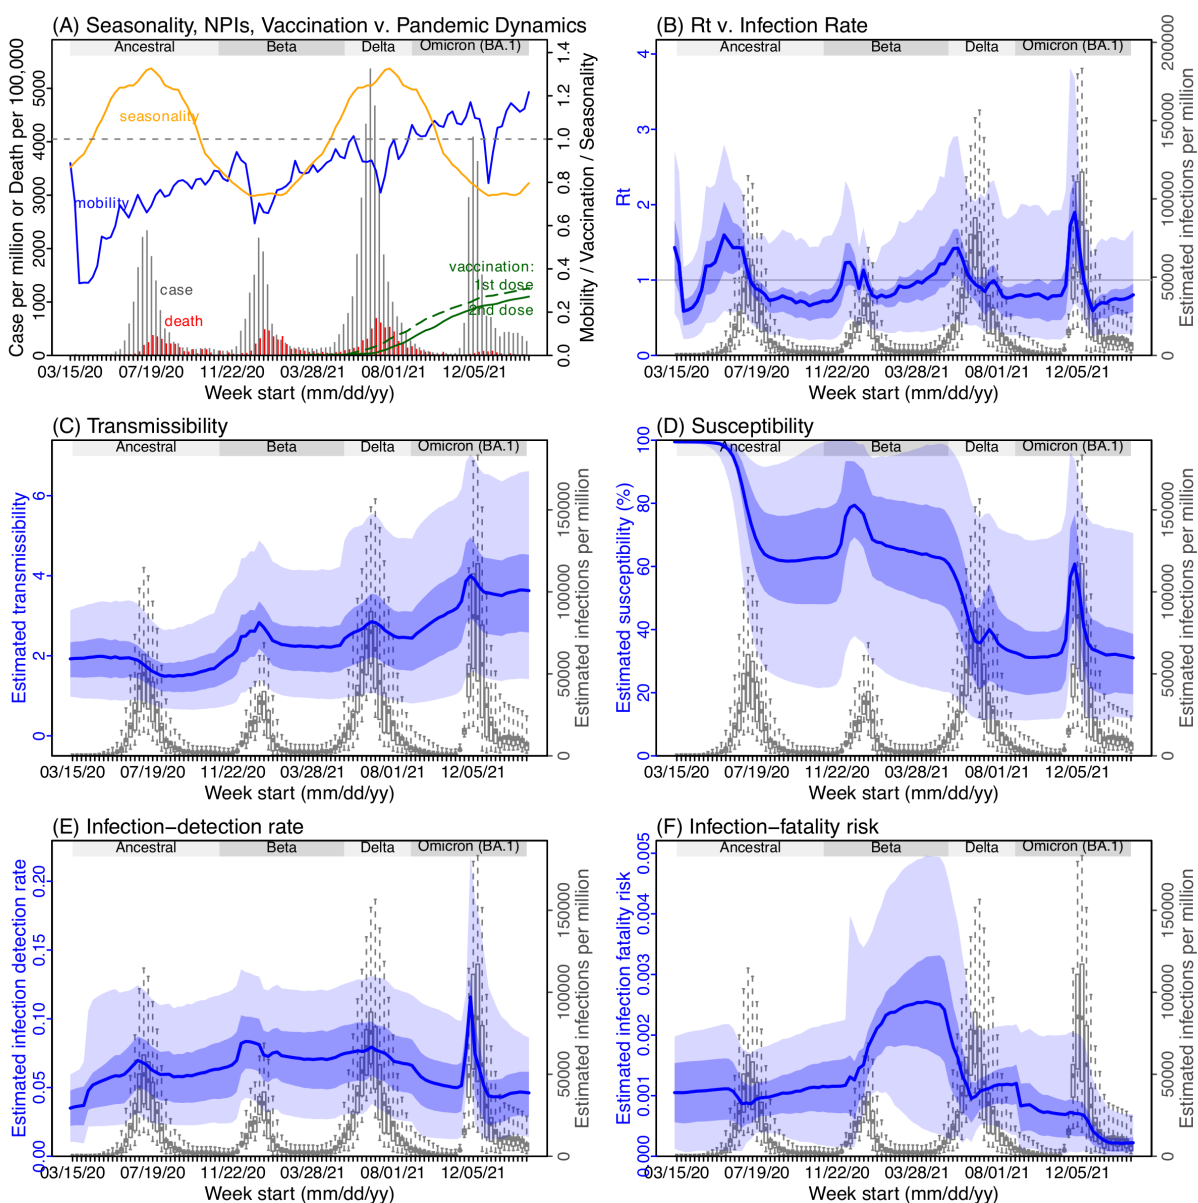

745

746 **Fig 4. Model-inferred epidemiological properties for different variants across SA provinces.**  
 747 Heatmaps show (A) Estimated mean infection rates by week (x-axis) and province (y-axis), (B)  
 748 Estimated mean *cumulative* infection numbers relative to the population size in each province,  
 749 and (C) Estimated population susceptibility (to the circulating variant) by week and province.  
 750 (D) Boxplots in the top row show the estimated distribution of increases in transmissibility for  
 751 Beta, Delta, and Omicron (BA.1), relative to the Ancestral SARS-CoV-2, for each province  
 752 (middle bar = median; edges = 50% CIs; and whiskers =95% CIs); boxplots in the bottom row  
 753 show, for each variant, the estimated distribution of immune erosion to all adaptive immunity  
 754 gained from infection and vaccination prior to that variant. Red lines show the mean across all  
 755 provinces.

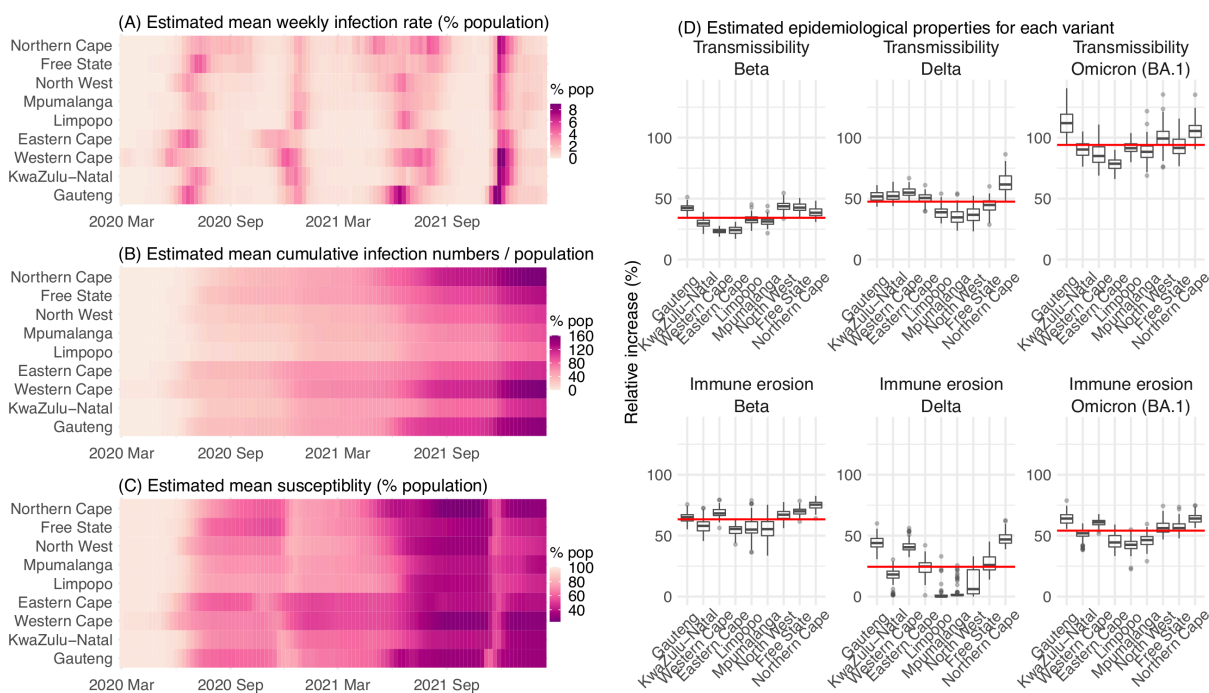

756  
 757  
 758



## **Supplemental Materials**

for

### **COVID-19 pandemic dynamics in South Africa and epidemiological characteristics of three variants of concern (Beta, Delta, and Omicron)**

Wan Yang and Jeffrey Shaman

#### **Supplemental results and discussion**

##### **1. A brief note on reported COVID-19 mortality and model-inference strategy in this study**

COVID-19 mortality data in some South African provinces appeared irregular with very high weekly death counts for some weeks even though cases in preceding weeks were low (see, e.g., COVID-19 related deaths in Mpumalanga and Northern Cape in Fig S1). A likely explanation is the audit and release of mortality data including deaths that occurred in previous time periods, which were not redistributed according to the actual time of death. Such instances have occurred in multiple countries (see, e.g., some of the documentations by Financial Times in ref (1), under the header “SOURCES”). Here, we could not adjust for this possibility due to a lack of information on these apparent data releases. Instead, to account for potential data errors, the ensemble adjustment Kalman filter (EAKF) algorithm (2), used in the model-inference system, includes an estimate of observational error variance for computing the posterior estimates. In this study, the observational error variance was scaled to corresponding observations (thus, weeks with higher mortality would also have larger observational errors). In doing so, the EAKF reduces the weight of observations with larger observational errors (e.g., for weeks with very large death counts), which reduces their impact on the inference of model dynamics. As such, the posterior estimates for mortality tend to (intentionally) miss very high outlying data points (see Fig 1 and Fig S1). In addition, posterior estimates for the infection-fatality risk (IFR) are more stable over time, including for weeks with outlying death counts (see, e.g., Fig S23, IFR estimates for Mpumalanga).

In light of these COVID-19 related mortality data patterns, we computed the overall IFR during each pandemic wave using two methods. The first method computes the wave-specific IFR as the ratio of the total reported COVID-19 related deaths to the model-estimated cumulative infection rate during each wave. Because reported COVID-19 related mortality is used as the numerator, this method is more heavily affected by the aforementioned data irregularities. The second method computes the wave-specific IFR as a weighted average of the weekly IFR estimates during each wave, a measure for which both the numerator and denominator are model-inference derived; the weights are the estimated fraction of infections during each week. As shown in Table S3, for provinces with consistent case and mortality trends (e.g., Gauteng), the two methods generated similar IFR estimates. In contrast, for provinces with

mortality trends inconsistent with case trends (e.g., Mpumalanga), the second method generated IFR estimates more comparable to other provinces than the first method.

## **2. Considerations in parameter prior choice and the EAKF inference algorithm**

The model-inference system included 9 parameters, namely, the variant-specific transmission rate  $\beta_t$ , latency period  $Z_t$ , infectious period  $D_t$ , immunity period  $L_t$ , scaling factor of NPI effectiveness  $e_t$ , infection-detection rate  $r_t$ ,  $IFR_t$ , and two parameters for the distribution of time from infectiousness to case detection (i.e., the mean and standard deviation, for a gamma distribution). The initial prior distributions were randomly drawn from uniform distributions with ranges listed in Table S5. For parameters with previous estimates from the literature (e.g., transmission rate  $\beta$ , incubation period  $Z$ , infectious period  $D$ , and immunity period  $L$ ; see Table S5, column “Source/rationale”), we set the prior range accordingly. For parameters with high uncertainty and spatial variation (e.g., infection-detection rate), we preliminarily tested initial prior ranges by visualizing model prior and posterior estimates, using different ranges. For instance, for the infection-detection rate, when using a higher prior range (e.g., 5 -20% vs. 1 - 10%), the model prior tended to overestimate observed cases and underestimate deaths. Based on the initial testing, we then used a wide range able to reproduce the observed cases and deaths relatively well and then derived estimates of unobserved state variables and parameters.

Importantly, the EAKF used here is an iterative filtering algorithm. After initialization using the initial prior distributions, it iteratively incorporates additional observations at each time step (here, each week) to compute and update the model posterior (including all model state variables and parameters) using the model prior and the latest observations. For the model state variables, the prior is computed per the dynamic model (here, Eqn 1); for the model parameters, the prior is the posterior from the last time step. As such, the influence of the initial prior range tends to be less pronounced compared to methods such as Markov Chain Monte Carlo (MCMC). In addition, to capture potential changes over time (e.g., likely increased detection for variants causing more severe disease), we applied space reprobating (SR) (3), a technique that randomly replaces parameter values for a small fraction of the model ensemble, to explore a wider range of parameter possibilities (Table S5). Due to both the EAKF algorithm and space reprobating, the posterior parameter estimates can migrate outside the initial parameter ranges (e.g., for the transmission rate during the circulation of new variants).

## **3. Testing of the infection-detection rate during the Omicron (BA.1) wave in Gauteng**

A major challenge for this study is inferring the underlying transmission dynamics of the Omicron (BA.1) wave in Gauteng, where Omicron was initially detected and had the earliest case surge. In Gauteng, the number of cases during the first week of reported detection (i.e.,

the week starting 11/21/21) increased 4.4 times relative to the previous week; during the second week of report (i.e., the week starting 11/28/21) cases increased another 4.9 times. Yet after these two weeks of dramatic increases, cases peaked during the third week and started to decline afterwards. Initial testing suggested substantial changes in infection-detection rates during this time; in particular, detection could increase during the first two weeks due to awareness and concern for the novel Omicron variant and decline during later weeks due to constraints on testing capacity as well as subsequent reports of milder disease caused by Omicron. To more accurately estimate the infection-detection rate and underlying transmission dynamics, we ran and compared model-inference estimates using 4 settings for the infection-detection rate.

As noted above, with the model-EAKF filtering algorithm, parameter posterior is iteratively updated and becomes the prior at the next time step such that information from all previous time steps is sequentially incorporated. Given the sequential nature of the EAKF, rather than using a new prior distribution for the infection-detection rate, to explore new state space (here, potential changes in detection rate), we applied SR (3), which randomly assigns the prior values of a small fraction of the model ensemble while preserving the majority that encodes prior information. In previous studies (3, 4), we have showed that the model ensemble posterior would remain similar if there is no substantial change in the system and more efficiently migrate towards new state space if there is a substantial change. Here, to explore potential changes in infection detection rates during the Omicron (BA.1) wave, we tested 4 SR settings for the infection-detection rate: 1) Use of the same baseline range as before (i.e., 1-8%; uniform distribution, same for other ranges) for all weeks during the Omicron (BA.1) wave; 2) Use of a wider and higher range (i.e., 1-12%) for all weeks; 3) Use of a range of 1-15% for the 1<sup>st</sup> week of Omicron reporting (i.e., week starting 11/21/21), 5-20% for the 2<sup>nd</sup> week of Omicron reporting (i.e., the week starting 11/28/21), and 1-8% for the rest; and 4) Use of a range of 5-25% for the 2<sup>nd</sup> week of reporting and 1-8% for all others.

Estimated infection-detection rates in Gauteng increased substantially during the first two weeks of the Omicron (BA.1) wave and decreased afterwards under all four SR settings (Fig S12, 1<sup>st</sup> row). This consistency suggests a general trend in infection-detection rates at the time in accordance with the aforementioned potential changes in testing. Without using a higher SR range (e.g., 1-8% and 1-12% in columns 1-2 of Fig S12 vs 5-20% and 5-25% for week 2 in columns 3-4), the estimated increases in infection-detection rate were lower; instead, the model-inference system attributed the dramatic case increases in the first two weeks to higher increases in population susceptibility and transmissibility (Fig S12, 2<sup>nd</sup> and 3<sup>rd</sup> row, compare columns 1-2 vs. 3-4). However, the higher estimates for population susceptibility and transmissibility contradicted with the drastic decline in cases shortly afterwards such that the

model-inference system readjusted the transmissibility to a lower level during later weeks (see the uptick in estimated transmissibility in Fig S12, 3<sup>rd</sup> row, first 2 columns). In contrast, when higher infection-detection rates were estimated for the first two weeks using the last two SR settings, the transmissibility estimates were more stable during later weeks (Fig S12, 3<sup>rd</sup> row, last 2 columns). In addition, model-inference using the latter two SR settings also generated more accurate retrospective predictions for the Omicron (BA.1) wave in Gauteng (Fig S13).

Given the above results, we used the 4<sup>th</sup> SR setting in the model-inference for Gauteng (i.e., replace a fraction of the infection detection rate using values randomly drawn from U[5%, 25%] for the week starting 11/28/21 and U[1%, 8%] for all other weeks during the Omicron wave). Reported cases in other provinces did not change as dramatically as in Gauteng; therefore, for those provinces, we used the baseline setting, i.e., values drawn from U[1%, 8%], for re-probing the infection-detection rate. Nonetheless, we note that the overall estimates for changes in transmissibility and immune erosion of Omicron (BA.1) were slightly higher under the first two SR settings but still consistent with the results presented in the main text (Fig S14).

#### **4. Examination of posterior estimates for all model parameters**

To diagnose posterior estimates for each parameter, we plotted the posterior median, 50% and 95% credible intervals (CrIs) estimated for each week during the entire study period, for each of the nine provinces (Figs. S15 – S23). As shown in Fig S15, the estimated transmission rate was relatively stable during the ancestral wave; it then increased along with the surge of the Beta variant around October 2020 and leveled off during the Beta wave. Similarly, following the initial surge of the Delta and Omicron variants, estimated transmission rates increased before leveling off when the new variant became predominant. Similar patterns are estimated for all provinces, indicating the model-inference system is able to capture the changes in transmission rate due to each new variant.

Estimated latent period (Fig S16), infectious period (Fig S17), immunity period (Fig S18), and the scaling factor of NPI effectiveness (Fig S19) all varied somewhat over time, but to a much less extent compared to the transmission rate. Estimated time from infectiousness to case detection decreased slightly over time, albeit with larger variations in later time periods (see Fig S20 for the mean and Fig S21 for the standard deviation). It is possible that the model-inference system could not adequately estimate the nuanced changes in these parameters using aggregated population level data.

Estimated infection-detection rates varied over time for all provinces (Fig S22). The infection-detection rate can be affected by 1) testing capacity, e.g., lower during the first weeks of the COVID-19 pandemic, and sometimes lower near the peak of a pandemic wave when maximal

capacity was reached; 2) awareness of the virus, e.g., higher when a new variant was first reported and lower near the end of a wave; and 3) disease severity, e.g., higher when variants causing more severe disease were circulating. Overall, the estimates were consistent with these expected patterns.

Lastly, estimated IFRs also varied over time and across provinces (Fig S23). IFR can be affected by multiple factors, including infection demographics, innate severity of the circulating variant, quality and access to healthcare, and vaccination coverage. For infection demographics, IFR tended to be much lower in younger ages as reported by many (e.g., Levin et al. 2020 (5)). In South Africa, similar differences in infection demographics occurred across provinces. For instance, Giandhari et al. (6) noted a lower initial mortality in Gauteng, as earlier infections concentrated in younger and wealthier individuals. For the innate severity of the circulating variant, as noted in the main text, in general estimated IFRs were higher during the Beta and Delta waves than during the Omicron wave. In addition, as shown in Fig S23, estimated IFRs were substantially higher in four provinces (i.e., KwaZulu-Natal, Western Cape, Eastern Cape, and Free State) than other provinces during the Beta wave. Coincidentally, the earliest surges of the Beta variant occurred in three of those provinces (i.e., KwaZulu-Natal, Western Cape, Eastern Cape)(7). Nonetheless, and as noted in the main text and the above subsection, the IFR estimates here should be interpreted with caution, due to the likely underreporting and irregularity of the COVID-19 mortality data used to generate these estimates.

### **5. A proposed approach to compute the reinfection rates using model-inference estimates.**

It is difficult to measure or estimate reinfection rate directly. In this study, we have estimated the immune erosion potential for three major SARS-CoV-2 variants of concern (VOCs) and the infection rates during each pandemic wave in South Africa. These estimates can be used to support estimation of the reinfection rate for a given population. In-depth analysis is needed for such estimations. Here, as an example, we propose a simple approach to illustrate the possibility.

Consider the estimation in the context of the four waves in South Africa in this study (i.e., ancestral, Beta, Delta, and Omicron BA.1 wave). Suppose the cumulative fraction of the population *ever infected before the beta wave* is  $c_{pre\_beta}$  (*this is roughly the attack rate during the ancestral wave*) and estimated immune erosion potential for Beta is  $\theta_{beta}$ . To compute the reinfection rate during the Beta wave, we can assume that  $c_{pre\_beta} \times (1 - \theta_{beta})$  are protected by this prior immunity, and that the remaining  $c_{pre\_beta} \theta_{beta}$  (i.e. those lost their immunity due to immune erosion) have the same risk of infection as those never infected, such that the reinfection rate/fraction *among all infections*,  $z_{beta}$ , during the Beta wave (i.e.,  $z_{beta}$  is the attack rate by Beta) would be:

$$\eta_{beta} = \frac{c_{pre\_beta} \theta_{beta}}{1 - c_{pre\_beta} + c_{pre\_beta} \theta_{beta}}$$

The reinfection rate/fraction among the entire population would be:

$$\eta'_{beta} = z_{beta} \eta_{beta}$$

Combining the above, the cumulative fraction of the population *ever infected by the end of the Beta wave and before the Delta wave* would be:

$$c_{pre\_delta} = c_{pre\_beta} + z_{beta} - \eta'_{beta}$$

Note that the fraction of the population *ever infected*,  $c$ , is updated to compute the subsequent fraction of the population protected by prior immunity, because the immune erosion potential here is estimated relative to the combined immunity accumulated until the rise of a new variant. We can repeat the above process for the Delta wave and the Omicron wave. See an example calculation in Table S4.

Work to refine the reinfection estimates (e.g., sensitivity of these estimates to assumptions and uncertainty intervals) is needed. Nonetheless, these example estimates (Table S4) are consistent with reported serology measures [4<sup>th</sup> column vs. e.g. ~90% seropositive in March 2022 after the Omicron BA.1 wave reported in Bingham et al. 2022 (8)] and reinfection rates reported elsewhere [5<sup>th</sup> and 6<sup>th</sup> columns vs. e.g., reported much higher reinfection rate during the Omicron wave in Pulliam et al. (9)]. Importantly, these estimates also show that, in addition to the innate immune erosive potential of a given new variant, the reinfection rate is also determined by the prior cumulative fraction of the population ever infected (4<sup>th</sup> column in Table S4) and the attack rate by each variant (3<sup>rd</sup> column in Table S4). That is, the higher the prior cumulative infection rate and/or the higher the attack rate by the new variant, the higher the reinfection rate would be for a new variant that can cause reinfection. For instance, despite the lower immune erosion potential of Delta than Beta, because of the high prior infection rate accumulated up to the Delta wave onset, the estimated reinfection rate by Delta *among all Delta infections* was higher compared to that during the Beta wave (6<sup>th</sup> column in Table S4). With the higher attack rate during the Delta wave, the reinfection rate *among the entire population* was much higher for Delta than Beta (5<sup>th</sup> column in Table S4). Thus, these preliminary results suggest that reinfection rates observed for each variant and differences across different variants should be interpreted in the context of the innate immune erosion potential of each variant, the prior cumulative infection rate of the study population, and the attack rate of each variant in the same population.

Reference:

1. FT Visual & Data Journalism team (Coronavirus tracked: see how your country compares).
2. Anderson JL (2001) An ensemble adjustment Kalman filter for data assimilation. *Mon. Weather Rev.* 129(12):2884-2903.
3. Yang W & Shaman J (2014) A simple modification for improving inference of non-linear dynamical systems. *arXiv*:1403.6804.
4. Yang W & Shaman J (2021) Development of a model-inference system for estimating epidemiological characteristics of SARS-CoV-2 variants of concern. *Nature Communications* 12:5573.
5. Levin AT, *et al.* (2020) Assessing the age specificity of infection fatality rates for COVID-19: systematic review, meta-analysis, and public policy implications. *Eur J Epidemiol* 35(12):1123-1138.
6. Giandhari J, *et al.* (2021) Early transmission of SARS-CoV-2 in South Africa: An epidemiological and phylogenetic report. *Int J Infect Dis* 103:234-241.
7. Tegally H, *et al.* (2021) Detection of a SARS-CoV-2 variant of concern in South Africa. *Nature* 592(7854):438-443.
8. Bingham J, *et al.* (2022) Estimates of prevalence of anti-SARS-CoV-2 antibodies among blood donors in South Africa in March 2022.
9. Pulliam JRC, *et al.* (2022) Increased risk of SARS-CoV-2 reinfection associated with emergence of Omicron in South Africa. *Science* 376(6593):eabn4947.

## Supplemental Figures and Tables

**Fig S1.** Model-fit to case and death data in each province. Dots show reported SARS-CoV-2 cases and deaths by week. Blue lines and surrounding area show model estimated median, 50% (darker blue) and 95% (lighter blue) credible intervals. Note that reported mortality was high in February 2022 in some provinces with no clear explanation.

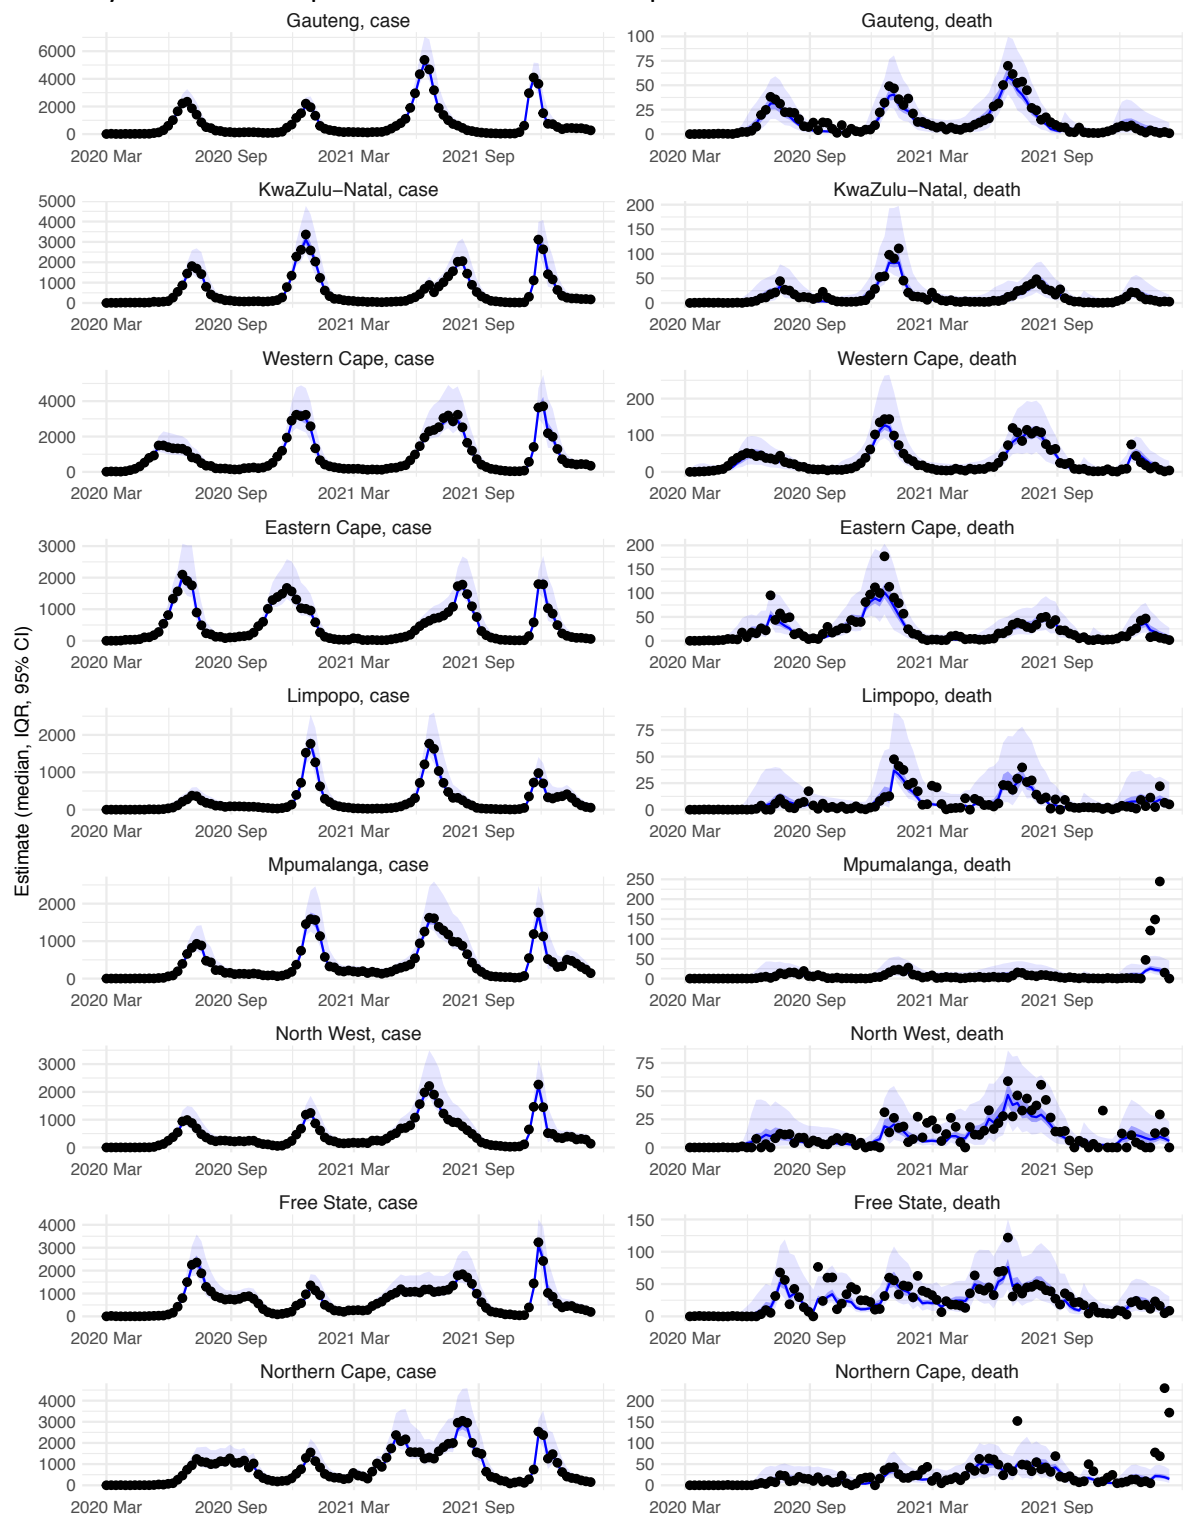



**Fig S2. Model validation using hospitalization and excess mortality data.** Model estimated infection rates are compared to COVID-related hospitalizations (left panel) and excess mortality (right panel) during the Ancestral (A), Beta (B), Delta (C), and Omicron (D) waves. Boxplots show the estimated distribution for each province (middle bar = mean; edges = 50% CrIs and whiskers =95% CrIs). Red dots show COVID-related hospitalizations (left panel, right y-axis) and excess mortality (right panel, right y-axis); these are independent measurements *not* used for model fitting. Correlation ( $r$ ) is computed between model estimates (i.e., median cumulative infection rates for the nine provinces) and the independent measurements (i.e., hospitalizations in the nine provinces in left panel, and age-adjusted excess mortality in the right panel), for each wave. *Note that hospitalization data begin from 6/6/20 and excess mortality data begin from 5/3/20 and thus are incomplete for the ancestral wave.*

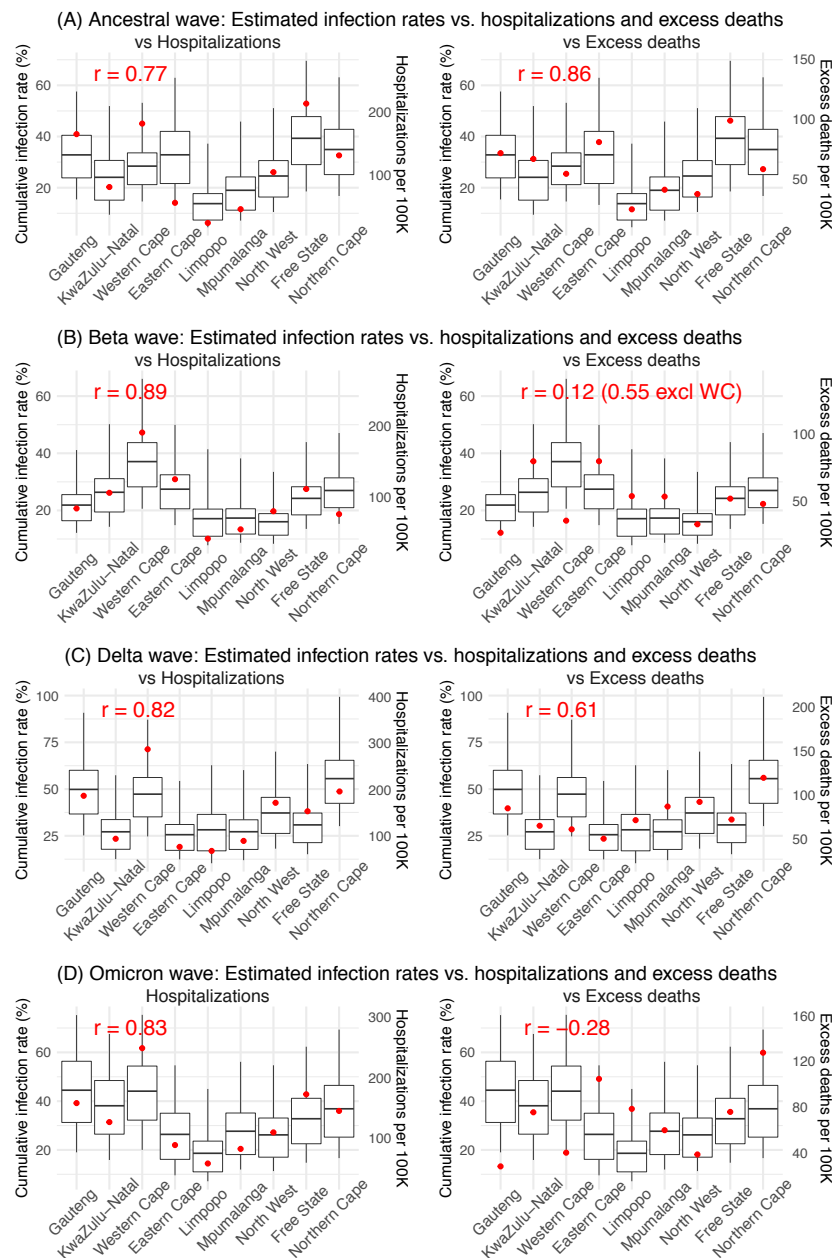

**Fig S3. Model validation using retrospective prediction, for the remaining 5 provinces.** Model-inference was trained on cases and deaths data since March 15, 2020 until 2 weeks (1<sup>st</sup> plot in each panel) or 1 week (2<sup>nd</sup> plot) before the Delta or Omicron wave (see timing on the x-axis); the model was then integrated forward using the estimates made at the time to predict cases (left panel) and deaths (right panel) for the remaining weeks of each wave. Blue lines and surrounding shades show model fitted cases and deaths for weeks before the prediction (line = median, dark blue area = 50% CrIs, and light blue = 80% CrIs). Red lines show model projected median weekly cases and deaths; surrounding shades show 50% (dark red) and 80% (light red) CrIs of the prediction. For comparison, reported cases and deaths for each week are shown by the black dots; however, those to the right of the vertical dash lines (showing the start of each prediction) were not used in the model. For clarity, here we show 80% CrIs (instead of 95% CrIs, which tend to be wider for longer-term projections) and predictions for the five least populous provinces (Limpopo in A and B; Mpumalanga in C and D; North West in E and F; Free State in G and H; and Northern Cape in I and J). Predictions for the other 4 provinces are shown in Fig 2.

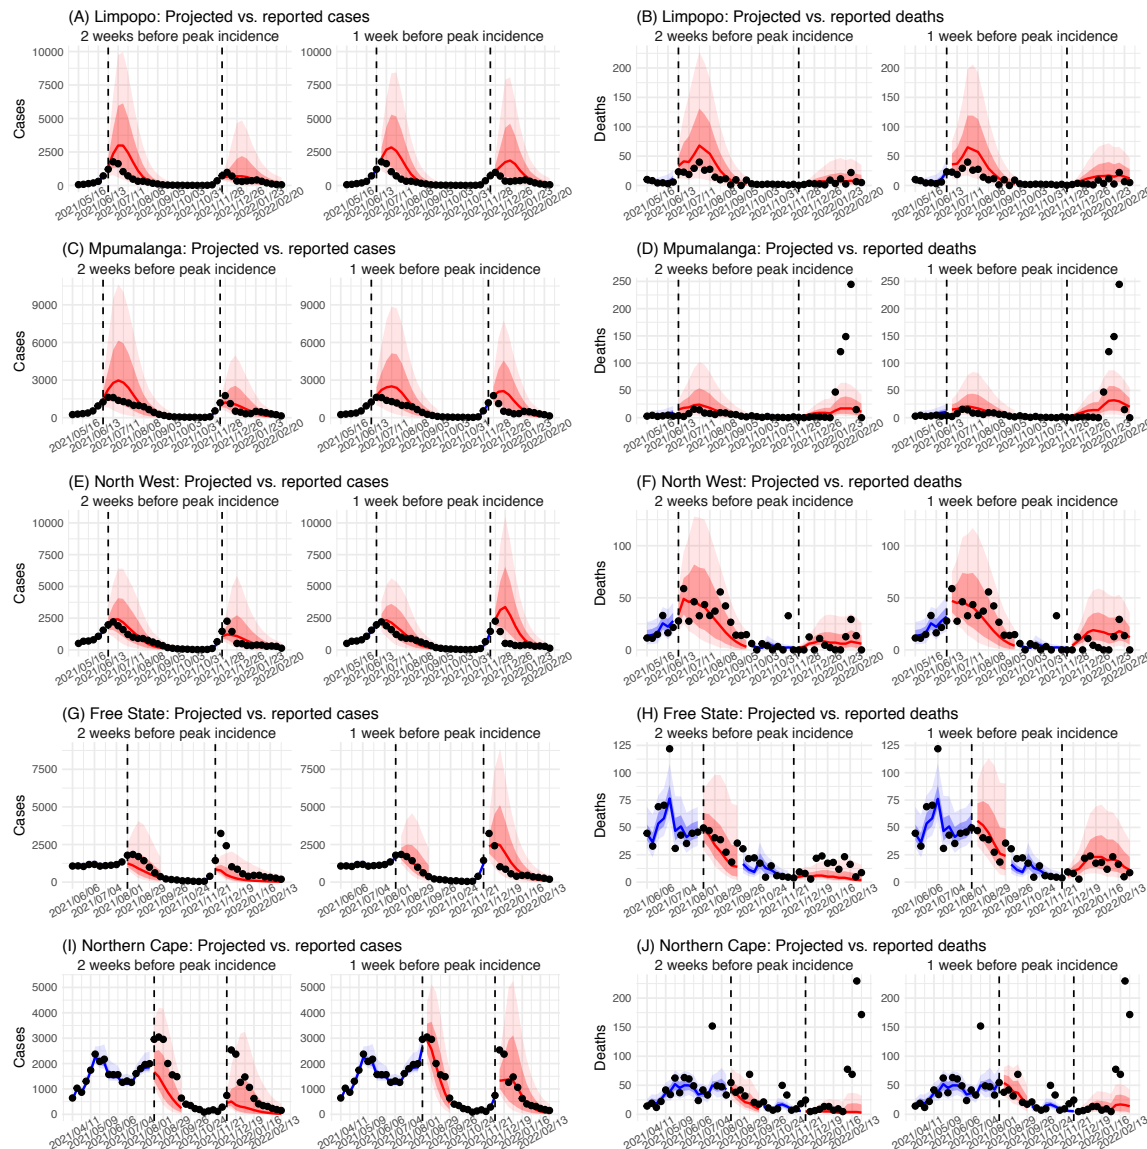

**Fig S4. Model inference estimates for KwaZulu-Natal.** (A) Observed relative mobility, vaccination rate, and estimated disease seasonal trend, compared to case and death rates over time. Key model-inference estimates are shown for the time-varying effective reproduction number  $R_t$  (B), transmissibility  $R_{TX}$  (C), population susceptibility (D, shown relative to the population size in percentage), infection-detection rate (E), and infection-fatality risk (F). Grey shaded areas indicate the approximate circulation period for each variant. In (B) – (F), blue lines and surrounding areas show the estimated mean, 50% (dark) and 95% (light) CrIs; boxes and whiskers show the estimated mean, 50% and 95% CrIs for estimated infection rates. *Note that the transmissibility estimates ( $R_{TX}$  in C) have removed the effects of changing population susceptibility, NPIs, and disease seasonality; thus, the trends are more stable than the reproduction number ( $R_t$  in B) and reflect changes in variant-specific properties. Also note that infection-fatality risk estimates were based on reported COVID-19 deaths and may not reflect true values due to likely under-reporting of COVID-19 deaths.*

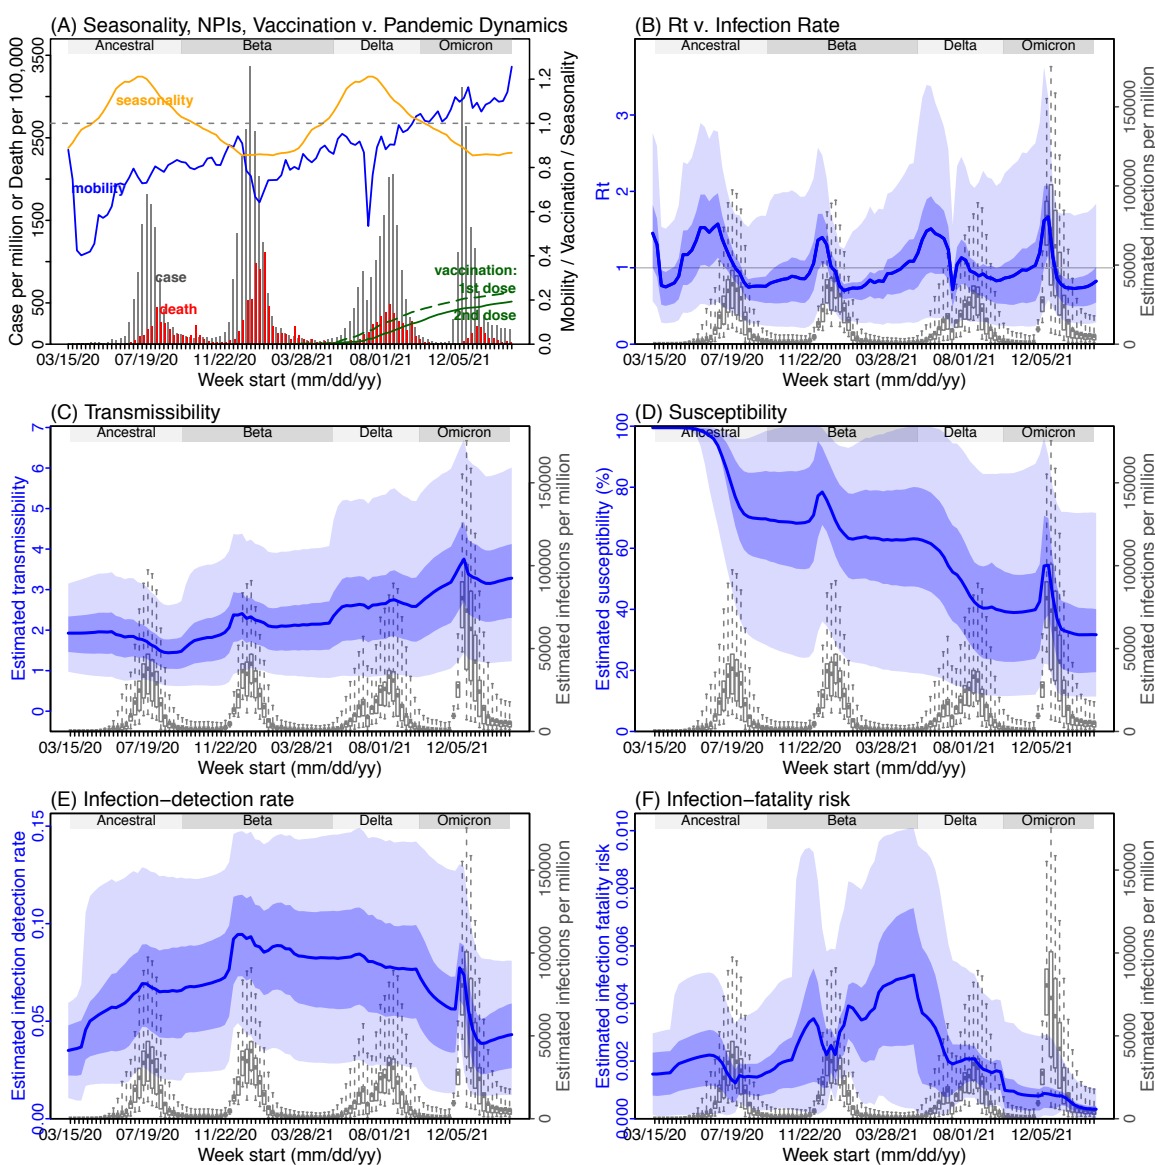

**Fig S5. Model inference estimates for Western Cape.** (A) Observed relative mobility, vaccination rate, and estimated disease seasonal trend, compared to case and death rates over time. Key model-inference estimates are shown for the time-varying effective reproduction number  $R_t$  (B), transmissibility  $R_{TX}$  (C), population susceptibility (D, shown relative to the population size in percentage), infection-detection rate (E), and infection-fatality risk (F). Grey shaded areas indicate the approximate circulation period for each variant. In (B) – (F), blue lines and surrounding areas show the estimated mean, 50% (dark) and 95% (light) CrIs; boxes and whiskers show the estimated mean, 50% and 95% CrIs for estimated infection rates. *Note that the transmissibility estimates ( $R_{TX}$  in C) have removed the effects of changing population susceptibility, NPIs, and disease seasonality; thus, the trends are more stable than the reproduction number ( $R_t$  in B) and reflect changes in variant-specific properties. Also note that infection-fatality risk estimates were based on reported COVID-19 deaths and may not reflect true values due to likely under-reporting of COVID-19 deaths.*

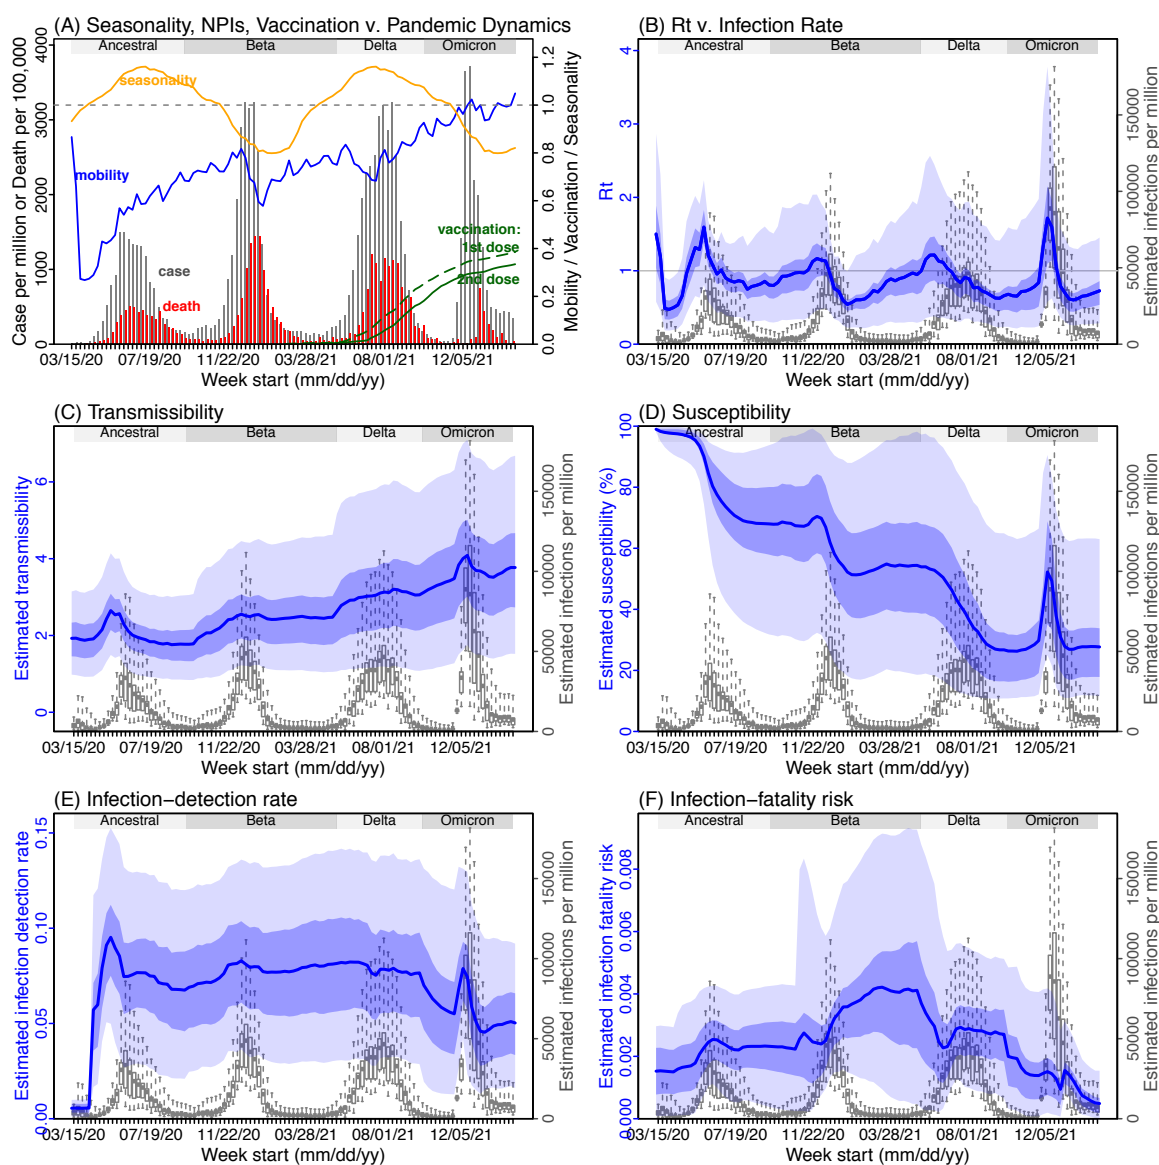

**Fig S6. Model inference estimates for Eastern Cape.** (A) Observed relative mobility, vaccination rate, and estimated disease seasonal trend, compared to case and death rates over time. Key model-inference estimates are shown for the time-varying effective reproduction number  $R_t$  (B), transmissibility  $R_{TX}$  (C), population susceptibility (D, shown relative to the population size in percentage), infection-detection rate (E), and infection-fatality risk (F). Grey shaded areas indicate the approximate circulation period for each variant. In (B) – (F), blue lines and surrounding areas show the estimated mean, 50% (dark) and 95% (light) CRIs; boxes and whiskers show the estimated mean, 50% and 95% CRIs for estimated infection rates. *Note that the transmissibility estimates ( $R_{TX}$  in C) have removed the effects of changing population susceptibility, NPIs, and disease seasonality; thus, the trends are more stable than the reproduction number ( $R_t$  in B) and reflect changes in variant-specific properties. Also note that infection-fatality risk estimates were based on reported COVID-19 deaths and may not reflect true values due to likely under-reporting of COVID-19 deaths.*

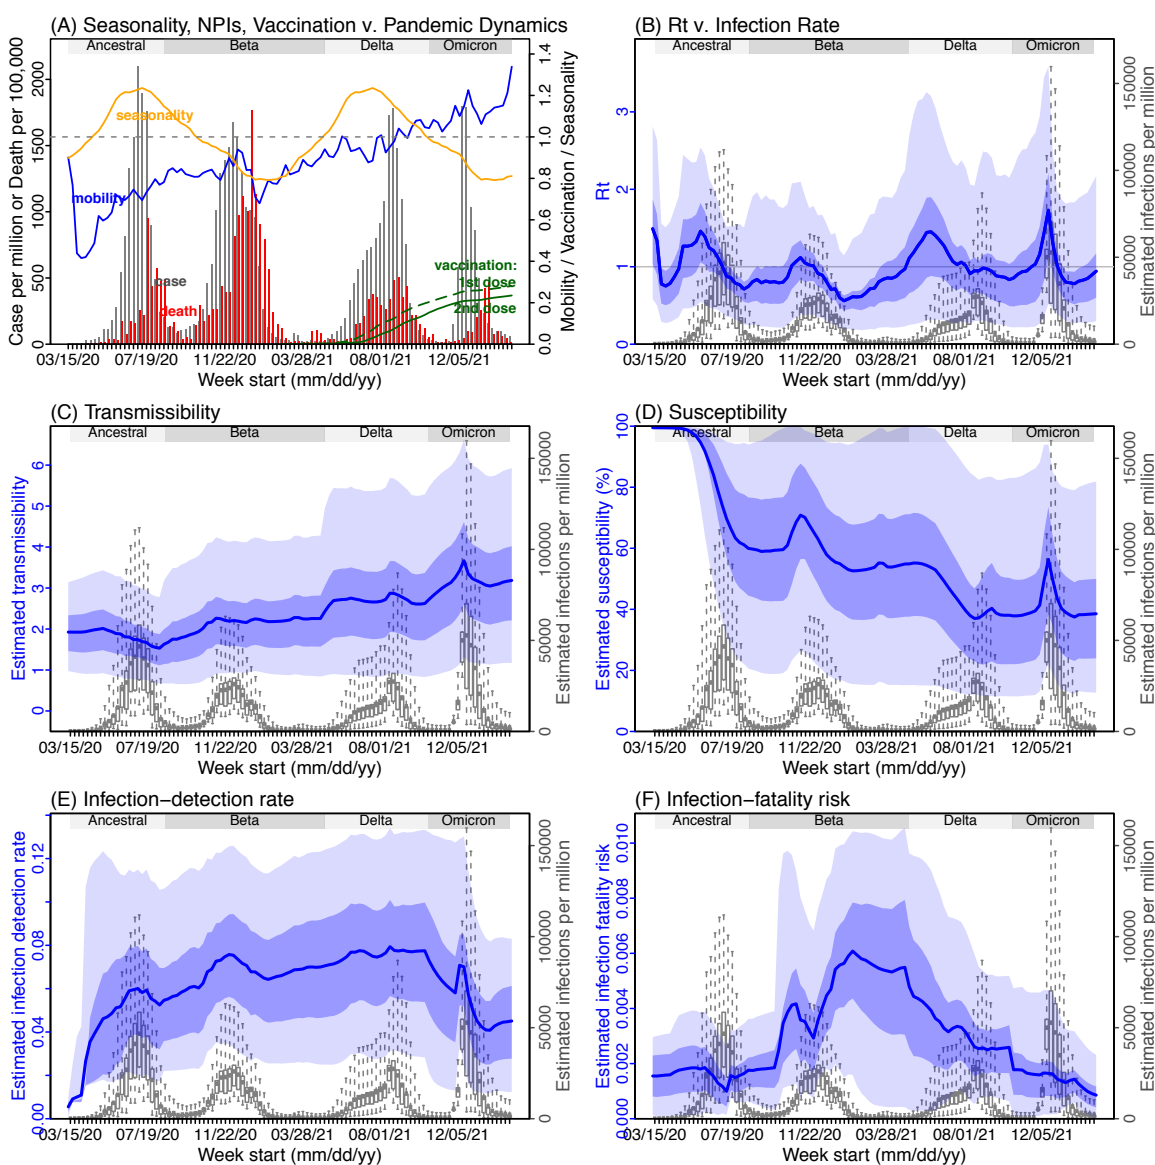

**Fig S7. Model inference estimates for Limpopo.** (A) Observed relative mobility, vaccination rate, and estimated disease seasonal trend, compared to case and death rates over time. Key model-inference estimates are shown for the time-varying effective reproduction number  $R_t$  (B), transmissibility  $R_{TX}$  (C), population susceptibility (D, shown relative to the population size in percentage), infection-detection rate (E), and infection-fatality risk (F). Grey shaded areas indicate the approximate circulation period for each variant. In (B) – (F), blue lines and surrounding areas show the estimated mean, 50% (dark) and 95% (light) CRIs; boxes and whiskers show the estimated mean, 50% and 95% CRIs for estimated infection rates. *Note that the transmissibility estimates ( $R_{TX}$  in C) have removed the effects of changing population susceptibility, NPIs, and disease seasonality; thus, the trends are more stable than the reproduction number ( $R_t$  in B) and reflect changes in variant-specific properties. Also note that infection-fatality risk estimates were based on reported COVID-19 deaths and may not reflect true values due to likely under-reporting of COVID-19 deaths.*

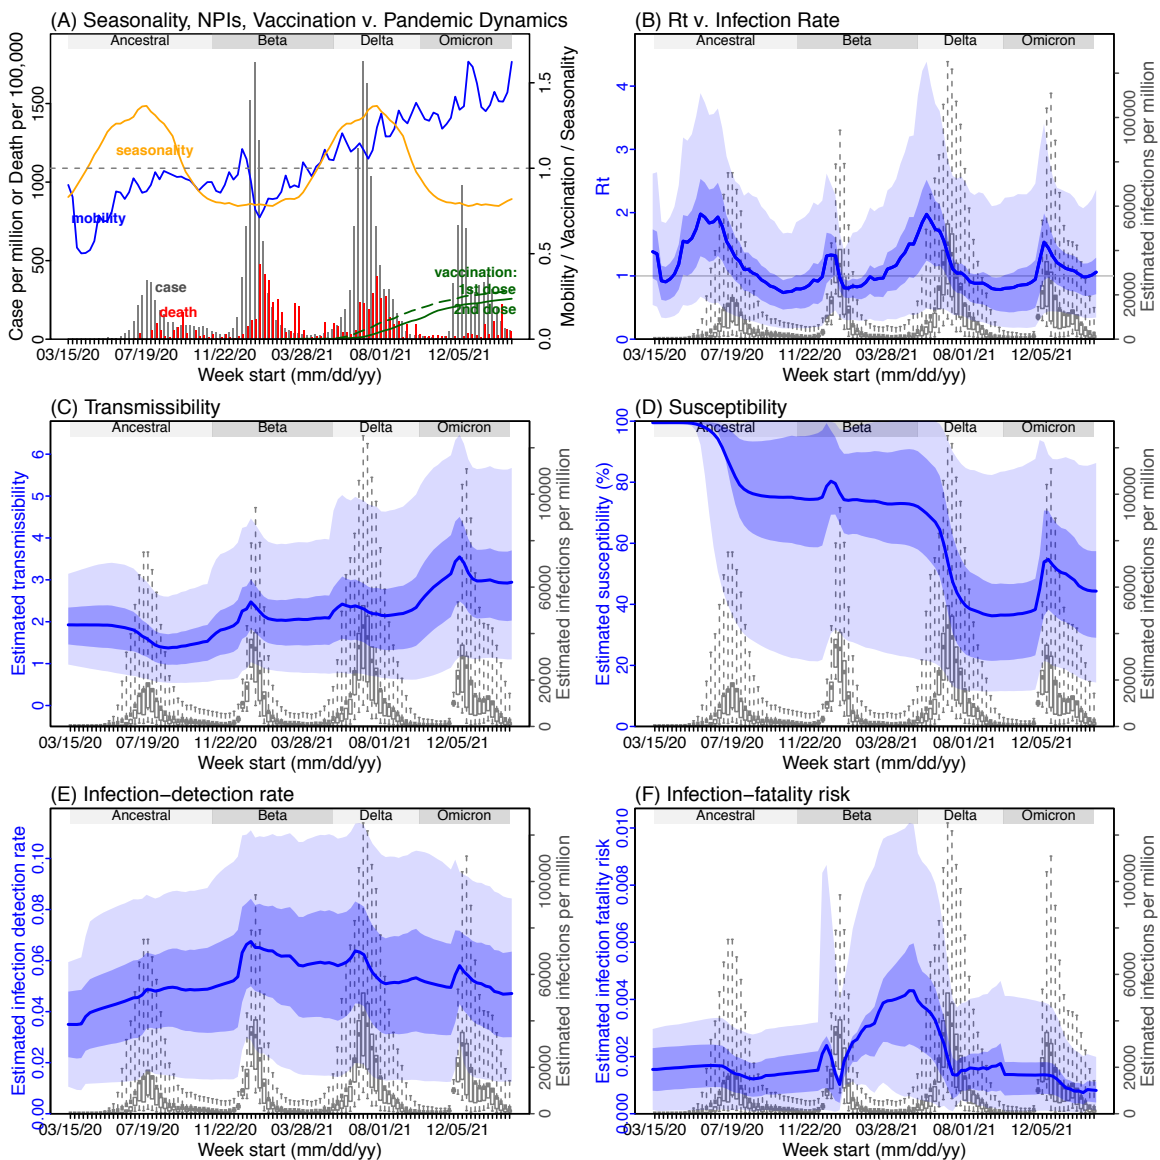

**Fig S8. Model inference estimates for Mpumalanga.** (A) Observed relative mobility, vaccination rate, and estimated disease seasonal trend, compared to case and death rates over time. Key model-inference estimates are shown for the time-varying effective reproduction number  $R_t$  (B), transmissibility  $R_{TX}$  (C), population susceptibility (D, shown relative to the population size in percentage), infection-detection rate (E), and infection-fatality risk (F). Grey shaded areas indicate the approximate circulation period for each variant. In (B) – (F), blue lines and surrounding areas show the estimated mean, 50% (dark) and 95% (light) CrIs; boxes and whiskers show the estimated mean, 50% and 95% CrIs for estimated infection rates. *Note that the transmissibility estimates ( $R_{TX}$  in C) have removed the effects of changing population susceptibility, NPIs, and disease seasonality; thus, the trends are more stable than the reproduction number ( $R_t$  in B) and reflect changes in variant-specific properties. Also note that infection-fatality risk estimates were based on reported COVID-19 deaths and may not reflect true values due to likely under-reporting of COVID-19 deaths.*

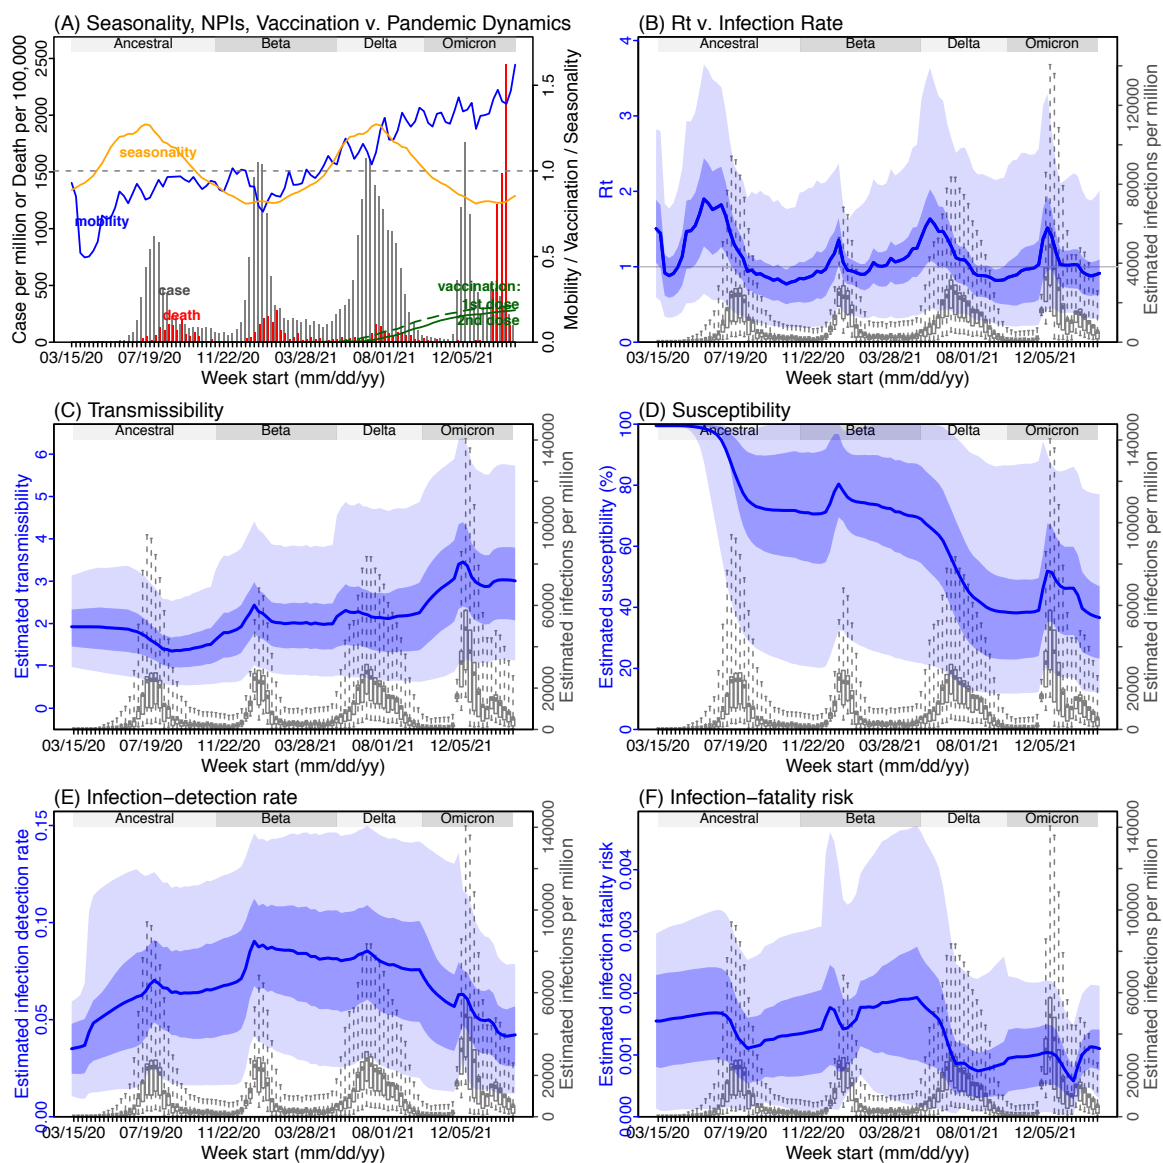

**Fig S9. Model inference estimates for North West.** (A) Observed relative mobility, vaccination rate, and estimated disease seasonal trend, compared to case and death rates over time. Key model-inference estimates are shown for the time-varying effective reproduction number  $R_t$  (B), transmissibility  $R_{TX}$  (C), population susceptibility (D, shown relative to the population size in percentage), infection-detection rate (E), and infection-fatality risk (F). Grey shaded areas indicate the approximate circulation period for each variant. In (B) – (F), blue lines and surrounding areas show the estimated mean, 50% (dark) and 95% (light) CRIs; boxes and whiskers show the estimated mean, 50% and 95% CRIs for estimated infection rates. *Note that the transmissibility estimates ( $R_{TX}$  in C) have removed the effects of changing population susceptibility, NPIs, and disease seasonality; thus, the trends are more stable than the reproduction number ( $R_t$  in B) and reflect changes in variant-specific properties. Also note that infection-fatality risk estimates were based on reported COVID-19 deaths and may not reflect true values due to likely under-reporting of COVID-19 deaths.*

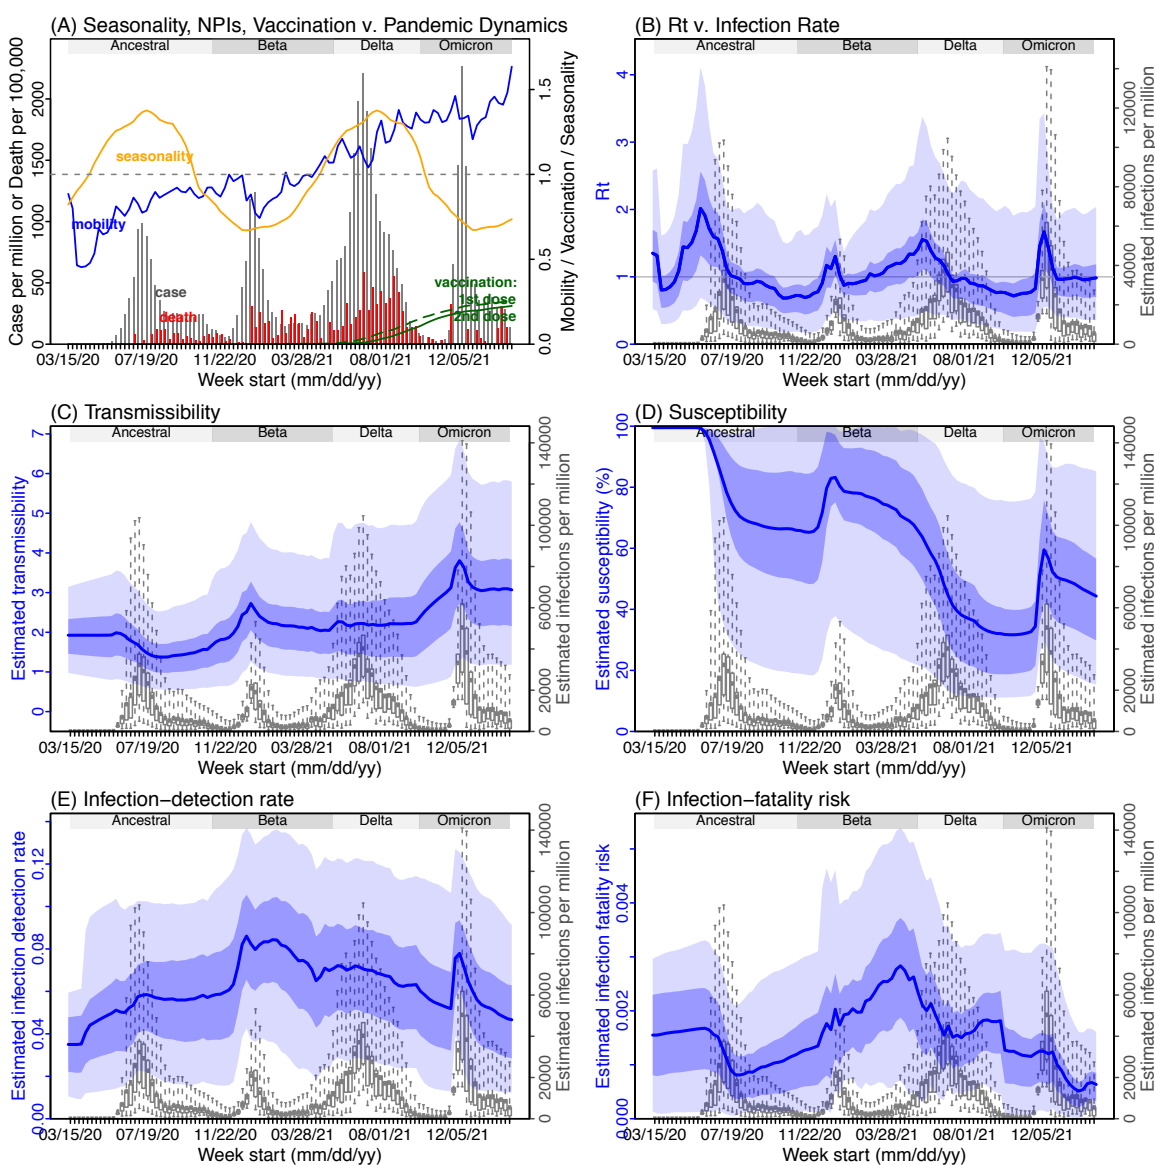



**Fig S10. Model inference estimates for *Free State*.** (A) Observed relative mobility, vaccination rate, and estimated disease seasonal trend, compared to case and death rates over time. Key model-inference estimates are shown for the time-varying effective reproduction number  $R_t$  (B), transmissibility  $R_{TX}$  (C), population susceptibility (D, shown relative to the population size in percentage), infection-detection rate (E), and infection-fatality risk (F). Grey shaded areas indicate the approximate circulation period for each variant. In (B) – (F), blue lines and surrounding areas show the estimated mean, 50% (dark) and 95% (light) CRIs; boxes and whiskers show the estimated mean, 50% and 95% CRIs for estimated infection rates. *Note that the transmissibility estimates ( $R_{TX}$  in C) have removed the effects of changing population susceptibility, NPIs, and disease seasonality; thus, the trends are more stable than the reproduction number ( $R_t$  in B) and reflect changes in variant-specific properties. Also note that infection-fatality risk estimates were based on reported COVID-19 deaths and may not reflect true values due to likely under-reporting of COVID-19 deaths.*

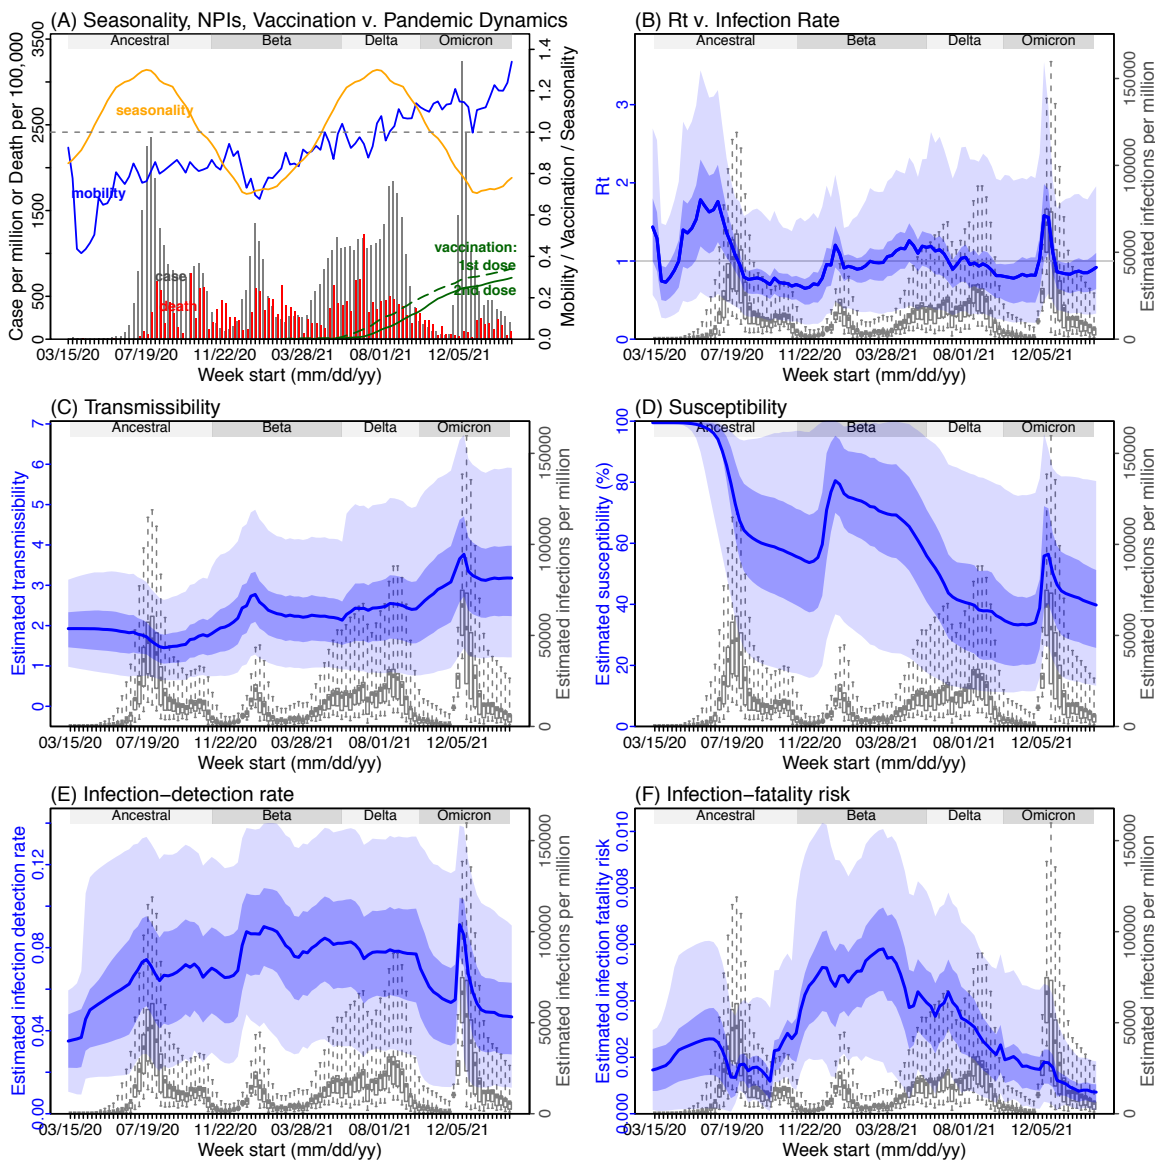

**Fig S11. Model inference estimates for Northern Cape.** (A) Observed relative mobility, vaccination rate, and estimated disease seasonal trend, compared to case and death rates over time. Key model-inference estimates are shown for the time-varying effective reproduction number  $R_t$  (B), transmissibility  $R_{TX}$  (C), population susceptibility (D, shown relative to the population size in percentage), infection-detection rate (E), and infection-fatality risk (F). Grey shaded areas indicate the approximate circulation period for each variant. In (B) – (F), blue lines and surrounding areas show the estimated mean, 50% (dark) and 95% (light) CrIs; boxes and whiskers show the estimated mean, 50% and 95% CrIs for estimated infection rates. *Note that the transmissibility estimates ( $R_{TX}$  in C) have removed the effects of changing population susceptibility, NPIs, and disease seasonality; thus, the trends are more stable than the reproduction number ( $R_t$  in B) and reflect changes in variant-specific properties. Also note that infection-fatality risk estimates were based on reported COVID-19 deaths and may not reflect true values due to likely under-reporting of COVID-19 deaths.*

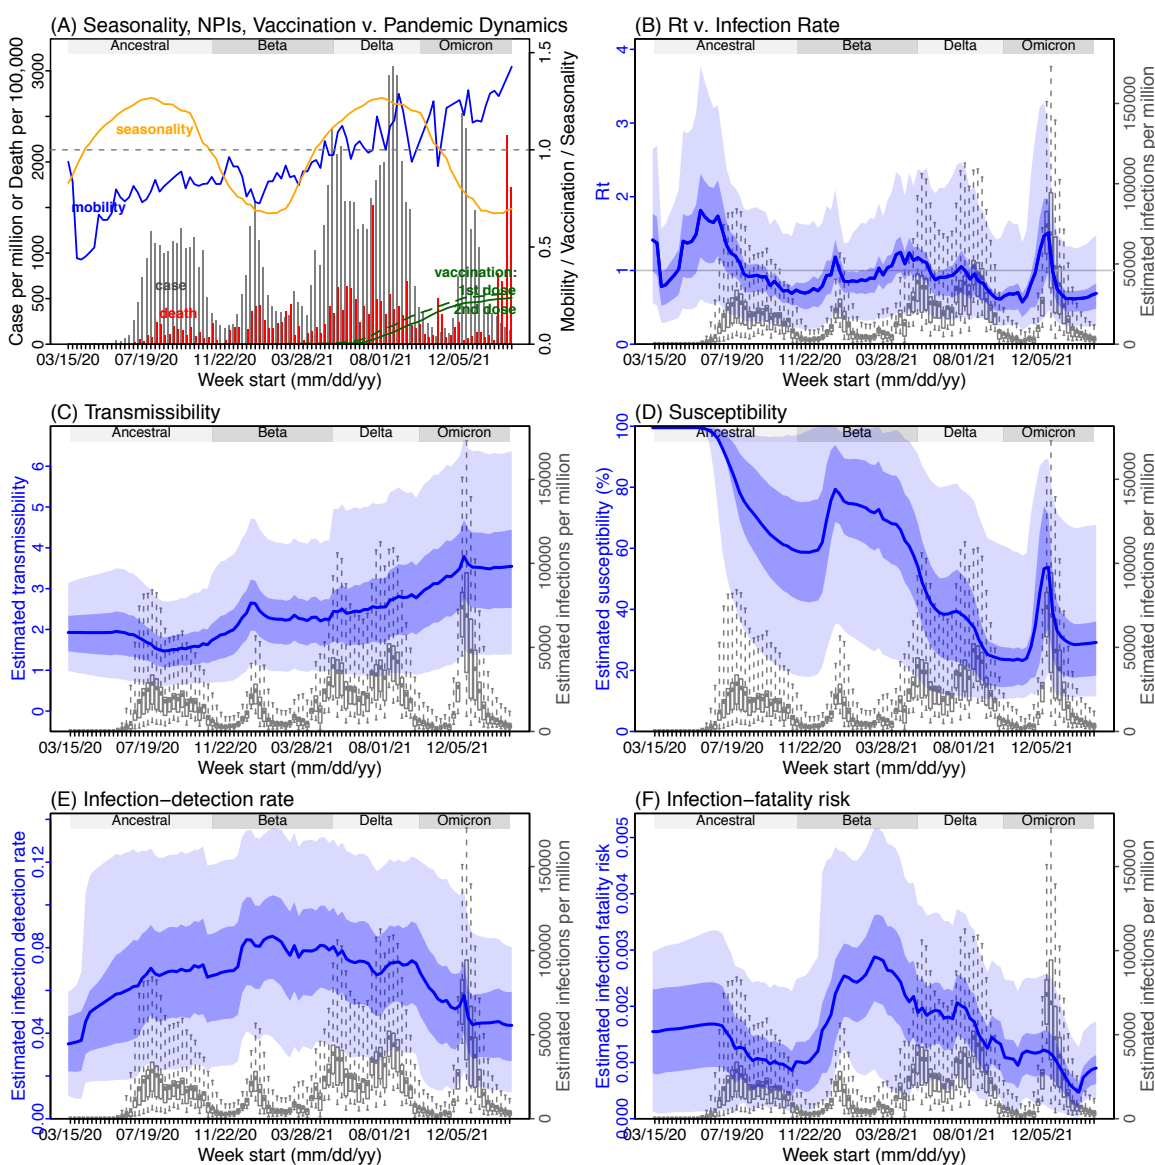

**Fig S12.** Comparison of posterior estimates for Gauteng during the Omicron (BA.1) wave, under four different settings for infection-detection rate. Four space reprobng (SR) settings for the infection-detection rate were tested and results are shown in the 4 four columns: 1) Use of the same baseline range as before (i.e., 1-8%) for all weeks during the Omicron (BA.1) wave; 2) Use of a wider and higher range (i.e., 1-12%) for all weeks; 3) Use of a range of 1-15% for the 1<sup>st</sup> week of Omicron detection, 5-20% for the 2<sup>nd</sup> week of Omicron detection, and 1-8% for the rest; and 4) Use of a range of 5-25% for the 2<sup>nd</sup> week of detection and 1-8% for all other weeks. Estimated infection-detection rates are shown in the 1<sup>st</sup> row, population susceptibility estimates are shown in the 2<sup>nd</sup> row, and transmissibility estimates are shown in the 3<sup>rd</sup> row. In each plot, blue lines and surrounding areas show the median, 50% and 95% CrIs of the posterior (left y-axis) for each week (x-axis). For comparison, reported cases for corresponding weeks are shown by the grey bars (right y-axis).

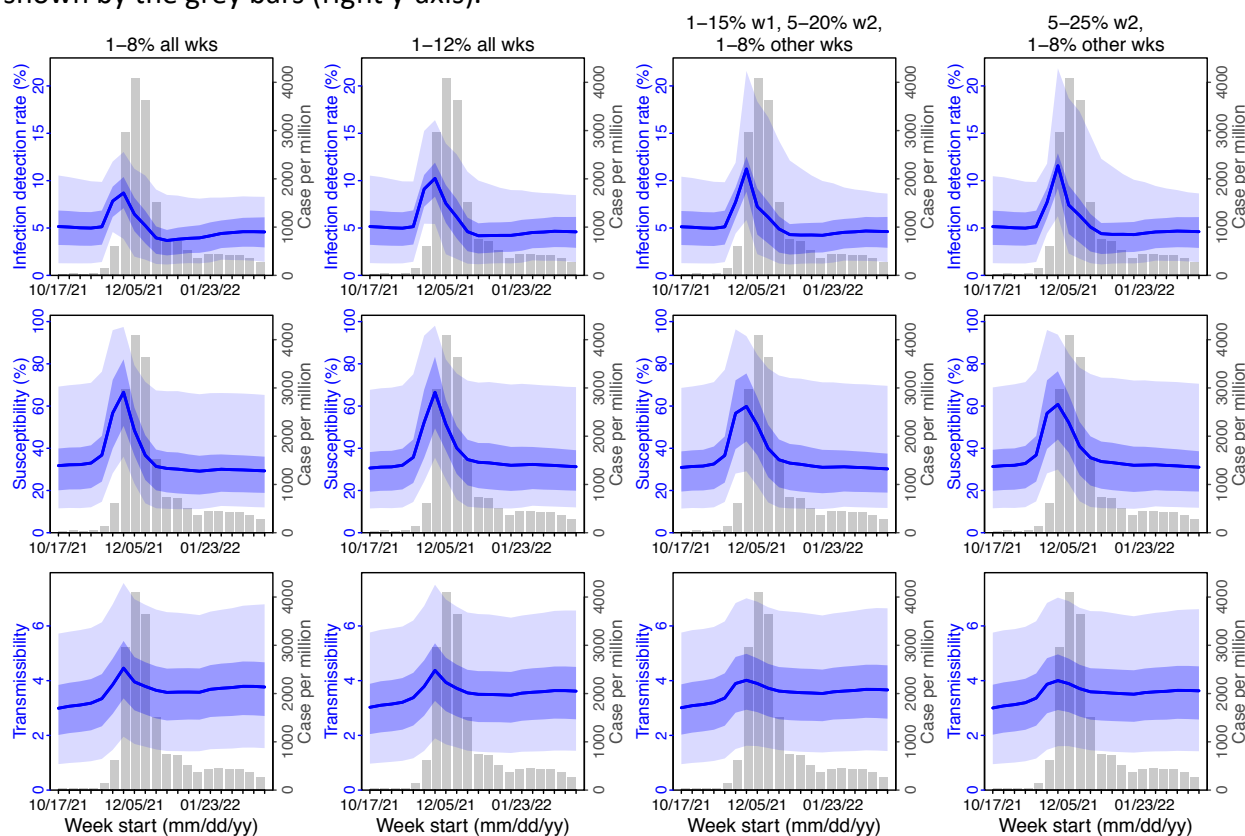

**Fig S13.** Comparison of retrospective prediction of the Omicron (BA.1) wave in Gauteng with the four different settings of infection-detection rate. Four space reprobating (SR) settings for the infection-detection rate were tested, and the results are shown in the 4 panels: 1) Use of the same baseline range as before (i.e., 1-8%) for all weeks during the Omicron (BA.1) wave; 2) Use of a wider and higher range (i.e., 1-12%) for all weeks; 3) Use of a range of 1-15% for the 1<sup>st</sup> week of Omicron detection, 5-20% for the 2<sup>nd</sup> week of Omicron detection, and 1-8% for the rest; and 4) Use of a range of 5-25% for the 2<sup>nd</sup> week of detection and 1-8% for all other weeks. Blue lines and show model fitted cases for weeks before the prediction. Red lines show model projected median weekly cases and deaths; surrounding shades show 50% (dark red) and 80% (light red) CIs of the prediction. For comparison, reported cases for each week are shown by the black dots; however, those to the right of the vertical dash lines (showing the start of each prediction) were not used in the model.

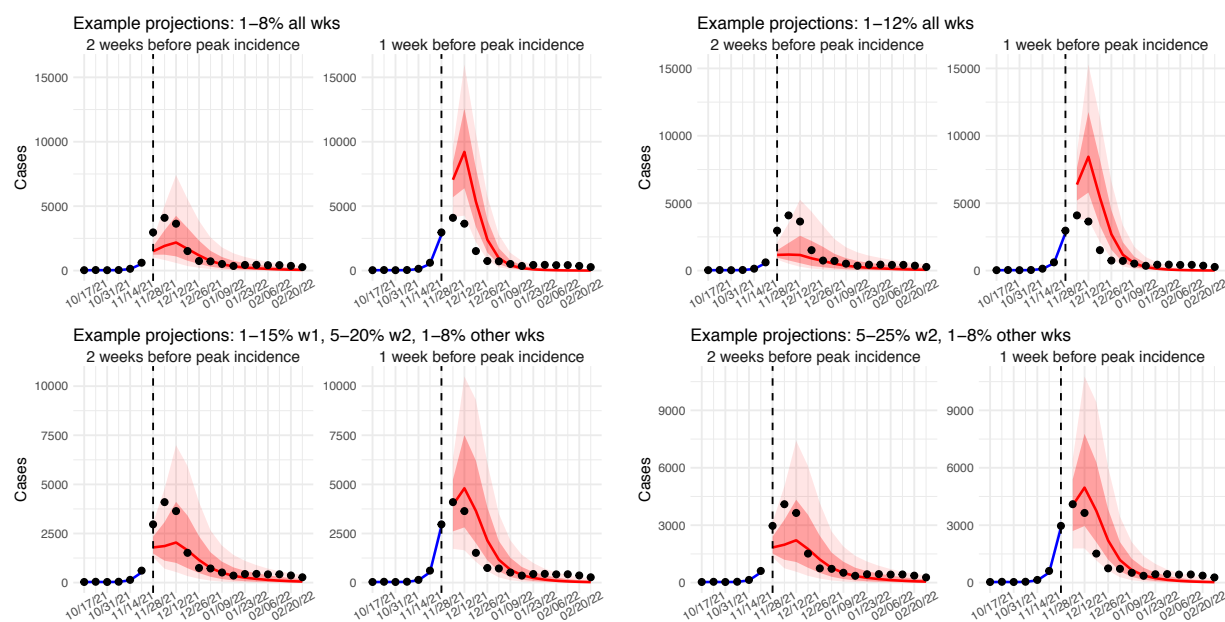

**Fig S14.** Comparison of the estimated increase in transmissibility and immune erosion for the Omicron (BA.1) variant in Gauteng, under four different settings of the infection-detection rate. Four space reprobating (SR) settings for the infection-detection rate were tested: 1) Use of the same baseline range as before (i.e., 1-8%) for all weeks during the Omicron (BA.1) wave; 2) Use of a wider and higher range (i.e., 1-12%) for all weeks; 3) Use of a range of 1-15% for the 1<sup>st</sup> week of Omicron detection, 5-20% for the 2<sup>nd</sup> week of Omicron detection, and 1-8% for the rest; and 4) Use of a range of 5-25% for the 2<sup>nd</sup> week of detection and 1-8% for all other weeks. Boxplots in left panel show the estimated distribution of increases in transmissibility, relative to the Ancestral SARS-CoV-2 (middle bar = median; edges = 50% CIs; and whiskers =95% CIs); boxplots in the right panel show the estimated distribution of immune erosion to all adaptive immunity gained from infection and vaccination prior to the surge of Omicron (BA.1) wave.

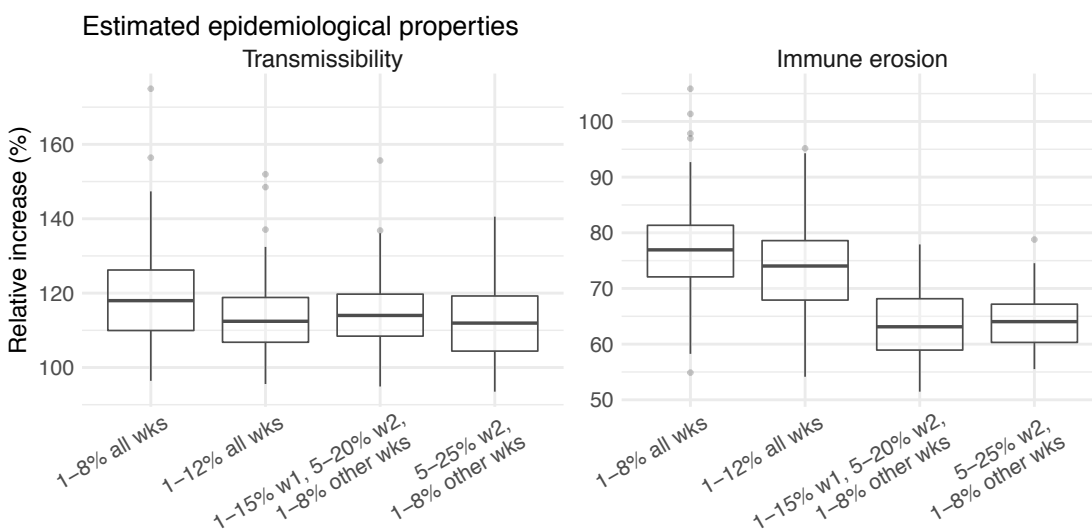

**Fig S15.** Posterior estimates for the transmission rate ( $\beta_t$  in Eqn 1) by week. Thick black lines show the median, dark blue areas show the 50% CrIs, and light blue areas show the 95% CrIs. For reference, the dashed vertical black lines indicate three dates (mm/dd/yy), i.e., 10/15/20, 5/15/21, and 11/15/21, roughly the start of the Beta, Delta, and Omicron waves, respectively.

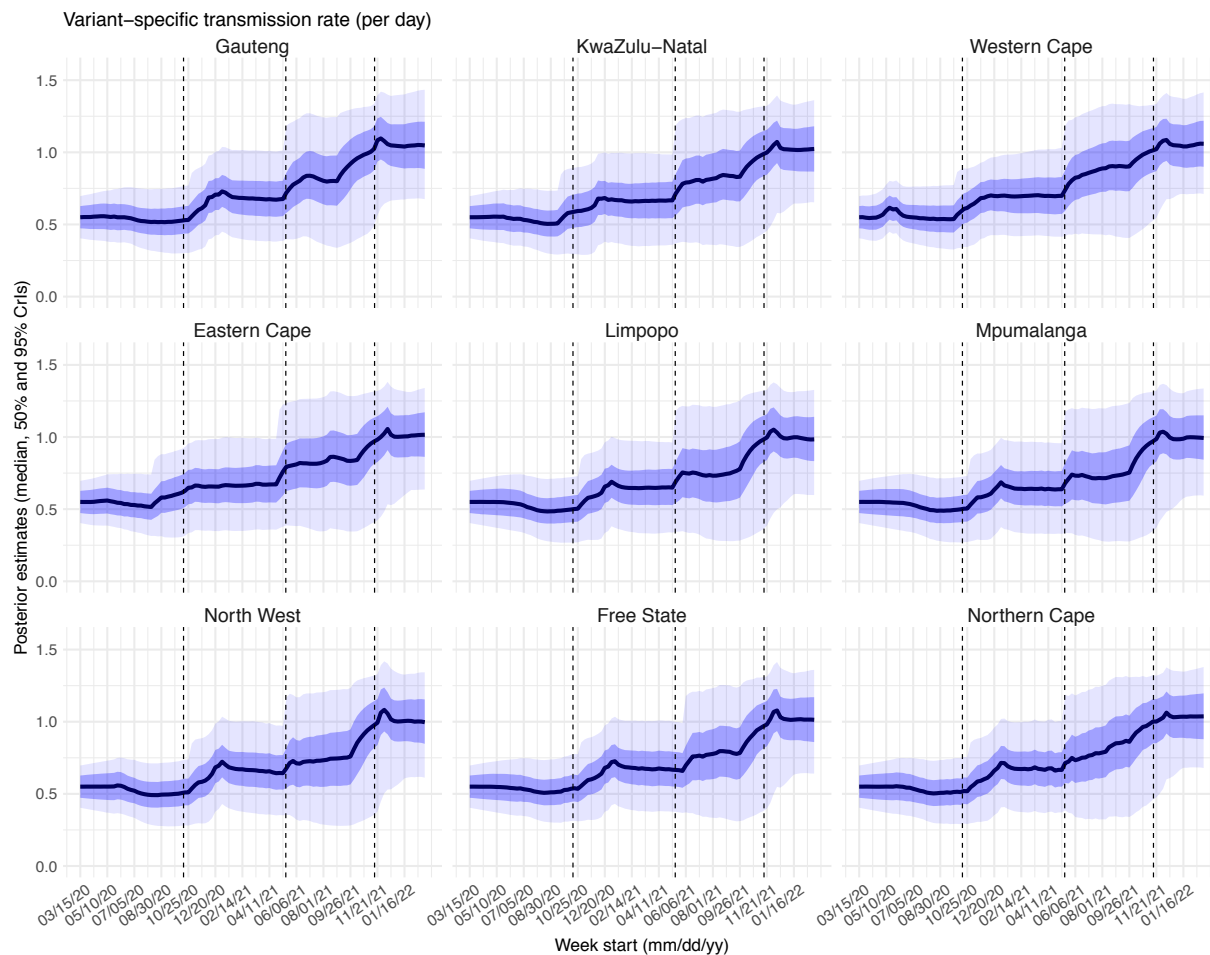

**Fig S16.** Posterior estimates for the latent period ( $Z_t$  in Eqn 1) by week. Thick black lines show the median, dark blue areas show the 50% CrIs, and light blue areas show the 95% CrIs. For reference, the dashed vertical black lines indicate three dates (mm/dd/yy), i.e., 10/15/20, 5/15/21, and 11/15/21, roughly the start of the Beta, Delta, and Omicron waves, respectively.

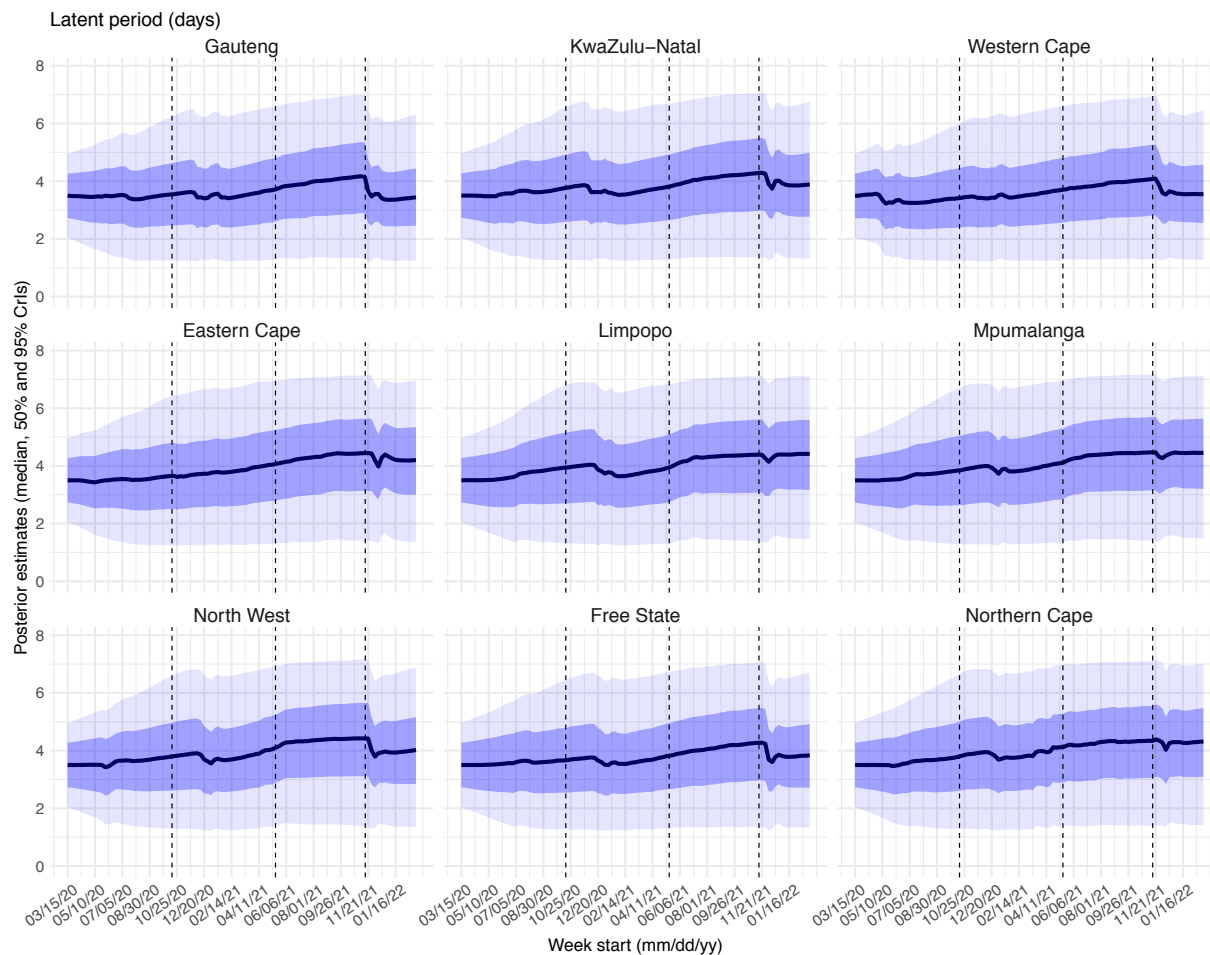

**Fig S17.** Posterior estimates for the infectious period ( $D_t$  in Eqn 1) by week. Thick black lines show the median, dark blue areas show the 50% CrIs, and light blue areas show the 95% CrIs. For reference, the dashed vertical black lines indicate three dates (mm/dd/yy), i.e., 10/15/20, 5/15/21, and 11/15/21, roughly the start of the Beta, Delta, and Omicron waves, respectively.

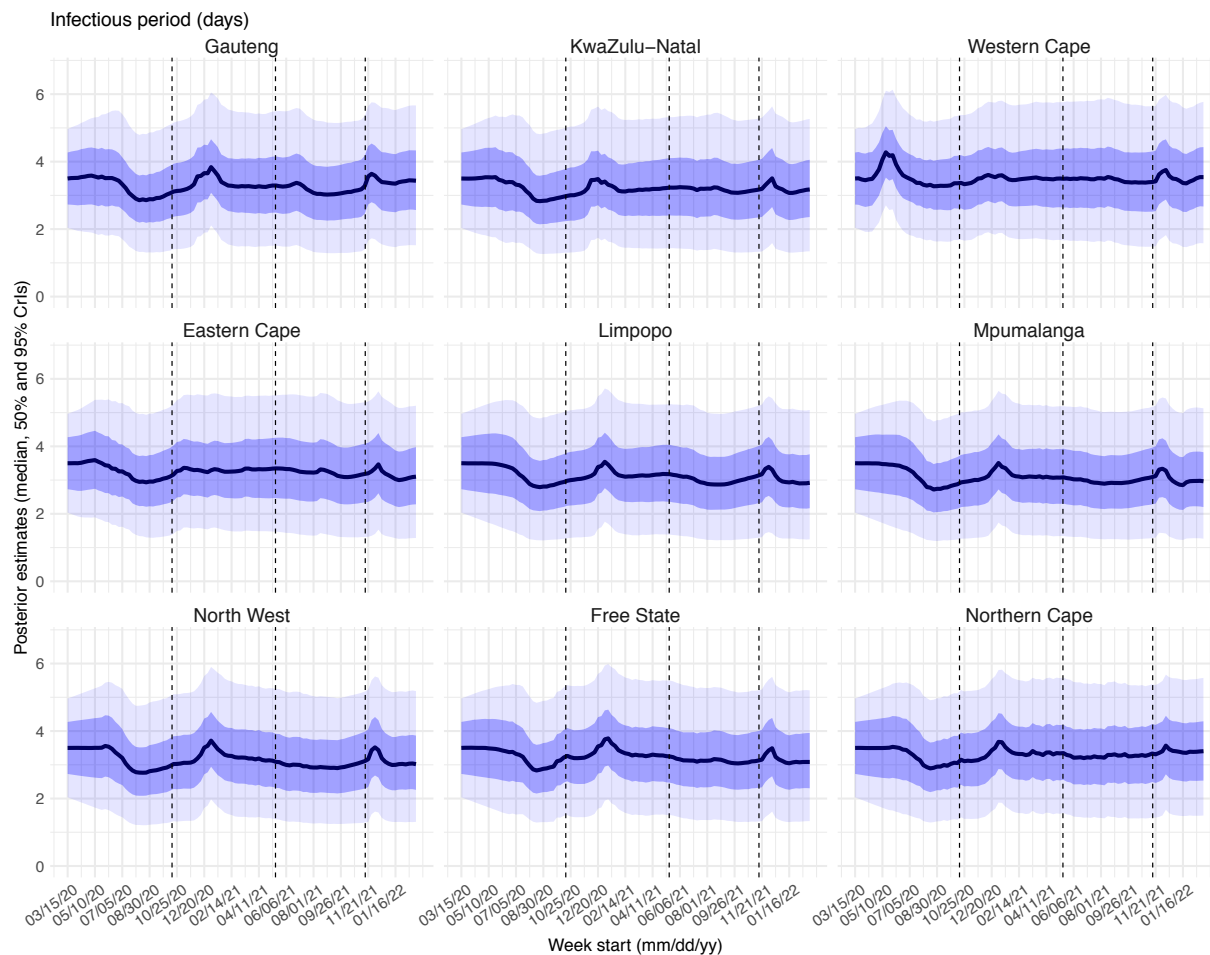



**Fig S18.** Posterior estimates for the immunity period ( $L_t$  in Eqn 1) by week. Thick black lines show the median, dark blue areas show the 50% CrIs, and light blue areas show the 95% CrIs. For reference, the dashed vertical black lines indicate three dates (mm/dd/yy), i.e., 10/15/20, 5/15/21, and 11/15/21, roughly the start of the Beta, Delta, and Omicron waves, respectively.

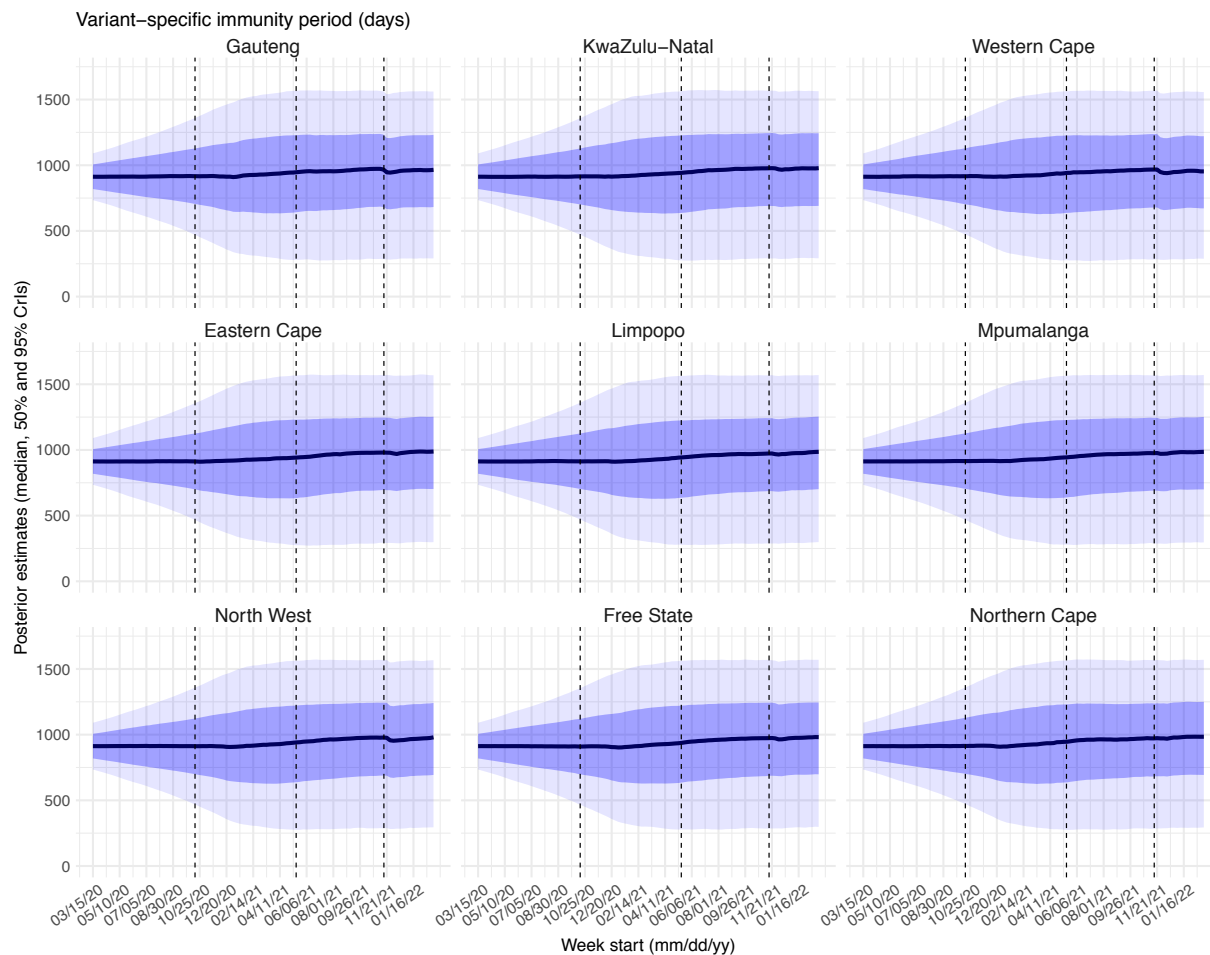

**Fig S19.** Posterior estimates for the scaling factor of NPI effectiveness ( $e_t$  in Eqn 1) by week. Thick black lines show the median, dark blue areas show the 50% CrIs, and light blue areas show the 95% CrIs. For reference, the dashed vertical black lines indicate three dates (mm/dd/yy), i.e., 10/15/20, 5/15/21, and 11/15/21, roughly the start of the Beta, Delta, and Omicron waves, respectively.

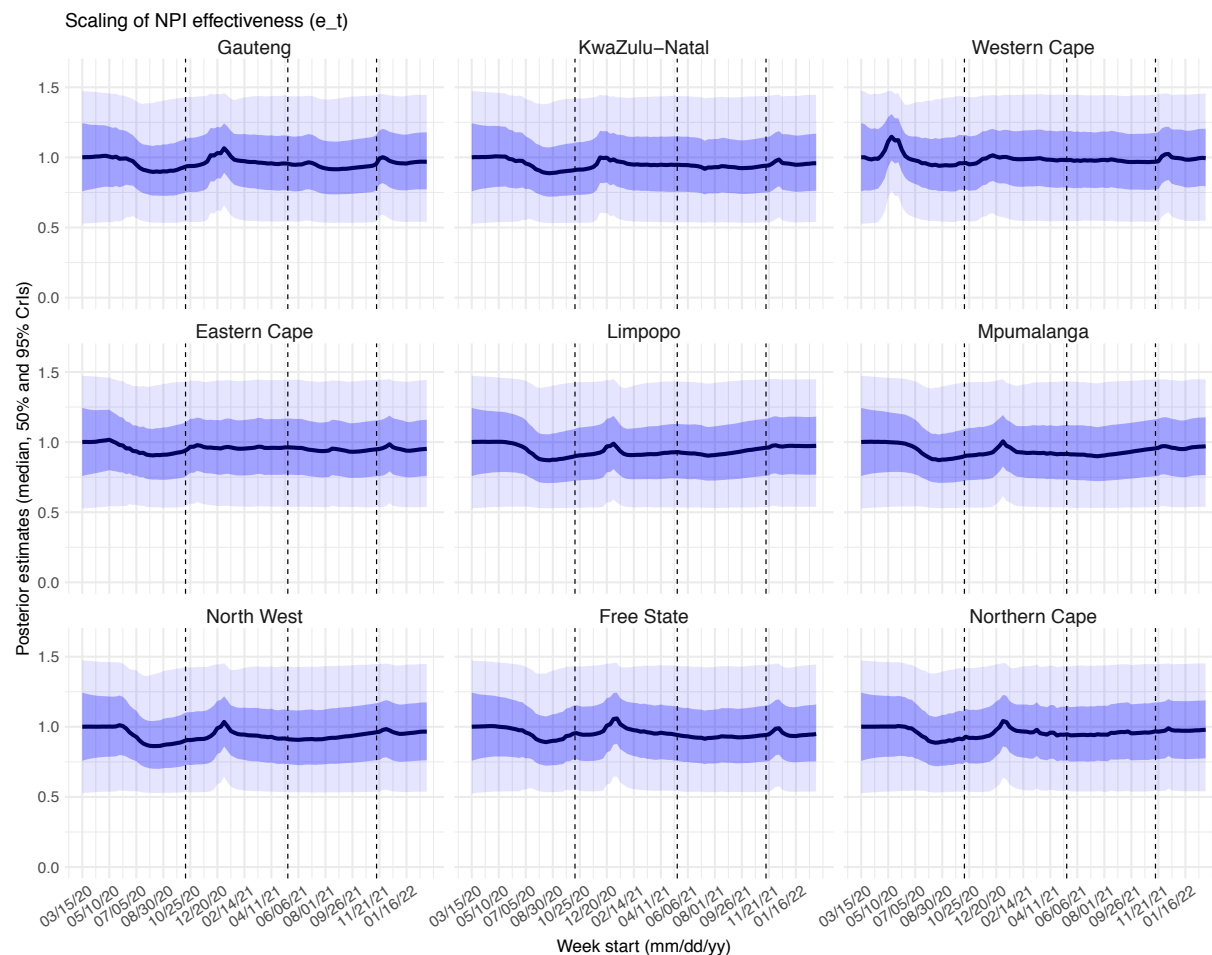

**Fig S20.** Posterior estimates for the mean of time from infectiousness to detection ( $T_{d,mean}$  in the observation model) by week. Thick black lines show the median, dark blue areas show the 50% CrIs, and light blue areas show the 95% CrIs. For reference, the dashed vertical black lines indicate three dates (mm/dd/yy), i.e., 10/15/20, 5/15/21, and 11/15/21, roughly the start of the Beta, Delta, and Omicron waves, respectively.

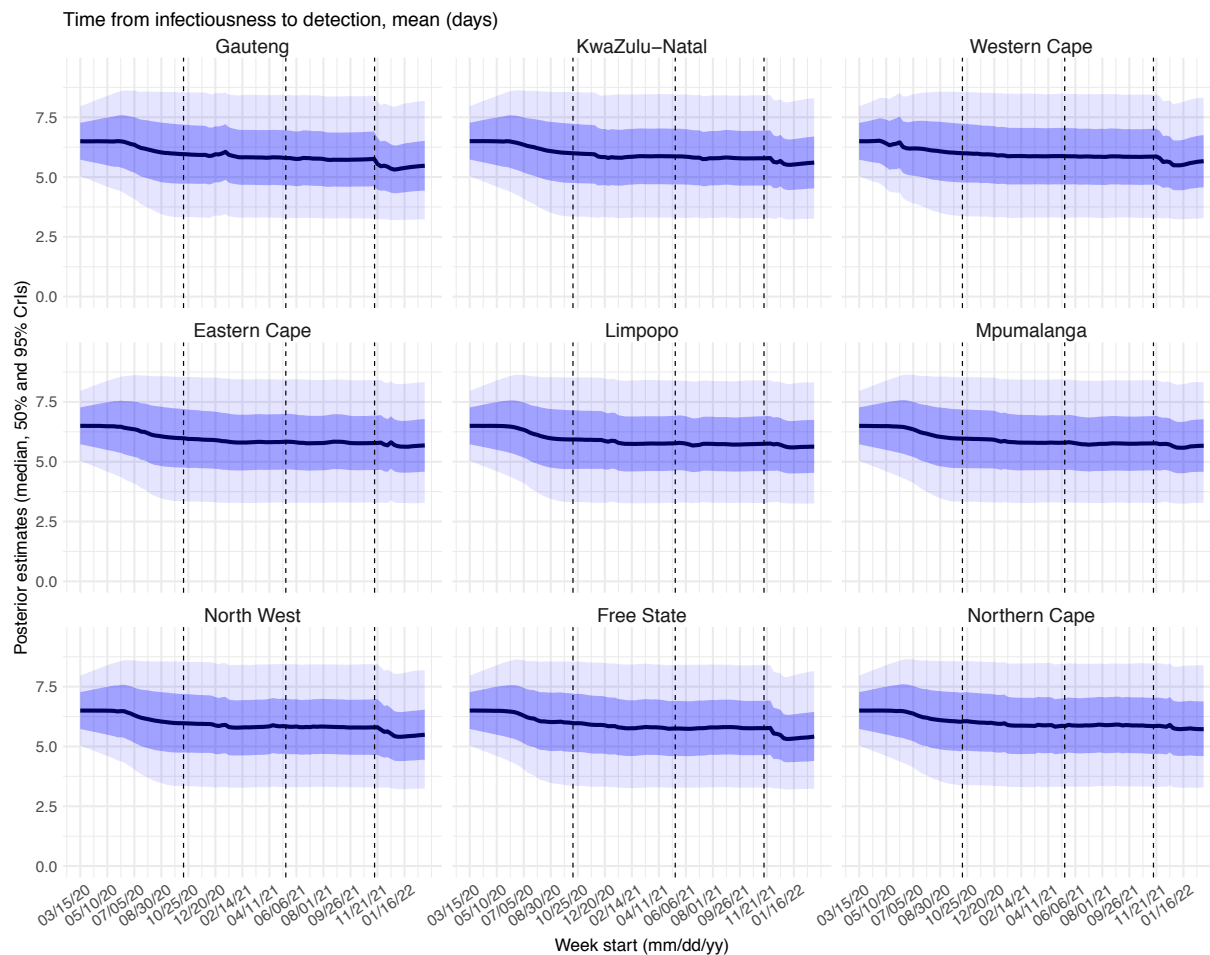

**Fig S21.** Posterior estimates for the standard deviation of time from infectiousness to detection ( $T_{d,sd}$  in the observation model) by week. Thick black lines show the median, dark blue areas show the 50% CrIs, and light blue areas show the 95% CrIs. For reference, the dashed vertical black lines indicate three dates (mm/dd/yy), i.e., 10/15/20, 5/15/21, and 11/15/21, roughly the start of the Beta, Delta, and Omicron waves, respectively.

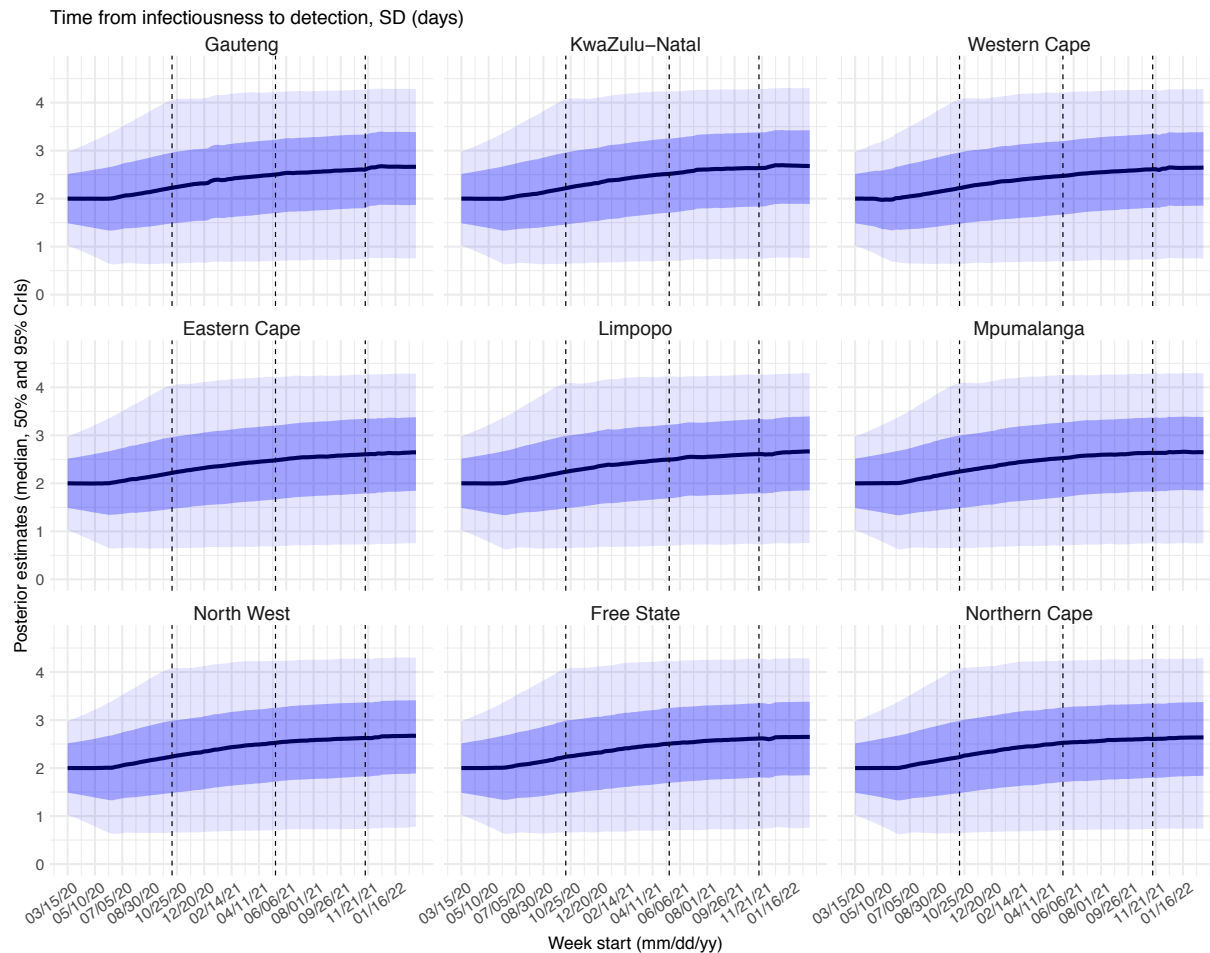

**Fig S22.** Posterior estimates for infection-detection rate ( $r_t$  in the observation model) by week. Thick black lines show the median, dark blue areas show the 50% CrIs, and light blue areas show the 95% CrIs. For reference, the dashed vertical black lines indicate three dates (mm/dd/yy), i.e., 10/15/20, 5/15/21, and 11/15/21, roughly the start of the Beta, Delta, and Omicron waves, respectively.

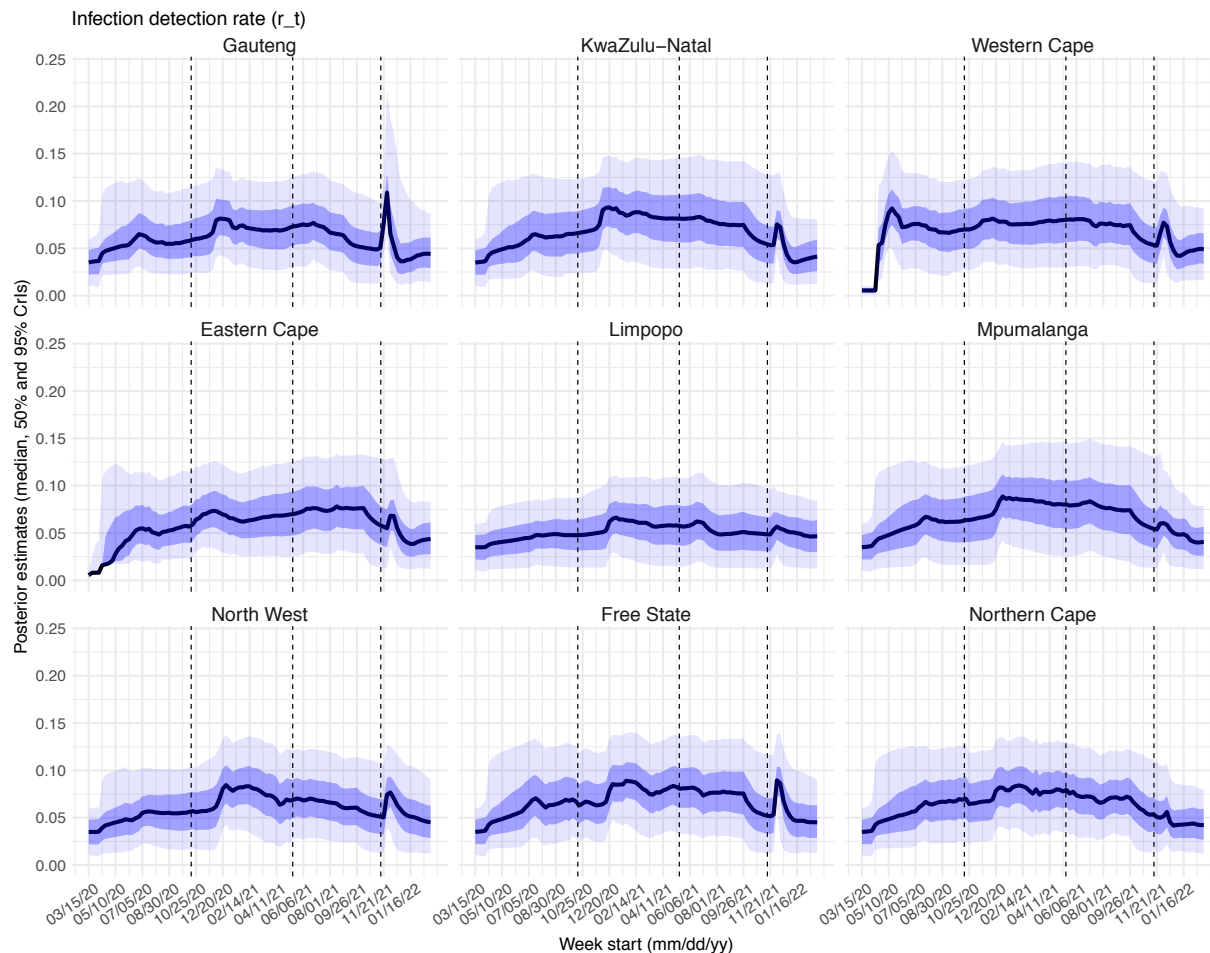

**Fig S23.** Posterior estimates for infection-fatality risk ( $IFR_t$  in the observation model) by week. Thick black lines show the median, dark blue areas show the 50% CrIs, and light blue areas show the 95% CrIs. For reference, the dashed vertical black lines indicate three dates (mm/dd/yy), i.e., 10/15/20, 5/15/21, and 11/15/21, roughly the start of the Beta, Delta, and Omicron waves, respectively.

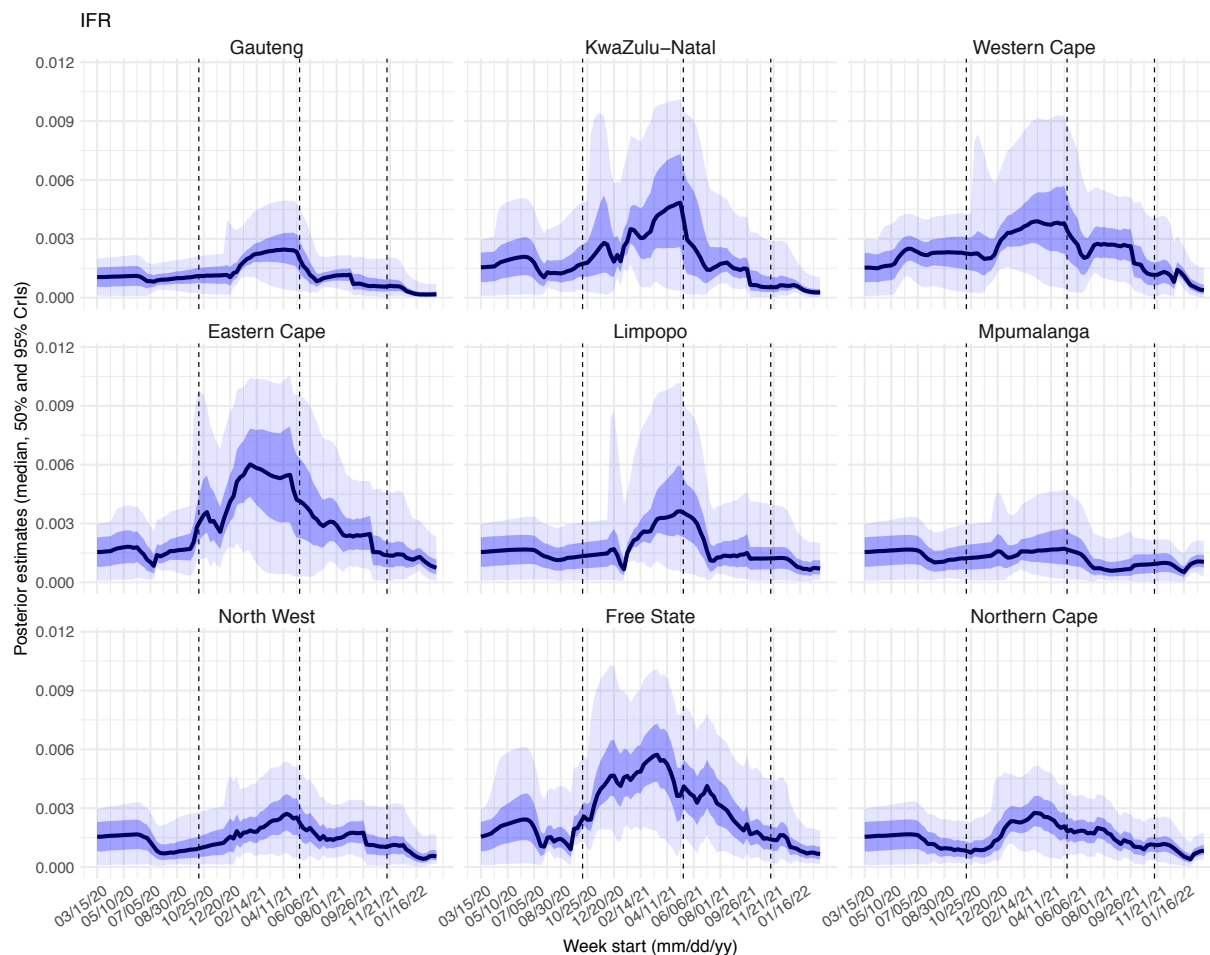

**Table S1. Model estimated infection-detection rate during each wave.** Numbers show the estimated percentage of infections (including asymptomatic and subclinical infections) documented as cases (mean and 95% CI in parentheses).

| Province      | Ancestral wave     | Beta wave          | Delta wave         | Omicron wave      |
|---------------|--------------------|--------------------|--------------------|-------------------|
| Gauteng       | 4.59 (2.62, 9.77)  | 6.18 (3.29, 11.11) | 6.27 (3.44, 12.39) | 4.16 (2.46, 9.72) |
| KwaZulu-Natal | 4.33 (2.01, 11.02) | 7.4 (3.89, 13.67)  | 5.69 (2.69, 12.34) | 3.25 (1.84, 7.81) |
| Western Cape  | 5.62 (3, 10.93)    | 7.1 (3.99, 12.78)  | 6.83 (3.71, 13.08) | 4.26 (2.49, 9.37) |
| Eastern Cape  | 3.79 (1.98, 9.39)  | 6.1 (3.35, 11.27)  | 5.58 (2.63, 11.52) | 2.91 (1.4, 7.99)  |
| Limpopo       | 2.13 (0.79, 6.46)  | 4.57 (1.89, 10.01) | 3.4 (1.53, 9.3)    | 2.9 (1.2, 7.55)   |
| Mpumalanga    | 3.42 (1.42, 9.1)   | 6.28 (2.85, 12.51) | 5.71 (2.58, 12.96) | 3.13 (1.54, 7.24) |
| North West    | 3.37 (1.62, 7.88)  | 5.79 (2.77, 11.14) | 5.26 (2.8, 10.8)   | 3.73 (1.78, 8.62) |
| Free State    | 5.02 (2.83, 10.63) | 6.69 (3.69, 11.97) | 6.5 (3.16, 13.23)  | 4.03 (2.12, 8.95) |
| Northern Cape | 4.96 (2.75, 10.34) | 6.49 (3.72, 11.44) | 6.69 (3.74, 12.32) | 3.71 (1.97, 8.21) |

**Table S2. Model estimated attack rate during each wave.** Numbers show estimated cumulative infection numbers, expressed as percentage of population size (mean and 95% CI in parentheses).

| Province      | Ancestral wave       | Beta wave            | Delta wave           | Omicron wave         |
|---------------|----------------------|----------------------|----------------------|----------------------|
| Gauteng       | 32.83 (15.42, 57.59) | 21.87 (12.16, 41.13) | 49.82 (25.22, 90.79) | 44.49 (19.01, 75.3)  |
| KwaZulu-Natal | 24.06 (9.45, 51.91)  | 26.36 (14.28, 50.18) | 27.15 (12.52, 57.39) | 38.11 (15.87, 67.56) |
| Western Cape  | 28.44 (14.61, 53.17) | 37.09 (20.61, 66.04) | 47.29 (24.68, 87.1)  | 44.1 (20.02, 75.4)   |
| Eastern Cape  | 32.85 (13.27, 62.95) | 27.44 (14.86, 49.95) | 25.59 (12.4, 54.34)  | 26.38 (9.59, 54.69)  |
| Limpopo       | 13.78 (4.55, 37.21)  | 17.12 (7.82, 41.41)  | 28.22 (10.33, 62.74) | 18.62 (7.15, 45.01)  |
| Mpumalanga    | 18.99 (7.14, 45.83)  | 17.33 (8.7, 38.21)   | 27.18 (11.97, 60.14) | 27.67 (11.96, 56.13) |
| North West    | 24.57 (10.51, 51.09) | 16.04 (8.34, 33.49)  | 37.21 (18.13, 70.02) | 26.17 (11.33, 54.71) |
| Free State    | 39.31 (18.54, 69.57) | 24.23 (13.54, 43.92) | 30.85 (15.16, 63.38) | 32.79 (14.76, 62.32) |
| Northern Cape | 34.92 (16.77, 63.13) | 26.98 (15.3, 47.09)  | 55.59 (30.18, 99.32) | 36.87 (16.65, 69.34) |



**Table S3. Model estimated infection-fatality risk during each wave.** Numbers are percentages (%; mean and 95% CI in parentheses). Note that these estimates were based on reported COVID-19 deaths and may be biased due to likely under-reporting of COVID-19 deaths. In addition, due to data irregularities, we computed the IFR using two methods. Estimates per Method 1 are the ratio of the total reported COVID-19 related deaths to the model-estimated cumulative infection rate during each wave. Estimates per Method 2 are the weighted average of the weekly IFR estimates during each wave. See details in Section 1 of the Supplemental text.

| Province                                                                      | Ancestral wave    | Beta wave         | Delta wave        | Omicron wave      |
|-------------------------------------------------------------------------------|-------------------|-------------------|-------------------|-------------------|
| Estimates per Method 1 (i.e., use reported COVID-19 deaths as the numerator): |                   |                   |                   |                   |
| Gauteng                                                                       | 0.09 (0.05, 0.2)  | 0.19 (0.1, 0.33)  | 0.11 (0.06, 0.21) | 0.03 (0.02, 0.06) |
| KwaZulu-Natal                                                                 | 0.09 (0.04, 0.24) | 0.27 (0.14, 0.49) | 0.14 (0.06, 0.29) | 0.03 (0.02, 0.08) |
| Western Cape                                                                  | 0.21 (0.11, 0.41) | 0.3 (0.17, 0.54)  | 0.25 (0.14, 0.48) | 0.06 (0.04, 0.14) |
| Eastern Cape                                                                  | 0.11 (0.06, 0.27) | 0.5 (0.27, 0.91)  | 0.2 (0.1, 0.42)   | 0.08 (0.04, 0.22) |
| Limpopo                                                                       | 0.06 (0.02, 0.17) | 0.18 (0.08, 0.4)  | 0.1 (0.04, 0.27)  | 0.05 (0.02, 0.12) |
| Mpumalanga                                                                    | 0.07 (0.03, 0.18) | 0.1 (0.05, 0.2)   | 0.04 (0.02, 0.1)  | 0.21 (0.11, 0.5)  |
| North West                                                                    | 0.05 (0.02, 0.11) | 0.21 (0.1, 0.4)   | 0.16 (0.08, 0.32) | 0.05 (0.03, 0.12) |
| Free State                                                                    | 0.13 (0.08, 0.28) | 0.42 (0.23, 0.75) | 0.26 (0.13, 0.52) | 0.09 (0.05, 0.2)  |
| Northern Cape                                                                 | 0.06 (0.03, 0.13) | 0.21 (0.12, 0.37) | 0.17 (0.1, 0.32)  | 0.22 (0.12, 0.48) |
| Estimates per Method 2 (i.e., weighted average of weekly IFR estimates):      |                   |                   |                   |                   |
| Gauteng                                                                       | 0.09 (0.02, 0.18) | 0.18 (0.05, 0.38) | 0.12 (0.04, 0.25) | 0.06 (0.01, 0.16) |
| KwaZulu-Natal                                                                 | 0.16 (0.02, 0.4)  | 0.28 (0.07, 0.69) | 0.21 (0.06, 0.55) | 0.08 (0.01, 0.23) |
| Western Cape                                                                  | 0.23 (0.06, 0.4)  | 0.3 (0.11, 0.68)  | 0.28 (0.09, 0.56) | 0.13 (0.02, 0.32) |
| Eastern Cape                                                                  | 0.15 (0.03, 0.33) | 0.39 (0.13, 0.8)  | 0.3 (0.07, 0.65)  | 0.15 (0.02, 0.39) |
| Limpopo                                                                       | 0.15 (0.01, 0.31) | 0.19 (0.02, 0.6)  | 0.2 (0.03, 0.54)  | 0.11 (0.01, 0.31) |
| Mpumalanga                                                                    | 0.14 (0.01, 0.29) | 0.16 (0.02, 0.39) | 0.1 (0.01, 0.29)  | 0.1 (0.01, 0.2)   |
| North West                                                                    | 0.12 (0.01, 0.27) | 0.21 (0.04, 0.45) | 0.17 (0.05, 0.37) | 0.1 (0.01, 0.26)  |
| Free State                                                                    | 0.18 (0.05, 0.45) | 0.46 (0.15, 0.87) | 0.32 (0.09, 0.65) | 0.14 (0.03, 0.34) |
| Northern Cape                                                                 | 0.12 (0.02, 0.27) | 0.22 (0.07, 0.44) | 0.18 (0.05, 0.34) | 0.1 (0.02, 0.22)  |

**Table S4.** Example estimation of reinfection rates. As an example, to compute reinfection rates, assume Beta is estimated  $\theta_{beta} = 65\%$  immune erosive, Delta is estimated  $\theta_{delta} = 40\%$  immune erosive, and Omicron BA.1 is estimated  $\theta_{omicron} = 65\%$  immune erosive, relative to the combined immunity accumulated until the rise of each of these variants (2<sup>nd</sup> column); and the attack rates (3<sup>rd</sup> column) are  $c_1 = z_1 = 30\%$ ,  $z_2 = 20\%$ ,  $z_3 = 50\%$ , and  $z_4 = 40\%$  during the ancestral, Beta, Delta, and Omicron BA.1 waves, respectively. Note these numbers roughly align with our estimates for Gauteng. The cumulative percentage of the population ever infected (including reinfections; 4<sup>th</sup> column), the percentage of reinfection during each VOC wave among the entire population (5<sup>th</sup> column) or among those infected by that variant (6<sup>th</sup> column) can be computed using the approach described in the supplemental text, sub-section “A proposed approach to compute reinfection rates using the model-inference estimates.”

| Variant        | Immune erosion, $\theta$ | Attack rate, $z$ | Cumulative % ever infected, $c$ | Percentage reinfection this wave, among entire population, $\eta'$ | those infected this wave, $\eta$ |
|----------------|--------------------------|------------------|---------------------------------|--------------------------------------------------------------------|----------------------------------|
| Ancestral      | -                        | 30.0%            | 30.0%                           | -                                                                  | -                                |
| Beta           | 65.0%                    | 20.0%            | 45.6%                           | 4.4%                                                               | 21.8%                            |
| Delta          | 40.0%                    | 50.0%            | 83.1%                           | 12.6%                                                              | 25.1%                            |
| Omicron (BA.1) | 65.0%                    | 40.0%            | 92.6%                           | 30.5%                                                              | 76.1%                            |

**Table S5.** Prior ranges for the parameters used in the model-inference system. All initial values are drawn from uniform distributions using Latin Hypercube Sampling.

| Parameter/<br>variable             | Symbol   | Prior range                                                                                                                                                                                                                                              | Source/rationale                                                                                                                                                                                                                                                                                                                                                                                                                                                                       |
|------------------------------------|----------|----------------------------------------------------------------------------------------------------------------------------------------------------------------------------------------------------------------------------------------------------------|----------------------------------------------------------------------------------------------------------------------------------------------------------------------------------------------------------------------------------------------------------------------------------------------------------------------------------------------------------------------------------------------------------------------------------------------------------------------------------------|
| Initial exposed                    | $E(t=0)$ | 1 – 500 times of reported cases during the Week of March 15, 2020 for Western Cape and Eastern Cape; 1 – 10 times of reported cases during the Week of March 15, 2020, for other provinces                                                               | Low infection-detection rate in first weeks; earlier and higher case numbers reported in Western Cape and Eastern Cape than other provinces.                                                                                                                                                                                                                                                                                                                                           |
| Initial infectious                 | $I(t=0)$ | Same as for $E(t=0)$                                                                                                                                                                                                                                     |                                                                                                                                                                                                                                                                                                                                                                                                                                                                                        |
| Initial susceptible                | $S(t=0)$ | 99 – 100% of the population                                                                                                                                                                                                                              | Almost everyone is susceptible initially                                                                                                                                                                                                                                                                                                                                                                                                                                               |
| Population size                    | $N$      | N/A                                                                                                                                                                                                                                                      | Based on population data from COVID19ZA (main text ref 24)                                                                                                                                                                                                                                                                                                                                                                                                                             |
| Variant-specific transmission rate | $\beta$  | For all provinces, starting from U[0.4, 0.7] at time 0 and allowed to increase over time using space re-probing(1) with values drawn from U[0.5, 0.9] during the Beta wave, U[0.7, 1.25] during the Delta wave, and U[0.7, 1.3] during the Omicron wave. | For the initial range at model initialization, based on $R_0$ estimates of around 1.5-4 for SARS-CoV-2.(2-4) For the Beta, Delta and Omicron variants, we use large bounds for space re-probing (SR)(1) to explore the parameter state space and enable estimation of changes in transmissibility due to the new variants. Note that SR is only applied to 3-10% of the ensemble members and $\beta$ can migrate outside either the initial range or the SR ranges during EAKF update. |
| Scaling of effectiveness of NPI    | $e$      | [0.5, 1.5], for all provinces                                                                                                                                                                                                                            | Around 1, with a large bound to be flexible.                                                                                                                                                                                                                                                                                                                                                                                                                                           |

|                                                                  |          |                                                                                                                                                                                                                                                                                               |                                                                                                                                                                                                    |
|------------------------------------------------------------------|----------|-----------------------------------------------------------------------------------------------------------------------------------------------------------------------------------------------------------------------------------------------------------------------------------------------|----------------------------------------------------------------------------------------------------------------------------------------------------------------------------------------------------|
| Latency period                                                   | $Z$      | [2, 5] days, for all provinces                                                                                                                                                                                                                                                                | Incubation period: 5.2 days (95% CI: 4.1, 7)(2); latency period is likely shorter than the incubation period                                                                                       |
| Infectious period                                                | $D$      | [2, 5] days, for all provinces                                                                                                                                                                                                                                                                | Time from symptom onset to hospitalization: 3.8 days (95% CI: 0, 12.0) in China,(5) plus 1-2 days viral shedding before symptom onset. We did not distinguish symptomatic/asymptomatic infections. |
| Immunity period                                                  | $L$      | [730, 1095] days, for all provinces                                                                                                                                                                                                                                                           | Assuming immunity lasts for 2-3 years                                                                                                                                                              |
| Mean of time from viral shedding to diagnosis                    | $T_m$    | [5, 8] days, for all provinces                                                                                                                                                                                                                                                                | From a few days to a week from symptom onset to diagnosis/reporting,(5) plus 1-2 days of viral shedding (being infectious) before symptom onset.                                                   |
| Standard deviation (SD) of time from viral shedding to diagnosis | $T_{sd}$ | [1, 3] days, for all provinces                                                                                                                                                                                                                                                                | To allow variation in time to diagnosis/reporting                                                                                                                                                  |
| Infection-detection rate                                         | $r$      | Starting from U[0.001, 0.01] at time 0 for Western Cape and Eastern Cape as these two provinces had earlier and higher case numbers during March – April 2020 than other provinces, suggesting lower detection rate at the time; for the rest starting from U[0.01, 0.06]. For all provinces, | Large uncertainties; therefore, in general we use large prior bounds and large bounds for space re-probing (SR). Note that SR is only applied to 3-10% of the ensemble members and $r$ can migrate |

---

|                                      |                                                                                                                                                                                                                                                                                                                                                                                                                                                                                                                                                                                                                                                                                                                                                                                                                                                                                                                                                                                                                                                                                                                                                                                                                                                                                                                                                                                                                                                                                 |                                                                                                                                                                                                                                                                                                                                                                                                                                                                                                                                                                                                                                                                                                                                          |
|--------------------------------------|---------------------------------------------------------------------------------------------------------------------------------------------------------------------------------------------------------------------------------------------------------------------------------------------------------------------------------------------------------------------------------------------------------------------------------------------------------------------------------------------------------------------------------------------------------------------------------------------------------------------------------------------------------------------------------------------------------------------------------------------------------------------------------------------------------------------------------------------------------------------------------------------------------------------------------------------------------------------------------------------------------------------------------------------------------------------------------------------------------------------------------------------------------------------------------------------------------------------------------------------------------------------------------------------------------------------------------------------------------------------------------------------------------------------------------------------------------------------------------|------------------------------------------------------------------------------------------------------------------------------------------------------------------------------------------------------------------------------------------------------------------------------------------------------------------------------------------------------------------------------------------------------------------------------------------------------------------------------------------------------------------------------------------------------------------------------------------------------------------------------------------------------------------------------------------------------------------------------------------|
|                                      | <p>allowed <math>r</math> to increase over time using space re-probing (1) with values drawn from uniform distributions with ranges between roughly 0.01 to 0.12.</p>                                                                                                                                                                                                                                                                                                                                                                                                                                                                                                                                                                                                                                                                                                                                                                                                                                                                                                                                                                                                                                                                                                                                                                                                                                                                                                           | <p>outside either the initial range or the SR ranges during EAKF update.</p>                                                                                                                                                                                                                                                                                                                                                                                                                                                                                                                                                                                                                                                             |
| <p>Infection fatality risk (IFR)</p> | <p><u>For Gauteng</u>: starting from [0.0001, 0.002] at time 0 and allowed to change over time using space re-probing(1) with values drawn from U[0.0001, 0.005] during 12/13/2020 – 5/15/21 (due to Beta), U[0.0001, 0.002] during the Delta wave, and U[0.00001, 0.00075] starting 9/1/21 (Omicron wave).</p> <p><u>For KwaZulu-Natal</u>: starting from U[0.0001, 0.003] at time 0 and allowed to change over time using space re-probing (1) with values drawn from U[0.0001, 0.005] during 4/19/20 – 10/31/20 (ancestral wave), U[0.0001, 0.01] during 11/1/20 – 5/15/21 (Beta wave), U[0.0001, 0.002] during the Delta wave, and U[0.00001, 0.00075] starting 10/1/21 (Omicron wave).</p> <p><u>For Western Cape</u>: starting from U[0.00001, 0.003] at time 0 and allowed to change over time using space re-probing (1) with values drawn from U[0.00001, 0.0004] during 4/19/20 – 10/31/20 (ancestral wave), U[0.00001, 0.01] during 11/1/20 – 5/15/21 (Beta wave), U[0.00001, 0.005] during 5/16/21 – 9/30/21 (Delta wave) and U[0.00001, 0.002] starting 10/1/21 (Omicron wave).</p> <p><u>For Eastern Cape</u>: starting from U[0.0001, 0.003] at time 0 and allowed to change over time using space re-probing(1) with values drawn from U[0.0001, 0.004] during 4/19/20 – 9/30/20 (Ancestral wave), U[0.0001, 0.01] during 10/1/20 – 40/30/21 (Beta wave), [0.0001, 0.005] during the Delta wave, and U[0.00001, 0.002] or starting 10/16/21 (Omicron wave).</p> | <p>Based on previous estimates(6) but extend to have wider ranges. Note that SR is only applied to 3-10% of the ensemble members and IFR can migrate outside either the initial range or the SR ranges during EAKF update.</p> <p>Western Cape had earlier and higher case numbers during March – April 2020 than other provinces, suggesting lower detection rate at the time.</p> <p>Initial mortality rate in Gauteng was relatively low because initial infections occurred mainly among middle-aged, returning holiday makers.(7)</p> <p>Earlier spread of Beta in Eastern Cape, KwaZulu-Natal, and Northern Cape, higher numbers of deaths per capita reported.</p> <p>Free State reported higher number of deaths per capita.</p> |

---

---

For Limpopo and Mpumalanga: starting from U[0.0001, 0.003] at time 0 and allowed to change over time using space re-probing (1) with values drawn from U[0.0001, 0.01] during the Beta wave, U[0.0001, 0.005] during the Delta wave, U[0.00001, .002] for the Omicron wave.

For Free State: starting from U[0.0001, 0.003] at time 0 and allowed to change over time using space re-probing (1) with values drawn from U[0.0001, 0.006] during 3/16/20 – 10/31/20, U[0.0001, 0.01] during the Beta wave, U[0.0001, 0.008] during the Delta wave, and U[0.00001, 0.002] starting 10/1/21 (Omicron wave).

For North West and Northern Cape: starting from U[0.0001, 0.003] at time 0 and allowed to change over time using space re-probing (1) with values drawn from U[0.0001, 0.005] during the Beta wave, U[0.0001, 0.003] during the Delta wave, and U[0.00001, 0.0015] starting 10/1/21 (Omicron wave).

---

References including in Table S5:

1. Yang W & Shaman J (2014) A simple modification for improving inference of non-linear dynamical systems. *arXiv:1403.6804*.
2. Li Q, *et al.* (2020) Early Transmission Dynamics in Wuhan, China, of Novel Coronavirus–Infected Pneumonia. *New Engl J Med*.
3. Wu JT, Leung K, & Leung GM (2020) Nowcasting and forecasting the potential domestic and international spread of the 2019-nCoV outbreak originating in Wuhan, China: a modelling study. *Lancet* 395(10225):689-697.
4. Li R, *et al.* (2020) Substantial undocumented infection facilitates the rapid dissemination of novel coronavirus (SARS-CoV-2). *Science* 368(6490):489-493.
5. Zhang J, *et al.* (2020) Evolving epidemiology and transmission dynamics of coronavirus disease 2019 outside Hubei province, China: a descriptive and modelling study. *The Lancet. Infectious diseases* 20(7):793-802.
6. Verity R, *et al.* (2020) Estimates of the severity of coronavirus disease 2019: a model-based analysis. *The Lancet. Infectious diseases* 20(6):669-677.
7. Giandhari J, *et al.* (2021) Early transmission of SARS-CoV-2 in South Africa: An epidemiological and phylogenetic report. *Int J Infect Dis* 103:234-241.

1 **Table S6.** Approximate epidemic timing (mm/dd/yy) for each wave in each province, used in the  
 2 study. Note 3/5/22 is the last date of the study period.

| Province      | Variant   | Start date | End date |
|---------------|-----------|------------|----------|
| Gauteng       | Ancestral | 3/15/20    | 10/31/20 |
| Gauteng       | Beta      | 11/1/20    | 5/15/21  |
| Gauteng       | Delta     | 5/16/21    | 8/31/21  |
| Gauteng       | Omicron   | 9/1/21     | 3/5/22   |
| KwaZulu-Natal | Ancestral | 3/15/20    | 9/15/20  |
| KwaZulu-Natal | Beta      | 9/16/20    | 5/15/21  |
| KwaZulu-Natal | Delta     | 5/16/21    | 9/30/21  |
| KwaZulu-Natal | Omicron   | 10/1/21    | 3/5/22   |
| Western Cape  | Ancestral | 3/15/20    | 9/15/20  |
| Western Cape  | Beta      | 9/16/20    | 5/15/21  |
| Western Cape  | Delta     | 5/16/21    | 9/30/21  |
| Western Cape  | Omicron   | 10/1/21    | 3/5/22   |
| Eastern Cape  | Ancestral | 3/15/20    | 8/15/20  |
| Eastern Cape  | Beta      | 8/16/20    | 4/30/21  |
| Eastern Cape  | Delta     | 5/1/21     | 10/15/21 |
| Eastern Cape  | Omicron   | 10/16/21   | 3/5/22   |
| Limpopo       | Ancestral | 3/15/20    | 10/31/20 |
| Limpopo       | Beta      | 11/1/20    | 5/15/21  |
| Limpopo       | Delta     | 5/16/21    | 9/30/21  |
| Limpopo       | Omicron   | 10/1/21    | 3/5/22   |
| Mpumalanga    | Ancestral | 3/15/20    | 10/31/20 |
| Mpumalanga    | Beta      | 11/1/20    | 5/15/21  |
| Mpumalanga    | Delta     | 5/16/21    | 9/30/21  |
| Mpumalanga    | Omicron   | 10/1/21    | 3/5/22   |
| North West    | Ancestral | 3/15/20    | 10/31/20 |
| North West    | Beta      | 11/1/20    | 5/15/21  |
| North West    | Delta     | 5/16/21    | 9/30/21  |
| North West    | Omicron   | 10/1/21    | 3/5/22   |
| Free State    | Ancestral | 3/15/20    | 10/31/20 |
| Free State    | Beta      | 11/1/20    | 5/31/21  |
| Free State    | Delta     | 6/1/21     | 9/30/21  |
| Free State    | Omicron   | 10/1/21    | 3/5/22   |
| Northern Cape | Ancestral | 3/15/20    | 10/31/20 |
| Northern Cape | Beta      | 11/1/20    | 5/15/21  |
| Northern Cape | Delta     | 5/16/21    | 9/30/21  |
| Northern Cape | Omicron   | 10/1/21    | 3/5/22   |

3
